# Supplementary material for: Single caudate neurons encode temporally discounted value for formulating motivation for action
Source: eLife. 2021 Jul 30;10:e61248. doi: 10.7554/eLife.61248 (PMC8352586; doi:10.7554/eLife.61248)
Supplement: Figure 1—source data 1. [file elife-61248-fig1-data1.xls]

## Sheet: C
Monkey	Session	delay	reward	error_rate_%
BI	104	0	1	1.8
BI	104	3.3	1	5.2
BI	104	6.9	1	6.7
BI	104	0	4	1.8
BI	104	3.3	4	4.3
BI	104	6.9	4	5.9
BI	105	0	1	0.8
BI	105	3.3	1	3.2
BI	105	6.9	1	10.4
BI	105	0	4	0
BI	105	3.3	4	0.8
BI	105	6.9	4	0.8
BI	106	0	1	0.8
BI	106	3.3	1	3.8
BI	106	6.9	1	0.8
BI	106	0	4	0
BI	106	3.3	4	0.8
BI	106	6.9	4	2.3
BI	107	0	1	0.8
BI	107	3.3	1	0.8
BI	107	6.9	1	1.6
BI	107	0	4	0.8
BI	107	3.3	4	0
BI	107	6.9	4	1.6
BI	118	0	1	0
BI	118	3.3	1	3.2
BI	118	6.9	1	5.5
BI	118	0	4	0.8
BI	118	3.3	4	0.8
BI	118	6.9	4	0.8
BI	119	0	1	0.8
BI	119	3.3	1	5.5
BI	119	6.9	1	4.8
BI	119	0	4	0.8
BI	119	3.3	4	0.8
BI	119	6.9	4	1.6
BI	120	0	1	0.8
BI	120	3.3	1	1.6
BI	120	6.9	1	6.2
BI	120	0	4	0.8
BI	120	3.3	4	1.6
BI	120	6.9	4	3.2
BI	124	0	1	1.6
BI	124	3.3	1	4
BI	124	6.9	1	3.9
BI	124	0	4	0
BI	124	3.3	4	0
BI	124	6.9	4	1.6
BI	139	0	1	1.6
BI	139	3.3	1	3.8
BI	139	6.9	1	8.1
BI	139	0	4	0.8
BI	139	3.3	4	2.3
BI	139	6.9	4	3.1
BI	148	0	1	1.7
BI	148	3.3	1	3.3
BI	148	6.9	1	13.2
BI	148	0	4	2.5
BI	148	3.3	4	0
BI	148	6.9	4	7
BI	155	0	1	0
BI	155	3.3	1	4.8
BI	155	6.9	1	8.5
BI	155	0	4	0
BI	155	3.3	4	1.6
BI	155	6.9	4	7
BI	156	0	1	1.6
BI	156	3.3	1	6.2
BI	156	6.9	1	8.3
BI	156	0	4	0.8
BI	156	3.3	4	4.7
BI	156	6.9	4	0.8
BI	168	0	1	0.8
BI	168	3.3	1	6.3
BI	168	6.9	1	8.4
BI	168	0	4	0.8
BI	168	3.3	4	0.8
BI	168	6.9	4	1.6
BI	174	0	1	1.6
BI	174	3.3	1	3.2
BI	174	6.9	1	10.4
BI	174	0	4	0
BI	174	3.3	4	1.6
BI	174	6.9	4	3.2
BI	175	0	1	0.8
BI	175	3.3	1	5.5
BI	175	6.9	1	9.1
BI	175	0	4	0
BI	175	3.3	4	4
BI	175	6.9	4	2.4
BI	184	0	1	0
BI	184	3.3	1	4.7
BI	184	6.9	1	9
BI	184	0	4	0
BI	184	3.3	4	1.6
BI	184	6.9	4	2.4
BI	190	0	1	0.8
BI	190	3.3	1	3.2
BI	190	6.9	1	7.6
BI	190	0	4	0.8
BI	190	3.3	4	0.8
BI	190	6.9	4	4
BI	195	0	1	0.8
BI	195	3.3	1	2.4
BI	195	6.9	1	10.4
BI	195	0	4	0.8
BI	195	3.3	4	0.8
BI	195	6.9	4	0.8
BI	196	0	1	0.8
BI	196	3.3	1	3.9
BI	196	6.9	1	11.5
BI	196	0	4	0
BI	196	3.3	4	1.6
BI	196	6.9	4	3.1
BI	197	0	1	0.8
BI	197	3.3	1	2.5
BI	197	6.9	1	7
BI	197	0	4	0
BI	197	3.3	4	3.3
BI	197	6.9	4	4.1
BI	198	0	1	0
BI	198	3.3	1	5
BI	198	6.9	1	16.7
BI	198	0	4	0
BI	198	3.3	4	3.4
BI	198	6.9	4	6.5
BI	202	0	1	0
BI	202	3.3	1	8.3
BI	202	6.9	1	7.6
BI	202	0	4	0
BI	202	3.3	4	3.2
BI	202	6.9	4	0.8
BI	203	0	1	1.7
BI	203	3.3	1	4
BI	203	6.9	1	9.8
BI	203	0	4	0
BI	203	3.3	4	3.2
BI	203	6.9	4	4
BI	204	0	1	0
BI	204	3.3	1	4.7
BI	204	6.9	1	8.3
BI	204	0	4	0
BI	204	3.3	4	2.4
BI	204	6.9	4	5.5
BI	210	0	1	1
BI	210	3.3	1	11.4
BI	210	6.9	1	15.1
BI	210	0	4	1
BI	210	3.3	4	4.7
BI	210	6.9	4	2.9
BI	211	0	1	0
BI	211	3.3	1	4.2
BI	211	6.9	1	10.2
BI	211	0	4	0
BI	211	3.3	4	2.6
BI	211	6.9	4	2.5
BI	216	0	1	2.2
BI	216	3.3	1	4.2
BI	216	6.9	1	14.3
BI	216	0	4	0
BI	216	3.3	4	1.1
BI	216	6.9	4	4.3
BI	217	0	1	0.9
BI	217	3.3	1	3.5
BI	217	6.9	1	12.7
BI	217	0	4	0.9
BI	217	3.3	4	5.2
BI	217	6.9	4	4.4
FG	1	0	1	3.4
FG	1	3.3	1	16.2
FG	1	6.9	1	28
FG	1	0	3	3.9
FG	1	3.3	3	12.8
FG	1	6.9	3	10.5
FG	2	0	1	7.6
FG	2	3.3	1	17.5
FG	2	6.9	1	33.2
FG	2	0	3	5.8
FG	2	3.3	3	14.7
FG	2	6.9	3	12
FG	3	0	1	10
FG	3	3.3	1	16.2
FG	3	6.9	1	21.7
FG	3	0	3	6.2
FG	3	3.3	3	11.8
FG	3	6.9	3	5.8
FG	4	0	1	4.3
FG	4	3.3	1	16.3
FG	4	6.9	1	21.7
FG	4	0	3	5.2
FG	4	3.3	3	7.4
FG	4	6.9	3	7.8
FG	5	0	1	6.9
FG	5	3.3	1	16.6
FG	5	6.9	1	23.3
FG	5	0	3	4.5
FG	5	3.3	3	9.1
FG	5	6.9	3	10.5
FG	6	0	1	6.5
FG	6	3.3	1	17.1
FG	6	6.9	1	23.3
FG	6	0	3	3.1
FG	6	3.3	3	7.7
FG	6	6.9	3	11.8
FG	7	0	1	6.4
FG	7	3.3	1	17.3
FG	7	6.9	1	25.5
FG	7	0	3	1.7
FG	7	3.3	3	8.2
FG	7	6.9	3	12
FG	8	0	1	12.2
FG	8	3.3	1	26.1
FG	8	6.9	1	28.9
FG	8	0	3	8.9
FG	8	3.3	3	9.5
FG	8	6.9	3	16.8
FG	9	0	1	8.9
FG	9	3.3	1	13.1
FG	9	6.9	1	19.9
FG	9	0	3	4.4
FG	9	3.3	3	13
FG	9	6.9	3	15.5
FG	10	0	1	10.8
FG	10	3.3	1	24.5
FG	10	6.9	1	27.6
FG	10	0	3	2.1
FG	10	3.3	3	10.8
FG	10	6.9	3	11.9
ST	1	0	1	4
ST	1	3.3	1	4.8
ST	1	6.9	1	17.4
ST	1	0	3	3.2
ST	1	3.3	3	1.7
ST	1	6.9	3	7
ST	2	0	1	6.2
ST	2	3.3	1	12.5
ST	2	6.9	1	20.4
ST	2	0	3	6.2
ST	2	3.3	3	3.2
ST	2	6.9	3	7.1
ST	3	0	1	3.1
ST	3	3.3	1	10.9
ST	3	6.9	1	24.1
ST	3	0	3	4.7
ST	3	3.3	3	3.2
ST	3	6.9	3	11.5
ST	4	0	1	17.4
ST	4	3.3	1	35.8
ST	4	6.9	1	51
ST	4	0	3	4.1
ST	4	3.3	3	13.6
ST	4	6.9	3	22.8
ST	5	0	1	0
ST	5	3.3	1	7.3
ST	5	6.9	1	28.8
ST	5	0	3	5
ST	5	3.3	3	4.2
ST	5	6.9	3	5.8
ST	6	0	1	1.9
ST	6	3.3	1	12
ST	6	6.9	1	22.1
ST	6	0	3	3.8
ST	6	3.3	3	4.6
ST	6	6.9	3	5.6
ST	7	0	1	2.6
ST	7	3.3	1	0
ST	7	6.9	1	5
ST	7	0	3	7.3
ST	7	3.3	3	0
ST	7	6.9	3	11.6
ST	8	0	1	6.1
ST	8	3.3	1	34.2
ST	8	6.9	1	47.6
ST	8	0	3	1.3
ST	8	3.3	3	12.5
ST	8	6.9	3	23.2
ST	9	0	1	3.8
ST	9	3.3	1	8.3
ST	9	6.9	1	25.5
ST	9	0	3	3.8
ST	9	3.3	3	3.8
ST	9	6.9	3	8.3
ST	10	0	1	15.3
ST	10	3.3	1	29.6
ST	10	6.9	1	41.9
ST	10	0	3	13.8
ST	10	3.3	3	2
ST	10	6.9	3	21.9
ST	11	0	1	0.8
ST	11	3.3	1	5.9
ST	11	6.9	1	16.4
ST	11	0	3	0.8
ST	11	3.3	3	3.1
ST	11	6.9	3	3.8
ST	12	0	1	8.7
ST	12	3.3	1	20.2
ST	12	6.9	1	41.2
ST	12	0	3	3.1
ST	12	3.3	3	2.1
ST	12	6.9	3	14.4
ST	13	0	1	1
ST	13	3.3	1	8.4
ST	13	6.9	1	19
ST	13	0	3	3.9
ST	13	3.3	3	3
ST	13	6.9	3	6.7
ST	14	0	1	1.3
ST	14	3.3	1	10.7
ST	14	6.9	1	30.2
ST	14	0	3	8.6
ST	14	3.3	3	1.3
ST	14	6.9	3	8.6
ST	15	0	1	0
ST	15	3.3	1	11.7
ST	15	6.9	1	30
ST	15	0	3	1.1
ST	15	3.3	3	6.2
ST	15	6.9	3	6.2
ST	16	0	1	2.8
ST	16	3.3	1	16.5
ST	16	6.9	1	21.3
ST	16	0	3	0
ST	16	3.3	3	7.9
ST	16	6.9	3	11.4
ST	17	0	1	1.6
ST	17	3.3	1	1.6
ST	17	6.9	1	20
ST	17	0	3	0
ST	17	3.3	3	3.2
ST	17	6.9	3	10.4
ST	18	0	1	1.1
ST	18	3.3	1	13.8
ST	18	6.9	1	33.8
ST	18	0	3	4.1
ST	18	3.3	3	4.1
ST	18	6.9	3	6
ST	19	0	1	3
ST	19	3.3	1	24.6
ST	19	6.9	1	38.8
ST	19	0	3	1
ST	19	3.3	3	8.4
ST	19	6.9	3	20.3
ST	20	0	1	5.1
ST	20	3.3	1	13.7
ST	20	6.9	1	27.7
ST	20	0	3	2.6
ST	20	3.3	3	5.1
ST	20	6.9	3	7.4
ST	21	0	1	3.2
ST	21	3.3	1	13.3
ST	21	6.9	1	30
ST	21	0	3	3.2
ST	21	3.3	3	3.2
ST	21	6.9	3	10.8
ST	22	0	1	4
ST	22	3.3	1	13.3
ST	22	6.9	1	19.8
ST	22	0	3	4.9
ST	22	3.3	3	10.1
ST	22	6.9	3	4.9
ST	23	0	1	1.4
ST	23	3.3	1	10.3
ST	23	6.9	1	25.7
ST	23	0	3	2.1
ST	23	3.3	3	2.1
ST	23	6.9	3	6.7
ST	24	0	1	6.7
ST	24	3.3	1	9.3
ST	24	6.9	1	21
ST	24	0	3	2.9
ST	24	3.3	3	8.4
ST	24	6.9	3	6.6
ST	25	0	1	4.6
ST	25	3.3	1	12.5
ST	25	6.9	1	15.1
ST	25	0	3	4.5
ST	25	3.3	3	6
ST	25	6.9	3	4.6
ST	26	0	1	3.8
ST	26	3.3	1	9
ST	26	6.9	1	14.5
ST	26	0	3	9
ST	26	3.3	3	6.5
ST	26	6.9	3	11.4
ST	27	0	1	0.9
ST	27	3.3	1	13.6
ST	27	6.9	1	38.4
ST	27	0	3	2.6
ST	27	3.3	3	6.6
ST	27	6.9	3	10.2
ST	28	0	1	2.4
ST	28	3.3	1	8.4
ST	28	6.9	1	8.5
ST	28	0	3	3.3
ST	28	3.3	3	2.4
ST	28	6.9	3	13
ST	29	0	1	5.1
ST	29	3.3	1	9.8
ST	29	6.9	1	17.1
ST	29	0	3	7
ST	29	3.3	3	7.1
ST	29	6.9	3	8.8
ST	30	0	1	9.4
ST	30	3.3	1	19.3
ST	30	6.9	1	25
ST	30	0	3	11.1
ST	30	3.3	3	11.2
ST	30	6.9	3	13.7
ST	31	0	1	5.4
ST	31	3.3	1	5.4
ST	31	6.9	1	20.5
ST	31	0	3	3.7
ST	31	3.3	3	11
ST	31	6.9	3	17.3
ST	32	0	1	29.8
ST	32	3.3	1	45
ST	32	6.9	1	56
ST	32	0	3	19.5
ST	32	3.3	3	15
ST	32	6.9	3	24.4
ST	33	0	1	4.1
ST	33	3.3	1	4.1
ST	33	6.9	1	7.9
ST	33	0	3	4.1
ST	33	3.3	3	7.1
ST	33	6.9	3	6.1
ST	34	0	1	6.3
ST	34	3.3	1	8.5
ST	34	6.9	1	22.7
ST	34	0	3	6.3
ST	34	3.3	3	4
ST	34	6.9	3	7
ST	35	0	1	4.8
ST	35	3.3	1	9.8
ST	35	6.9	1	14.2
ST	35	0	3	5.5
ST	35	3.3	3	6.2
ST	35	6.9	3	10.4
ST	36	0	1	4.3
ST	36	3.3	1	11.4
ST	36	6.9	1	14.2
ST	36	0	3	2.7
ST	36	3.3	3	5.2
ST	36	6.9	3	13.4
ST	37	0	1	3.2
ST	37	3.3	1	7
ST	37	6.9	1	13.8
ST	37	0	3	4
ST	37	3.3	3	4.8
ST	37	6.9	3	10.5
ST	38	0	1	4.5
ST	38	3.3	1	20.5
ST	38	6.9	1	40.4
ST	38	0	3	6.2
ST	38	3.3	3	10.9
ST	38	6.9	3	11.7
ST	39	0	1	4.7
ST	39	3.3	1	17.6
ST	39	6.9	1	38.1
ST	39	0	3	2.4
ST	39	3.3	3	8.3
ST	39	6.9	3	33.5
ST	40	0	1	11.4
ST	40	3.3	1	19.6
ST	40	6.9	1	21.8
ST	40	0	3	8.2
ST	40	3.3	3	14.3
ST	40	6.9	3	18.6
ST	41	0	1	2.1
ST	41	3.3	1	10.4
ST	41	6.9	1	14.3
ST	41	0	3	0
ST	41	3.3	3	2.8
ST	41	6.9	3	6.1
ST	42	0	1	4.4
ST	42	3.3	1	23.9
ST	42	6.9	1	37.9
ST	42	0	3	0
ST	42	3.3	3	8.4
ST	42	6.9	3	18.7
ST	43	0	1	1.5
ST	43	3.3	1	12.3
ST	43	6.9	1	29.3
ST	43	0	3	2.3
ST	43	3.3	3	3
ST	43	6.9	3	11.1
ST	44	0	1	2.2
ST	44	3.3	1	5
ST	44	6.9	1	13.5
ST	44	0	3	2.9
ST	44	3.3	3	7.6
ST	44	6.9	3	7
ST	45	0	1	4.4
ST	45	3.3	1	24.3
ST	45	6.9	1	20.4
ST	45	0	3	9.1
ST	45	3.3	3	3.5
ST	45	6.9	3	11.3
ST	46	0	1	3.9
ST	46	3.3	1	15.4
ST	46	6.9	1	16.9
ST	46	0	3	2
ST	46	3.3	3	5.7
ST	46	6.9	3	5.7
ST	47	0	1	2.3
ST	47	3.3	1	8.6
ST	47	6.9	1	21.3
ST	47	0	3	3.4
ST	47	3.3	3	2.3
ST	47	6.9	3	14
ST	48	0	1	6.7
ST	48	3.3	1	25.5
ST	48	6.9	1	37.8
ST	48	0	3	2.6
ST	48	3.3	3	8.2
ST	48	6.9	3	27.5
ST	49	0	1	3.8
ST	49	3.3	1	10.6
ST	49	6.9	1	22.2
ST	49	0	3	0
ST	49	3.3	3	5.2
ST	49	6.9	3	8.6
ST	50	0	1	4
ST	50	3.3	1	9.8
ST	50	6.9	1	15.6
ST	50	0	3	4
ST	50	3.3	3	6.3
ST	50	6.9	3	9.8
ST	51	0	1	5.8
ST	51	3.3	1	11
ST	51	6.9	1	17.5
ST	51	0	3	5.8
ST	51	3.3	3	7.4
ST	51	6.9	3	11
ST	52	0	1	13
ST	52	3.3	1	26.9
ST	52	6.9	1	37.8
ST	52	0	3	4.8
ST	52	3.3	3	11.2
ST	52	6.9	3	16.8
ST	53	0	1	10.2
ST	53	3.3	1	26.4
ST	53	6.9	1	47
ST	53	0	3	2.8
ST	53	3.3	3	3.6
ST	53	6.9	3	15.1
ST	54	0	1	9.6
ST	54	3.3	1	32.4
ST	54	6.9	1	41.7
ST	54	0	3	2.1
ST	54	3.3	3	17.5
ST	54	6.9	3	21
ST	55	0	1	9.3
ST	55	3.3	1	22.2
ST	55	6.9	1	28.5
ST	55	0	3	7.6
ST	55	3.3	3	8.4
ST	55	6.9	3	23.4
ST	56	0	1	5.5
ST	56	3.3	1	9
ST	56	6.9	1	11.7
ST	56	0	3	7.6
ST	56	3.3	3	4.7
ST	56	6.9	3	7.6
ST	57	0	1	4.9
ST	57	3.3	1	16.8
ST	57	6.9	1	21.4
ST	57	0	3	7.5
ST	57	3.3	3	3.9
ST	57	6.9	3	15.5
ST	58	0	1	10.8
ST	58	3.3	1	25.6
ST	58	6.9	1	36.1
ST	58	0	3	8
ST	58	3.3	3	11.5
ST	58	6.9	3	19.6
ST	59	0	1	2.8
ST	59	3.3	1	5.4
ST	59	6.9	1	10.8
ST	59	0	3	0.7
ST	59	3.3	3	4.1
ST	59	6.9	3	3.4
ST	60	0	1	7.6
ST	60	3.3	1	15.7
ST	60	6.9	1	15
ST	60	0	3	1
ST	60	3.3	3	6.7
ST	60	6.9	3	8.6
ST	61	0	1	8
ST	61	3.3	1	12.9
ST	61	6.9	1	28.6
ST	61	0	3	6.6
ST	61	3.3	3	8.8
ST	61	6.9	3	9.4
ST	62	0	1	6.2
ST	62	3.3	1	18.1
ST	62	6.9	1	22.8
ST	62	0	3	6.2
ST	62	3.3	3	6.2
ST	62	6.9	3	10.3
ST	63	0	1	6.8
ST	63	3.3	1	27
ST	63	6.9	1	33.1
ST	63	0	3	1.8
ST	63	3.3	3	6.8
ST	63	6.9	3	8.5
ST	64	0	1	1.5
ST	64	3.3	1	6.4
ST	64	6.9	1	17.6
ST	64	0	3	0.8
ST	64	3.3	3	3.7
ST	64	6.9	3	8.5
ST	65	0	1	2.2
ST	65	3.3	1	8.3
ST	65	6.9	1	12.6
ST	65	0	3	4.3
ST	65	3.3	3	1.5
ST	65	6.9	3	6.4
ST	66	0	1	4.3
ST	66	3.3	1	13.3
ST	66	6.9	1	22.9
ST	66	0	3	4.3
ST	66	3.3	3	8.9
ST	66	6.9	3	15.8
ST	67	0	1	5.7
ST	67	3.3	1	10.2
ST	67	6.9	1	22.1
ST	67	0	3	6.5
ST	67	3.3	3	9.4
ST	67	6.9	3	14.1
ST	68	0	1	4.5
ST	68	3.3	1	15.9
ST	68	6.9	1	29.2
ST	68	0	3	3.1
ST	68	3.3	3	6.6
ST	68	6.9	3	8.6
ST	69	0	1	2.3
ST	69	3.3	1	9.6
ST	69	6.9	1	24.1
ST	69	0	3	5.6
ST	69	3.3	3	8.7
ST	69	6.9	3	6.6
ST	70	0	1	3.8
ST	70	3.3	1	7.4
ST	70	6.9	1	13.2
ST	70	0	3	5.7
ST	70	3.3	3	8.3
ST	70	6.9	3	13
ST	71	0	1	7.8
ST	71	3.3	1	6.2
ST	71	6.9	1	26.4
ST	71	0	3	4.5
ST	71	3.3	3	11.8
ST	71	6.9	3	12.4
ST	72	0	1	12.8
ST	72	3.3	1	28.7
ST	72	6.9	1	22.3
ST	72	0	3	5.6
ST	72	3.3	3	11.4
ST	72	6.9	3	20.5
ST	73	0	1	5.4
ST	73	3.3	1	18.1
ST	73	6.9	1	24.7
ST	73	0	3	1.6
ST	73	3.3	3	3.2
ST	73	6.9	3	10.9
ST	74	0	1	10.3
ST	74	3.3	1	10.3
ST	74	6.9	1	31.4
ST	74	0	3	10.3
ST	74	3.3	3	8.6
ST	74	6.9	3	17.4
ST	75	0	1	6
ST	75	3.3	1	21.7
ST	75	6.9	1	24.2
ST	75	0	3	6.9
ST	75	3.3	3	10.5
ST	75	6.9	3	19.7
ST	76	0	1	8.6
ST	76	3.3	1	11.8
ST	76	6.9	1	35
ST	76	0	3	10.2
ST	76	3.3	3	7.8
ST	76	6.9	3	16.5
ST	77	0	1	11.5
ST	77	3.3	1	12.9
ST	77	6.9	1	27.5
ST	77	0	3	8.5
ST	77	3.3	3	11.4
ST	77	6.9	3	13.6
ST	78	0	1	4.3
ST	78	3.3	1	14.2
ST	78	6.9	1	28.6
ST	78	0	3	1.5
ST	78	3.3	3	6.4
ST	78	6.9	3	9.5
ST	79	0	1	12.2
ST	79	3.3	1	19.6
ST	79	6.9	1	31.4
ST	79	0	3	7.9
ST	79	3.3	3	14.8
ST	79	6.9	3	14.7
ST	80	0	1	35.7
ST	80	3.3	1	65.3
ST	80	6.9	1	40
ST	80	0	3	25
ST	80	3.3	3	40
ST	80	6.9	3	45.5
ST	81	0	1	10.4
ST	81	3.3	1	11.9
ST	81	6.9	1	18.9
ST	81	0	3	3.2
ST	81	3.3	3	3.3
ST	81	6.9	3	9.8
ST	82	0	1	25.7
ST	82	3.3	1	50.9
ST	82	6.9	1	49.7
ST	82	0	3	10.5
ST	82	3.3	3	14.1
ST	82	6.9	3	25.4
ST	83	0	1	5.5
ST	83	3.3	1	24.3
ST	83	6.9	1	36
ST	83	0	3	7.2
ST	83	3.3	3	7.2
ST	83	6.9	3	18.3
ST	84	0	1	9.9
ST	84	3.3	1	24.2
ST	84	6.9	1	29.1
ST	84	0	3	9.1
ST	84	3.3	3	11.5
ST	84	6.9	3	20
