# Supplementary material for: Single caudate neurons encode temporally discounted value for formulating motivation for action
Source: eLife. 2021 Jul 30;10:e61248. doi: 10.7554/eLife.61248 (PMC8352586; doi:10.7554/eLife.61248)
Supplement: Figure 5—source data 1. [file elife-61248-fig5-data1.xls]

## Sheet: B_cue sort
condition	event	cell	-500	-490	-480	-470	-460	-450	-440	-430	-420	-410	-400	-390	-380	-370	-360	-350	-340	-330	-320	-310	-300	-290	-280	-270	-260	-250	-240	-230	-220	-210	-200	-190	-180	-170	-160	-150	-140	-130	-120	-110	-100	-90	-80	-70	-60	-50	-40
non-dv	cue	1	0.0026	0.0037	0.0014	0.0018	0.0026	0.0021	0.0021	0.0013	0.0032	0.0014	0.0003	0.002	0.0007	0.0002	0.0001	0.0002	0	0.0007	0.0002	0.0001	0	0.0002	0.0003	0.0005	0.0011	0.0022	0.0029	0.0018	0.0034	0.0009	0	0.0049	0.0041	0.0018	0.0018	0.0024	0.0005	0.0003	0.0001	0.0003	0.0001	0.0032	0.0018	0.0122	0.0075	0.0134	0.0021
non-dv	cue	2	0	0	0.0002	0.0003	0.0031	0	0.0001	0	0.0004	0.0001	0.0029	0.0058	0.0128	0.0061	0.0017	0.0002	0.0013	0.001	0	0.0003	0.0004	0	0	0	0.0019	0.0019	0.0047	0.0033	0.0034	0.0009	0.0004	0.0008	0.0024	0.0015	0.0044	0.0043	0.0119	0.0101	0.0073	0.0111	0.0152	0.0096	0.0021	0.0036	0	0	0.001
non-dv	cue	3	0.0404	0.0203	0.0148	0.0028	0.0003	0.0001	0.0004	0.0017	0.0041	0.0041	0.0114	0.0189	0.0237	0.0234	0.0283	0.046	0.0305	0.0178	0.0257	0.0286	0.0382	0.0275	0.0303	0.0259	0.0246	0.0134	0.0141	0.0204	0.022	0.0237	0.0181	0.0127	0.0095	0.0116	0.0074	0.01	0.0172	0.0294	0.0302	0.0337	0.0304	0.0231	0.0254	0.0282	0.0316	0.0354	0.0312
non-dv	cue	4	0.0005	0.0031	0.0004	0.0004	0.0043	0.0001	0.0001	0.0012	0.0007	0.0021	0.0005	0.0028	0.0001	0.0002	0.0003	0.0002	0	0.0002	0.0002	0.0002	0.0017	0.0001	0.0004	0.0008	0.0037	0.0027	0.0027	0.0027	0.0069	0.0129	0.0111	0.0208	0.0199	0.0159	0.0159	0.0113	0.0115	0.0034	0.0031	0.0046	0.0105	0.0095	0.0076	0.0054	0.0051	0.0043	0.0039
non-dv	cue	5	0.0327	0.0289	0.028	0.0328	0.033	0.0256	0.0161	0.013	0.0034	0.0055	0.0032	0.0019	0.0006	0.0001	0	0.0003	0.0018	0.0012	0.0011	0.0027	0.0026	0.0037	0.0055	0.0059	0.0035	0.0046	0.0049	0.005	0.0029	0.0037	0.0033	0.0034	0.0035	0.0031	0.0031	0.0041	0.0032	0.0065	0.0059	0.0047	0.0041	0.001	0	0.0004	0.0045	0.0023	0.0013
non-dv	cue	6	0.0244	0.0243	0.026	0.0244	0.0275	0.018	0.0195	0.0072	0.0038	0.0099	0.0099	0.0106	0.0048	0.0008	0.0047	0.0047	0.0008	0.0021	0.001	0.0009	0.0003	0.0025	0.0015	0.0017	0.0012	0.0004	0.001	0.0017	0.0017	0.0079	0.0115	0.0155	0.018	0.0174	0.0198	0.0191	0.0197	0.0204	0.0194	0.0263	0.0268	0.0242	0.0271	0.0307	0.0215	0.0237	0.0186
non-dv	cue	7	0.0003	0.0003	0.0003	0.0005	0.0005	0.0016	0	0	0.0005	0.0005	0	0	0.0001	0.0025	0.0013	0.0013	0.0013	0.0002	0.0005	0.0009	0.0005	0.0005	0.0005	0.0007	0.0002	0.0005	0.0005	0.0006	0.0014	0.0013	0.0013	0.0013	0.0008	0.0022	0.0028	0.0028	0.0004	0.0003	0.0004	0.0004	0.0008	0.0008	0.0005	0.0005	0.0008	0.0008	0
non-dv	cue	8	0.0139	0.0163	0.0219	0.0255	0.0173	0.0182	0.0208	0.0159	0.0208	0.0252	0.0194	0.0131	0.0098	0.0109	0.0105	0.0145	0.0061	0.0035	0.0059	0.0041	0.0051	0.0028	0.004	0.0053	0.0089	0.008	0.0051	0.0054	0.004	0.0009	0.0004	0.0006	0.0003	0.0001	0.0001	0.0002	0.0001	0.0001	0	0.0006	0.0002	0.006	0.0042	0.0004	0.0018	0.0051	0.0031
non-dv	cue	9	0.0004	0.0034	0.0045	0.0045	0.003	0.016	0.016	0.0029	0.0008	0.0028	0.0106	0.0071	0.0071	0.0051	0.0115	0.0115	0.0286	0.0286	0.0275	0.0228	0.0172	0.0178	0.0164	0.0129	0.012	0.0048	0.0075	0.0055	0.002	0.0007	0.0001	0	0	0	0.0006	0.0012	0.0027	0.0053	0.0046	0.0055	0.0037	0.0014	0.003	0.0001	0.0002	0.0001	0.0006
non-dv	cue	10	0.0027	0.0019	0.0006	0.0017	0.0003	0.0011	0.0005	0.0033	0.005	0.0024	0.0033	0.004	0.0033	0.0016	0.0013	0.0003	0.0001	0	0.0002	0.0003	0.0002	0.0012	0	0.0004	0.0001	0.0002	0.0003	0	0.0006	0.0001	0	0	0.0001	0.0001	0.0001	0.0003	0	0	0.0001	0.0001	0	0.0006	0.0004	0.0003	0.0004	0	0.0011
non-dv	cue	11	0.011	0.0058	0.0028	0.0035	0.0065	0.0072	0.0054	0.0097	0.0083	0.0113	0.0122	0.0138	0.0108	0.0068	0.0081	0.0065	0.0176	0.0154	0.025	0.0279	0.0326	0.0376	0.0406	0.0435	0.0311	0.0334	0.0353	0.0246	0.027	0.0219	0.0153	0.0168	0.0134	0.0134	0.0134	0.0117	0.0033	0.0036	0.0006	0	0.0004	0.0014	0.0021	0.0042	0.0019	0.0016	0.0074
non-dv	cue	12	0.0079	0.0003	0.0001	0.0021	0.0062	0.0065	0.007	0.0098	0.0098	0.0098	0.0058	0.0059	0.0037	0.0001	0	0	0	0	0.0001	0.0024	0.0041	0.0007	0.0001	0.0017	0.0123	0.021	0.0218	0.023	0.023	0.0205	0.0217	0.0248	0.0183	0.0066	0.0092	0.0073	0.0039	0.0029	0.0034	0	0.0033	0.003	0.0042	0.0042	0.0187	0.0294	0.02
non-dv	cue	13	0.0063	0.0086	0.0087	0.0109	0.007	0.0105	0.0078	0.0068	0.0012	0.0001	0.0004	0.0017	0.0013	0.005	0.0088	0.0107	0.0097	0.0013	0	0.0007	0	0.0001	0	0.0009	0	0.0019	0.0007	0.0001	0.0004	0.0005	0.0002	0.0001	0.0009	0.0002	0.0004	0.0074	0.0181	0.0057	0.0036	0	0.0006	0.0027	0.0027	0.0109	0.0099	0.0163	0.0072
non-dv	cue	14	0.003	0.0057	0.0077	0.0067	0.0108	0.0088	0.0109	0.02	0.0139	0.0069	0.0074	0.0052	0	0.0003	0.0007	0.0021	0.0036	0.0049	0.0049	0.0062	0.0094	0.0128	0.0175	0.0282	0.0251	0.0252	0.0277	0.0323	0.0372	0.0358	0.0375	0.0381	0.0358	0.0332	0.035	0.025	0.02	0.0169	0.0182	0.0202	0.0124	0.0125	0.0174	0.0075	0.008	0.0057	0.0065
non-dv	cue	15	0	0	0.0001	0	0.0022	0.0001	0.0026	0.0076	0.0039	0.0039	0.0006	0	0	0.0004	0.0028	0.0019	0.004	0.0041	0.0068	0.0049	0.004	0.0045	0.0058	0.0056	0.0109	0.012	0.0108	0.0082	0.0048	0.0034	0.0006	0	0.0003	0.0014	0.0009	0.0004	0.0001	0.0001	0	0	0	0.0001	0.0002	0	0	0.0001	0.0003
non-dv	cue	16	0.0082	0.0055	0.0055	0.0055	0.0055	0.0055	0.0055	0.0055	0.0055	0.0055	0.0028	0.0028	0.0028	0.0028	0.0028	0.0028	0.0028	0.0028	0.0028	0.0002	0.0008	0.0079	0.0079	0.0079	0.0079	0.0079	0.0079	0.0079	0.0079	0.0079	0.0019	0.0019	0.0019	0.0019	0.0019	0.0019	0.0019	0.0003	0.0003	0.0003	0	0.0094	0	0	0	0	0
non-dv	cue	17	0.0056	0.0051	0.0041	0.0028	0.0031	0.0038	0.0111	0.0157	0.0204	0.0203	0.024	0.0263	0.0082	0.0084	0.0045	0.0051	0.0028	0.0033	0.0033	0.0018	0	0	0	0	0	0	0.0001	0.0001	0	0	0.001	0.0011	0.0001	0.001	0.0004	0.0009	0.0035	0.0016	0.0032	0.003	0.0056	0.0029	0.0028	0.0017	0.0024	0.0016	0.0006
non-dv	cue	18	0.0129	0.0127	0.0145	0.0197	0.0216	0.0198	0.0174	0.0156	0.0147	0.0147	0.0169	0.0124	0.0102	0.0075	0.0107	0.0124	0.0136	0.0126	0.0121	0.0188	0.0139	0.0177	0.0132	0.0107	0.0092	0.0128	0.0188	0.0221	0.0215	0.0247	0.0209	0.0251	0.0251	0.0191	0.0119	0.0024	0	0	0.0006	0.0018	0.0018	0.0001	0.0018	0.0021	0.0034	0.0031	0.0052
non-dv	cue	19	0.0225	0.0167	0.0141	0.0123	0.0107	0.0069	0.0094	0.0084	0.0092	0.0089	0.0027	0.0031	0.002	0.0001	0.001	0.0012	0.0044	0.0021	0.0042	0.005	0.0135	0.0278	0.0353	0.0274	0.0186	0.027	0.0356	0.0425	0.0349	0.0337	0.036	0.0336	0.0291	0.0372	0.0258	0.0318	0.0337	0.0499	0.0441	0.0246	0.0266	0.0205	0.0094	0.01	0.0091	0.0043	0.0001
non-dv	cue	20	0.0133	0.0141	0.0141	0.0127	0.014	0.0115	0.0114	0.0114	0.017	0.017	0.017	0.0162	0.0132	0.0164	0.0164	0.0116	0.0122	0.0037	0.0038	0.005	0.0044	0.0044	0.0044	0.0031	0.0018	0.0015	0.0015	0.0001	0.0014	0.0016	0.0016	0.0016	0.0017	0.0043	0.0034	0.0005	0.0033	0	0	0.0006	0.0005	0.0014	0.0014	0.005	0.0175	0.0169	0.0169
non-dv	cue	21	0.0261	0.0261	0.0321	0.0194	0.0194	0.0132	0.0072	0.0097	0.0027	0	0	0.0001	0.0001	0.0001	0.0011	0.0011	0.0017	0.0017	0.0021	0.0021	0.0021	0.0021	0.011	0.0147	0.0147	0.0126	0.0126	0.0126	0.0126	0.0075	0.0075	0.0075	0.0075	0.0075	0.0034	0.0034	0.0046	0.0046	0.0046	0.0046	0.0046	0.0046	0.0051	0.0011	0.0011	0.0011	0.0011
non-dv	cue	22	0.0104	0.0109	0.0078	0.0054	0.0106	0.01	0.0212	0.0213	0.0218	0.0304	0.0232	0.0212	0.0138	0.0192	0.0175	0.0097	0.0077	0.0099	0.0188	0.0126	0.0126	0.0078	0.0121	0.0246	0.0259	0.0219	0.0122	0.0086	0.0063	0.0077	0.0027	0.0039	0.0034	0.0008	0.0002	0.0029	0.0035	0.0021	0.0006	0.0026	0.0005	0.002	0.0022	0.0004	0	0.0004	0.0022
non-dv	cue	23	0.0034	0.0003	0.0009	0.0018	0.0064	0.002	0.0006	0.001	0.001	0.0027	0	0.0033	0.0031	0.0042	0.003	0.0119	0.0187	0.0187	0.0244	0.024	0.0138	0.0264	0.0274	0.0327	0.0377	0.0264	0.0292	0.0408	0.0318	0.0422	0.0458	0.0156	0.0058	0.0057	0.0204	0.0057	0	0	0	0.0012	0.0063	0.0052	0.0078	0.0041	0.0008	0.0026	0.0044
non-dv	cue	24	0.0032	0.0032	0.004	0.002	0.0029	0.0023	0.0003	0.0012	0.0009	0.0003	0.0001	0.0022	0.001	0.0009	0.0009	0.0023	0.0023	0.0025	0.004	0.004	0.004	0.004	0.0023	0.0019	0.0043	0.0099	0.0033	0.0025	0.0058	0.0046	0.0028	0.0004	0.0003	0.0077	0.007	0.0095	0.0026	0.0005	0.0015	0.0001	0.0003	0.0013	0	0.0001	0.0005	0.0008	0.0006
non-dv	cue	25	0.0132	0.0132	0.0067	0.0051	0.0029	0.0017	0.0013	0	0	0.0006	0.0022	0.0039	0.0037	0.0022	0.0063	0.0121	0.013	0.0124	0.0106	0.0163	0.0103	0.0124	0.0125	0.0118	0.0148	0.0148	0.0206	0.0309	0.0322	0.0252	0.039	0.0301	0.0484	0.0493	0.0182	0.0199	0.0162	0.0123	0.0118	0.0123	0.0174	0.0387	0.0403	0.0538	0.0401	0.0371	0.0336
non-dv	cue	26	0.0022	0.0001	0.0001	0.0001	0	0	0.0003	0.0003	0.0001	0.0002	0.0002	0	0.0002	0.0003	0.0021	0.0062	0.0096	0.0098	0.008	0.0086	0.0086	0.0128	0.0126	0.0126	0.0076	0.0085	0.0083	0.0092	0.011	0.0113	0.0113	0.0113	0.0099	0.0097	0.0108	0.0103	0.0105	0.0129	0.0089	0.0087	0.0139	0.0162	0.0189	0.0133	0.0178	0.014	0.0145
non-dv	cue	27	0.0006	0.0007	0.0005	0.0002	0.0048	0.0025	0.0012	0.0005	0.0001	0.0006	0.0002	0	0.0005	0.0013	0.0012	0.001	0.0014	0.0051	0.0065	0.0069	0.0086	0.0075	0.0073	0.0081	0.0112	0.0104	0.0072	0.0049	0.0062	0.0107	0.0133	0.02	0.0174	0.0128	0.0172	0.0173	0.0106	0.0051	0.0023	0.0009	0.001	0.0005	0.0004	0	0.0007	0.0006	0.0034
non-dv	cue	28	0.0004	0.0009	0.0012	0.0031	0.0022	0.0012	0.0014	0.0011	0.0032	0.0026	0.003	0.0035	0.0021	0.0032	0.0012	0.0012	0.0014	0.0014	0.0033	0.0073	0.0122	0.0066	0.0077	0.0049	0.0037	0.0035	0.0032	0.0024	0.001	0.0043	0.0042	0.0037	0.0069	0.0063	0.0118	0.0149	0.0194	0.0169	0.028	0.0238	0.0188	0.0176	0.0141	0.0142	0.0161	0.015	0.0171
non-dv	cue	29	0.0054	0.0079	0.0077	0.0114	0.0088	0.0351	0.0351	0.0434	0.0499	0.0364	0.0328	0.0375	0.0416	0.0416	0.0416	0.045	0.0386	0.0401	0.039	0.0277	0.0277	0.0264	0.0262	0.0212	0.0227	0.0066	0.0066	0.0073	0.0101	0.0101	0.0093	0.0124	0	0	0	0	0.0008	0.0069	0.0069	0.0068	0.0068	0.0093	0.0044	0.0093	0.0093	0.0093	0.0093
non-dv	cue	30	0.0055	0.0023	0.0001	0.0007	0.0033	0.0043	0.0064	0.0056	0.0039	0.0048	0.0037	0.0074	0.0052	0.0043	0.0067	0.0077	0.0125	0.0173	0.0133	0.0143	0.0143	0.0211	0.02	0.0184	0.0148	0.0186	0.0196	0.0253	0.031	0.0244	0.0236	0.0166	0.0176	0.0186	0.0134	0.0158	0.0118	0.0112	0.0117	0.0156	0.0118	0.009	0.007	0.0086	0.0122	0.0075	0.0048
non-dv	cue	31	0.0071	0.0057	0.007	0.0089	0.0101	0.0104	0.0061	0.0017	0.0004	0.0009	0.0037	0.0018	0.0036	0.0018	0.0002	0.0017	0.0011	0.0006	0.0005	0.0006	0.0022	0.0014	0.0053	0.0116	0.0094	0.0094	0.0025	0.0028	0.0005	0.0001	0	0.0007	0.0011	0.0004	0.001	0.0013	0.0001	0.0001	0.0013	0	0	0	0.0006	0.0008	0.0007	0.0006	0
non-dv	cue	32	0.0098	0.0099	0.0087	0.0046	0.0084	0.0067	0.0073	0.0102	0.0189	0.0169	0.0105	0.0062	0.0024	0.002	0.0036	0.0018	0.0005	0.0007	0.0021	0.0006	0.0007	0.0004	0.0004	0.0064	0.0022	0.0022	0.0025	0	0.0022	0.0013	0.0009	0.001	0.0036	0.0002	0.0009	0.0003	0.0002	0.0023	0.0003	0.0017	0.0026	0.0023	0.0017	0	0	0.0011	0.0017
non-dv	cue	33	0.0002	0.0005	0.0016	0.0012	0.0019	0.0022	0.0048	0.0044	0.0057	0.0062	0.0074	0.0075	0.0063	0.0033	0.0018	0.0012	0.0001	0.0027	0.0059	0.0098	0.0056	0.0057	0.0035	0.0057	0.0136	0.0123	0.0154	0.0111	0.0098	0.0234	0.0283	0.0289	0.0285	0.0316	0.0299	0.0339	0.0262	0.0091	0.0121	0.0139	0.0232	0.0199	0.0209	0.0204	0.0176	0.0168	0.018
non-dv	cue	34	0.0051	0.0005	0.0003	0.0019	0.0013	0.0016	0.0029	0.0031	0.0033	0.0007	0	0.001	0	0.0018	0.0033	0.0003	0.0031	0.0049	0.0116	0.0087	0.0134	0.0063	0.0065	0.0161	0.0118	0.013	0.0134	0.0093	0.0068	0.0082	0.008	0.0105	0.0024	0.0017	0.0022	0.0038	0.0002	0.0007	0	0.003	0.0096	0.008	0.0134	0.012	0.0092	0.0056	0.002
non-dv	cue	35	0.0188	0.011	0.011	0.0092	0.0113	0.0116	0.0114	0.0073	0.0075	0.008	0.0099	0.009	0.0069	0.0061	0.001	0.0001	0.0003	0.0002	0	0.0018	0.003	0.001	0.0008	0.0009	0.0006	0.0003	0.0001	0	0	0	0.0001	0	0.0007	0	0.0046	0.0019	0.0009	0	0.0016	0.0018	0.0005	0.0004	0.0003	0.0003	0.0004	0	0.0009
non-dv	cue	36	0.0034	0.0047	0.0047	0.0034	0.0008	0.001	0	0.0008	0.0019	0.0039	0.0145	0.0116	0.0147	0.0136	0.0142	0.0152	0.0151	0.0115	0.0089	0.0089	0.0072	0.0131	0.0129	0.0129	0.01	0.0108	0.0055	0.003	0.0046	0.0027	0.0001	0.0003	0.0001	0.0013	0.0011	0.0003	0.0002	0.0001	0.0001	0.0008	0.0043	0.0006	0.0031	0.0143	0.0086	0.009	0.0102
non-dv	cue	37	0.0024	0.0001	0.0001	0	0	0	0	0	0	0.0017	0.006	0.0054	0.0064	0.0076	0.0069	0.0042	0.003	0.0036	0.0033	0.0038	0.0038	0.01	0.01	0.012	0.0112	0.0091	0.0067	0.0069	0.0064	0.001	0.002	0.0023	0.0032	0.0032	0.003	0.0032	0.0037	0.0018	0.0011	0.001	0.0011	0.0011	0.0011	0.001	0.0027	0.0001	0
non-dv	cue	38	0.0119	0.0057	0.0034	0.0034	0.0034	0.006	0.008	0.0053	0.0073	0.0025	0.0018	0.0045	0.0029	0.0015	0.0019	0.0003	0	0	0.0002	0.0001	0.0014	0.0014	0.0014	0.0009	0.0023	0.0022	0.0057	0.0021	0.0004	0.0006	0.0003	0.0014	0.0015	0	0	0.0004	0.0037	0.004	0.0043	0.0033	0.0064	0.0113	0.0111	0.0038	0.007	0.0075	0.0105
non-dv	cue	39	0.0063	0.0056	0.0093	0.0084	0.0102	0.0079	0.0038	0.0048	0.007	0.004	0.004	0.0057	0.0031	0.0031	0.0015	0.004	0.004	0.0083	0.0026	0.0044	0.008	0.0008	0.0001	0.001	0.001	0.0001	0.0005	0	0.0007	0.0002	0.0002	0.0001	0.0029	0.0031	0.0062	0.0062	0.0062	0.0062	0.0081	0.0081	0.0147	0.0148	0.0201	0.0319	0.0319	0.028	0.0255
non-dv	cue	40	0.0001	0.0002	0	0.0001	0.0071	0.0079	0.0051	0.0113	0.0099	0.0058	0.0104	0.0267	0.0189	0.0111	0.02	0.0307	0.0171	0.0208	0.0244	0.0336	0.0539	0.0587	0.0474	0.0445	0.0317	0.0403	0.0346	0.0182	0.0182	0.0174	0.0174	0.0054	0.0068	0.0047	0.0085	0.0018	0.002	0.0017	0.0025	0.0017	0.0001	0	0	0	0.0003	0.0031	0.0022
non-dv	cue	41	0.0005	0.0001	0.0006	0.0006	0.0065	0.0043	0.0062	0.0064	0.003	0.0045	0.0005	0.0027	0.0005	0.0003	0.0003	0.0008	0.0009	0.0009	0.0038	0.004	0.004	0.0092	0.0051	0.0051	0.0011	0.0019	0.0019	0.0023	0.0109	0.0139	0.0232	0.0058	0.0058	0.0084	0.0007	0.0007	0.0001	0.0005	0.0022	0.0028	0	0	0	0	0.0003	0.0051	0.0051
non-dv	cue	42	0.0126	0.0096	0.0101	0.0106	0.0109	0.0109	0.0077	0.0071	0.0055	0.0058	0.0075	0.0098	0.0094	0.0096	0.0102	0.0093	0.0044	0.004	0.0037	0.0026	0.0026	0.0058	0.0048	0.0039	0.003	0	0.0006	0.0017	0.0065	0.0085	0.0135	0.0144	0.0179	0.0179	0.0195	0.0205	0.023	0.0224	0.0248	0.0266	0.0329	0.0357	0.0433	0.0426	0.0426	0.0379	0.0357
non-dv	cue	43	0.0432	0.0375	0.0188	0.02	0.0171	0.0193	0.0125	0.016	0.0093	0.0069	0.0064	0.0074	0.0046	0.002	0.0022	0.0019	0	0.0017	0.0004	0.0002	0	0.0006	0.0007	0.0011	0.001	0.0011	0.0015	0.0006	0.0078	0.0093	0.0073	0.0063	0.0056	0.0098	0.0063	0.0032	0.0105	0.0086	0.0107	0.0123	0.0086	0.0081	0.0137	0.0089	0.0109	0.0088	0.0111
non-dv	cue	44	0.011	0.0181	0.0153	0.012	0.0122	0.0194	0.0276	0.0271	0.0243	0.0256	0.0252	0.024	0.0272	0.0255	0.027	0.027	0.027	0.0281	0.0262	0.0232	0.0159	0.0092	0.0083	0.0055	0.0023	0.0011	0	0.0001	0.0001	0.0004	0.0057	0.0057	0.0056	0.0054	0.0068	0.0084	0.0155	0.0234	0.0227	0.0222	0.0098	0.0115	0.0116	0.011	0.0072	0.009	0.0026
non-dv	cue	45	0.0191	0.021	0.0172	0.0188	0.0178	0.0211	0.0193	0.0145	0.017	0.0251	0.0257	0.0299	0.0215	0.0202	0.013	0.0047	0.0039	0.001	0	0.0016	0	0.0008	0.0002	0.0001	0.0025	0.0059	0.0024	0.0036	0.0047	0.0027	0.0015	0.0002	0.0005	0	0.0006	0.0012	0.0005	0.0018	0.0015	0.0016	0.0011	0.0001	0.0009	0.0001	0.0005	0.0027	0.0002
non-dv	cue	46	0.0102	0.0066	0.0034	0.0029	0.0058	0.0081	0.0053	0.0091	0.0093	0.019	0.0084	0.0106	0.0112	0.0127	0.0109	0.0167	0.0082	0.0079	0.0013	0.0028	0.0105	0.0132	0.0104	0.002	0.0001	0.0003	0.0033	0.0057	0.0037	0.0047	0.0002	0.0015	0.0022	0.0081	0.0099	0.0068	0.0062	0.0117	0.0055	0.0091	0.0107	0.0146	0.0088	0.0015	0.0003	0.0012	0.0002
non-dv	cue	47	0.0004	0.0004	0.0019	0.0033	0.0062	0.006	0.0057	0.0059	0.0048	0.0052	0.0067	0.0068	0.0089	0.0071	0.0049	0.0052	0.0054	0.0061	0.0037	0.003	0.0039	0.0038	0.003	0.0026	0.0023	0.0005	0	0.0001	0.0001	0.0002	0.0001	0	0.0017	0.0017	0.0018	0.0022	0.0004	0.0005	0.0005	0.0005	0.0006	0.0002	0.0003	0.0003	0.0003	0.0015	0.0014
non-dv	cue	48	0.0212	0.0219	0.0219	0.0219	0.0195	0.0218	0.017	0.0199	0.0232	0.0038	0.0021	0.0021	0.0003	0.0006	0.001	0.001	0.001	0.001	0.001	0	0	0	0.001	0.0002	0.0001	0.0001	0.0001	0.0022	0.0096	0.0024	0.0009	0.0009	0.0009	0.0015	0.002	0.0004	0.0004	0.0004	0.0004	0.0003	0.0007	0.0007	0.0018	0.0018	0.0005	0.0005	0.0004
non-dv	cue	49	0.0114	0.0068	0.0109	0.0094	0.0079	0.0058	0.0075	0.0119	0.0128	0.0145	0.0156	0.018	0.0198	0.0136	0.0147	0.0131	0.007	0.0054	0.0053	0.0073	0.0037	0.0073	0.0035	0.0018	0.0026	0.0021	0.002	0.0031	0.0014	0.0007	0.0001	0	0.0001	0.0004	0.0002	0.0021	0.0011	0	0.0005	0.0009	0.0024	0.0058	0.0169	0.0092	0.008	0.0084	0.0073
non-dv	cue	50	0.006	0.0075	0.0061	0.0026	0.0034	0.0045	0.0045	0.0062	0.0033	0.0073	0.0004	0.0018	0.0041	0.0066	0.0041	0.0006	0.0017	0.0007	0.0009	0.0005	0.001	0.0001	0.0009	0.0004	0	0.0003	0.0003	0.0013	0.001	0.0011	0	0.0011	0.0032	0.0065	0.0081	0.0072	0.0085	0.0053	0.0039	0.0028	0.0024	0.0025	0.0033	0.0054	0.002	0.003	0.0021
non-dv	cue	51	0.0202	0.0194	0.0176	0.0229	0.0242	0.025	0.0277	0.023	0.0181	0.0178	0.0218	0.0146	0.0224	0.0256	0.0221	0.0189	0.0174	0.0158	0.0146	0.017	0.0182	0.0202	0.0196	0.0222	0.0188	0.0175	0.0143	0.0167	0.016	0.0165	0.0155	0.0191	0.0162	0.0169	0.0184	0.0185	0.0172	0.0173	0.0161	0.0166	0.0164	0.0143	0.0179	0.0161	0.0163	0.0196	0.0149
non-dv	cue	52	0.0373	0.011	0.0116	0.0148	0.0096	0.0083	0.0052	0.0084	0.0133	0.0119	0.0015	0.0087	0.0193	0.0103	0.0118	0.01	0.0119	0.0027	0.0092	0.0058	0.0038	0.0107	0.0069	0.0134	0.0066	0.0027	0.0001	0.0013	0.0005	0.0001	0.0017	0.0018	0.0035	0.0006	0.0004	0.0021	0.0004	0	0.0018	0.0013	0.0024	0.0008	0.0011	0.0022	0.0001	0.003	0.0118
non-dv	cue	53	0.0001	0.0002	0.0015	0.0022	0.0037	0.0015	0	0.0012	0	0	0.0007	0.0055	0.0037	0.0038	0.0002	0.0002	0	0.0014	0.0025	0.0027	0.0022	0.0012	0.0001	0.0006	0.0032	0.0038	0.0014	0.0016	0.0014	0.0002	0.0018	0.0055	0.0088	0.0155	0.0143	0.0088	0.0108	0.0059	0.0034	0.002	0.0023	0.0016	0.0063	0.0057	0.0037	0.0038	0.0023
non-dv	cue	54	0.0008	0.0009	0.0015	0.0051	0.0052	0.0002	0.0019	0.0013	0.0045	0.0052	0.0015	0.0002	0.0002	0	0.0029	0.0079	0.0094	0.0093	0.0096	0.0128	0.009	0.0081	0.0096	0.0097	0.0086	0.029	0.012	0.0081	0.0093	0.0109	0.0192	0.0122	0.0147	0.0209	0.0158	0.023	0.0187	0.0205	0.0079	0.0047	0.0081	0.0148	0.0127	0.0041	0	0.0054	0
non-dv	cue	55	0.002	0.0029	0.0021	0.0018	0.0002	0.0003	0.0001	0.0002	0.0001	0.0001	0.0008	0.001	0.0015	0.0041	0.0019	0.0009	0.0009	0.0001	0.0001	0.0001	0	0.0015	0	0.0001	0	0.0014	0.0028	0.0011	0.0011	0.0011	0.0006	0.0001	0.0002	0.0083	0.0092	0.0171	0.0178	0.0178	0.0128	0.021	0.0185	0.0243	0.0228	0.0251	0.0292	0.0292	0.0364
non-dv	cue	56	0.0098	0.0082	0.0065	0.0065	0.011	0.0076	0.0077	0.0056	0.0004	0.0004	0.0001	0.0005	0.0045	0.0041	0.0051	0.005	0.0051	0.0063	0.0063	0.0045	0.0045	0.004	0.0035	0.0036	0.0043	0.0056	0.0103	0.0106	0.011	0.011	0.011	0.011	0.0091	0.0091	0.0086	0.012	0.0103	0.0093	0.0093	0.0105	0.0105	0.0105	0.01	0.0096	0.0081	0.0076	0.0068
non-dv	cue	57	0.0007	0.0006	0.0002	0.0009	0.0003	0.0003	0.0001	0	0	0	0.0001	0.0009	0.0005	0.0009	0.0007	0.0001	0.0001	0.0002	0	0.0004	0.0001	0	0	0.0001	0	0	0.0004	0.0002	0.0012	0.001	0.002	0.0019	0.0016	0.0011	0.0015	0.0029	0.0042	0.0037	0.002	0.0015	0.0025	0.005	0.0084	0.0089	0.0088	0.0089	0.0071
non-dv	cue	58	0	0.0001	0	0.0008	0.0009	0.0019	0.0018	0.0012	0.0008	0.0001	0.0002	0.0001	0.0004	0.0004	0.0001	0	0	0.0001	0.0023	0.002	0.0081	0.0047	0.0035	0.0013	0.0012	0.0025	0.0012	0.003	0.0017	0	0	0.0002	0.002	0.0011	0.0002	0.0001	0	0.0004	0.0034	0.0025	0.0031	0.0022	0.0001	0.001	0.0004	0.0005	0.0004
non-dv	cue	59	0.0009	0.0001	0.0002	0.0001	0.0005	0.0003	0	0.0002	0	0	0.0004	0.002	0.0001	0.0002	0	0.0013	0.003	0.0026	0.0011	0.0055	0.0115	0.0055	0.0098	0.0141	0.0168	0.023	0.0429	0.0461	0.0326	0.0412	0.039	0.0185	0.0252	0.0215	0.0205	0.0149	0.0096	0.0085	0.0078	0.0089	0.0068	0.0067	0.0075	0.0062	0.0048	0.0027	0.0004
non-dv	cue	60	0	0.0001	0.0001	0.0002	0.0002	0.0001	0	0	0.0001	0	0.0006	0.0011	0.0039	0.0027	0.0043	0.0049	0.0057	0.0022	0.0043	0.0078	0.0062	0.0055	0.0032	0.003	0.0024	0.0018	0	0	0.0001	0.0002	0.0007	0.0025	0.0023	0.0017	0.0018	0.0052	0.0061	0.002	0.0091	0.0123	0.0113	0.0118	0.0094	0.0091	0.0076	0.0097	0.0039
non-dv	cue	61	0.0003	0.001	0.0022	0.0025	0.0025	0.0014	0.0029	0.0025	0.0043	0.0046	0.0119	0.0158	0.0218	0.0248	0.0222	0.0236	0.0152	0.0121	0.0112	0.0142	0.0136	0.013	0.015	0.0146	0.0121	0.0142	0.0194	0.0184	0.0153	0.0139	0.0142	0.0145	0.0118	0.0091	0.0055	0.0043	0.0113	0.0127	0.0108	0.0101	0.0089	0.0086	0.0069	0.0063	0.0054	0.0025	0.0016
non-dv	cue	62	0.0004	0.0007	0.0037	0.0049	0.0062	0.0069	0.0075	0.0078	0.01	0.0142	0.0142	0.0237	0.0256	0.0274	0.0384	0.0363	0.0325	0.0313	0.0291	0.025	0.024	0.0379	0.0417	0.0391	0.0391	0.0414	0.0404	0.0413	0.0335	0.0226	0.0151	0.0152	0.0146	0.0124	0.0124	0.0141	0.0135	0.0144	0.0142	0.0075	0.011	0.0112	0.0034	0.0034	0.0039	0.0049	0.0031
non-dv	cue	63	0.0012	0.0001	0.0001	0.0001	0.0029	0.0038	0.0025	0.0025	0.0023	0.0023	0.0023	0.0016	0.0009	0.0015	0.0008	0.0002	0.0002	0.0002	0	0	0.0009	0.0007	0.0007	0.0007	0.0004	0.0002	0.0002	0.0002	0.0026	0.0026	0.0026	0.0026	0.0026	0.0019	0.0019	0.0019	0.0033	0.0023	0.0023	0.0023	0.0023	0.0018	0.0023	0.0023	0.0033	0.0033	0.0033
non-dv	cue	64	0.0275	0.0237	0.0248	0.0318	0.0278	0.0305	0.0249	0.0259	0.0233	0.0201	0.0194	0.0185	0.0183	0.016	0.0113	0.01	0.0108	0.01	0.0098	0.0103	0.01	0.0107	0.0112	0.0078	0.0085	0.0074	0.011	0.0069	0.0045	0.0049	0.0032	0.0018	0.0027	0.0025	0.0028	0.0017	0.0007	0.0006	0.0008	0.0001	0	0	0	0.0003	0.0001	0	0
non-dv	cue	65	0.0365	0.0312	0.0362	0.0412	0.0413	0.0423	0.0388	0.0324	0.0294	0.0316	0.0249	0.0276	0.0272	0.0283	0.0268	0.0192	0.0093	0.0056	0.0082	0.0079	0.0062	0.0047	0.0031	0.0021	0.0013	0.0006	0.0002	0.0017	0.0014	0.0003	0.0013	0.0001	0.0005	0.0002	0	0	0	0.0016	0.0014	0.002	0.0003	0.0001	0	0	0.0005	0.0004	0.0024
non-dv	cue	66	0.0001	0	0	0.0001	0.0004	0.0006	0.0002	0.0003	0.0003	0.0003	0	0.001	0.0015	0.0011	0.0003	0.0002	0.0002	0.0001	0.0021	0.0005	0.0001	0.0002	0.0002	0.0001	0	0.0001	0.0004	0.0002	0.005	0.0047	0.0039	0.0034	0.0013	0.0017	0.0038	0.0108	0.0064	0.0079	0.0084	0.0091	0.0101	0.0069	0.0074	0.002	0.0013	0.002	0.0011
non-dv	cue	67	0.0001	0	0.0001	0.0006	0.0005	0	0.0001	0.0001	0.0002	0.0001	0.0009	0.0026	0.0043	0.0067	0.0035	0.0024	0.0017	0.0014	0.0012	0.0003	0.0003	0.0002	0	0.0007	0.0012	0.0008	0.0014	0.0002	0.0006	0.0009	0.0035	0.0027	0.0024	0.0041	0.0006	0.0004	0.0006	0.0038	0.0039	0.002	0.0009	0.0013	0.0005	0.0008	0.0009	0.0007	0.0005
non-dv	cue	68	0.0004	0.0006	0.0002	0.0022	0.0011	0.0022	0.0016	0.0016	0	0.0001	0.0048	0.0048	0.0143	0.0048	0.0033	0.0033	0.0022	0.0022	0.0022	0.0009	0.0009	0.0044	0.0023	0.0023	0.0022	0.0053	0.0053	0.0036	0.0025	0.0004	0.0017	0.0017	0.0103	0.0103	0.0087	0.0087	0.0082	0.0071	0.0071	0.0055	0.0041	0.0035	0.0001	0.0001	0.0001	0.0009	0.0009
non-dv	cue	69	0.0003	0.0006	0.0008	0.002	0.0031	0.0006	0.0037	0.0087	0.012	0.01	0.0049	0.0052	0.0045	0.0058	0.0031	0.0052	0.0018	0.0041	0.0036	0.0004	0.0001	0	0	0.0007	0.0032	0.0007	0.001	0.0021	0.0048	0.0034	0.0021	0.0044	0.0032	0.0061	0.0055	0.0063	0.004	0.0068	0.0069	0.0008	0.0004	0.0012	0.0009	0.0012	0	0.0007	0.0026
non-dv	cue	70	0.0049	0.0061	0.0118	0.0075	0.0087	0.0089	0.0084	0.0072	0.0078	0.005	0.0002	0	0	0.0001	0.0001	0.0002	0.0002	0.0004	0.0001	0.0001	0	0	0.0001	0.0001	0	0	0	0.0004	0.0002	0.0002	0.0004	0.0007	0.0011	0.0012	0.0021	0.0037	0.0076	0.0076	0.0045	0.0043	0.0049	0.0034	0.002	0.0026	0.0033	0.0026	0.0032
non-dv	cue	71	0.0001	0.0005	0.0007	0.0019	0	0.0002	0.0004	0.0004	0.0007	0.0018	0.0047	0.0053	0.0042	0.0065	0.0055	0.0045	0.005	0.0069	0.0093	0.0111	0.013	0.0053	0.0026	0.0033	0.005	0.0044	0.0044	0.0041	0.0022	0.0013	0.001	0.0005	0.0029	0.0015	0.0016	0.0014	0.0008	0.0003	0.0001	0.0007	0.0016	0.0012	0.0019	0.0033	0.0055	0.0055	0.0082
non-dv	cue	72	0.0144	0.0156	0.0195	0.0246	0.0198	0.0209	0.0249	0.0253	0.0227	0.0319	0.0291	0.0301	0.0457	0.0552	0.0538	0.0508	0.0427	0.0402	0.0516	0.0498	0.0519	0.0518	0.0643	0.0623	0.0675	0.0619	0.0659	0.0675	0.0762	0.0652	0.0586	0.0568	0.0427	0.0339	0.0423	0.0513	0.0516	0.0376	0.0365	0.0373	0.0363	0.0379	0.0271	0.0324	0.0347	0.0449	0.043
non-dv	cue	73	0.0042	0.0053	0.0065	0.0042	0.0043	0.0056	0.0057	0.0031	0.0059	0.0046	0.0034	0.0087	0.0076	0.0049	0.0069	0.0043	0.0051	0.0017	0.0018	0.0011	0.0013	0.001	0.001	0.0008	0.001	0.0014	0.0026	0.0033	0.0027	0.0049	0.0041	0.0024	0.0045	0.007	0.0107	0.0118	0.0104	0.0077	0.0053	0.0057	0.0059	0.0055	0.0045	0.005	0.0061	0.0062	0.0065
dv	cue	1	0.0049	0.0099	0.0213	0.0213	0.0107	0.0058	0.004	0.008	0.0002	0.0012	0.0012	0.0044	0.0045	0.0111	0.0156	0.0323	0.0182	0.0046	0.0114	0.0111	0.0023	0.0005	0.0005	0.001	0.0007	0.002	0.0034	0.0027	0.0014	0.0021	0.0048	0.0194	0.0185	0.0175	0.0304	0.0488	0.0404	0.0391	0.0605	0.0539	0.0382	0.027	0.028	0.0397	0.0224	0.0162	0.0161
dv	cue	2	0.0001	0.0005	0.0001	0	0.0008	0.0014	0.0057	0.003	0.0019	0.0027	0.0037	0.0037	0.0017	0.0005	0.0002	0.0001	0	0.0013	0.0002	0.0016	0.0005	0.0023	0	0	0.0002	0.002	0.0005	0.0071	0.0055	0.0044	0.0046	0.0016	0.0051	0.0053	0.0045	0.0029	0.0018	0.0005	0.0001	0.0002	0.0001	0.0001	0	0.0005	0	0.002	0.006
dv	cue	3	0.0078	0.0097	0.0136	0.0039	0.003	0.0005	0.0031	0.0014	0.0049	0.0094	0.0048	0.0023	0.0052	0.0013	0.0023	0.0031	0.004	0.0009	0.0011	0.0029	0.0077	0.0063	0.0034	0.0097	0.0165	0.02	0.0143	0.0201	0.0173	0.0136	0.013	0.0106	0.0118	0.018	0.0184	0.0178	0.0131	0.0142	0.0175	0.0116	0.0054	0.0036	0.0056	0.0034	0.0001	0.001	0
dv	cue	4	0.0017	0.0017	0.003	0.001	0.002	0.002	0.0027	0.0027	0.0045	0.004	0.0066	0.0009	0.0012	0.0049	0.0048	0.0048	0.0048	0	0.0002	0.0002	0.0002	0.0005	0.0012	0	0.0003	0.0031	0.0052	0.0052	0.0018	0.0001	0.0001	0.0001	0.0014	0.0044	0.0016	0.0029	0.0029	0.0009	0.0024	0.0015	0.0005	0.0026	0.0003	0.0007	0	0	0
dv	cue	5	0.0128	0.007	0.0035	0.0057	0.0056	0.0097	0.0075	0.0068	0.0007	0.0021	0.0018	0.0016	0.0028	0.0006	0.0005	0.0005	0	0.0013	0.0018	0.0004	0	0	0.0001	0.0003	0.0001	0.0003	0.0001	0.0002	0.0047	0.0027	0.0011	0.0044	0.0048	0.0084	0.0075	0.0091	0.0132	0.0071	0.0063	0.0053	0.0025	0.0023	0.0039	0.0014	0.0018	0.0037	0.0034
dv	cue	6	0	0	0	0.0007	0.0003	0	0.0003	0.0006	0.0011	0.0001	0	0	0	0	0.0005	0.0007	0	0.0002	0	0.0002	0.0001	0.0013	0.0014	0.0048	0.0059	0.0051	0.007	0.0053	0.0071	0.0073	0.0103	0.007	0.0077	0.0062	0.0069	0.014	0.0142	0.0139	0.0165	0.0175	0.0291	0.0221	0.0258	0.0194	0.0088	0.0059	0.0051
dv	cue	7	0.0002	0.0002	0.0002	0.0017	0.0018	0.0019	0.0022	0.0005	0.0008	0.0022	0.0025	0.0026	0.0049	0.0039	0.0026	0.0058	0.0038	0.0027	0.0018	0.0013	0.0002	0.0001	0.0005	0.0001	0.0005	0.0009	0.0005	0	0	0.0009	0	0.0001	0.0005	0.0023	0.0047	0.0084	0.0088	0.0164	0.0086	0.0055	0.006	0.0049	0.0067	0.0074	0.0025	0.0005	0.0015
dv	cue	8	0.0032	0.0011	0.0013	0.0173	0.0268	0.0371	0.023	0.023	0.0098	0.0059	0.0062	0.004	0.0123	0.024	0.0207	0.0133	0.0188	0.024	0.017	0.02	0.0193	0.0355	0.027	0.0125	0.0046	0.0007	0.0041	0.0133	0.0174	0.0221	0.0162	0.0125	0.0053	0.0088	0.016	0.0223	0.0138	0.0095	0.0125	0.0171	0.0169	0.0086	0.0119	0.0119	0.0256	0.0376	0.0294
dv	cue	9	0.0027	0.0021	0.0105	0.0099	0.0049	0.0007	0.0019	0.0003	0.0044	0.004	0.0013	0.003	0.0008	0.0009	0	0.0001	0.0001	0.0008	0.0015	0.0004	0.0014	0.004	0.0014	0.0014	0.0014	0.0034	0.002	0.001	0.0006	0.0005	0.0001	0	0.0018	0.0011	0.0004	0.0002	0	0.0001	0.0007	0.0004	0.0014	0.0018	0.0008	0.0002	0.0002	0.0003	0.0001
dv	cue	10	0.0072	0.0072	0.0072	0.0072	0.0072	0.0072	0.0072	0.0072	0.0072	0.0072	0.0072	0.0072	0.0072	0.0072	0.007	0.007	0.0011	0.0011	0.0011	0.0011	0.0011	0.0011	0.0011	0.0011	0.0011	0.0011	0.0011	0.0011	0.0011	0.0011	0.0011	0.0011	0.0011	0.0011	0	0	0	0	0	0	0	0	0	0	0	0	0
dv	cue	11	0.0004	0.0004	0.0008	0.0008	0.0006	0.0038	0.0032	0.0023	0.0008	0.0006	0	0.0005	0.0023	0.0034	0.0058	0.0058	0.0078	0.0088	0.0048	0.0019	0.0033	0.0045	0.0072	0.0058	0.0014	0.0051	0.0075	0.0095	0.0073	0.0073	0.0063	0.0047	0.0038	0.0013	0.0005	0.0011	0.0005	0.0003	0.0023	0.0033	0.0023	0.0011	0.0034	0.0056	0.0067	0.0084	0.0086
dv	cue	12	0.0077	0.0078	0.01	0.0133	0.0197	0.0191	0.0173	0.0181	0.0157	0.0136	0.0182	0.0198	0.0149	0.0157	0.019	0.0133	0.0115	0.0129	0.0049	0.0069	0.0065	0.0034	0.0017	0.0017	0.0024	0.002	0.0033	0.0013	0.0016	0.0008	0.0004	0.0007	0.0014	0.0005	0.0003	0	0.0002	0.0001	0.0015	0.0018	0.0011	0.0011	0.0009	0.0018	0.0005	0.0006	0
dv	cue	13	0.0048	0.0057	0.0057	0.0074	0.0076	0.0091	0.01	0.0083	0.011	0.0083	0.0138	0.0136	0.0161	0.0178	0.0232	0.022	0.0207	0.0207	0.0214	0.0222	0.0216	0.0193	0.0145	0.0157	0.0169	0.0139	0.0048	0.0041	0.0021	0.0019	0.0006	0.0015	0.0001	0.0001	0.0015	0.002	0.0036	0.0046	0.009	0.0163	0.0206	0.0218	0.0197	0.019	0.0229	0.0203	0.0182
dv	cue	14	0.0202	0.0128	0.0125	0.0122	0.0144	0.0143	0.0122	0.0122	0.0096	0.0099	0.0104	0.0158	0.0138	0.0089	0.0089	0.0088	0.0085	0.0077	0.0106	0.0106	0.0106	0.0154	0.0165	0.015	0.0157	0.0136	0.009	0.0094	0.0106	0.0117	0.0099	0.0053	0.0053	0.0094	0.0102	0.0102	0.0087	0.0087	0.0087	0.0084	0.0105	0.0101	0.0078	0.0064	0.0071	0.0071	0.0148
dv	cue	15	0.0011	0.003	0.0032	0.0055	0.0055	0.0022	0.0027	0.0028	0.0034	0.0031	0.0019	0.0005	0.0002	0.0012	0.0012	0.0002	0.0014	0.0021	0.0034	0.0003	0.0003	0.0001	0.0004	0.0004	0.0003	0.0017	0.002	0.0016	0.003	0.0032	0.0017	0.0051	0.0037	0.0004	0.0011	0	0.0004	0	0	0	0.0002	0	0.0004	0.0005	0.0013	0.0013	0.0083
dv	cue	16	0.0056	0.0008	0	0	0	0.0002	0.0002	0.0002	0.0002	0.0003	0.0001	0	0.001	0.0011	0.0001	0.0001	0.0012	0.0009	0.0008	0.0011	0.0011	0.0067	0.0049	0.0054	0.0044	0.0055	0.0072	0.0034	0.0035	0.003	0.0028	0.0023	0.002	0.0009	0.0006	0.0013	0.0011	0.0013	0.0013	0.0008	0.0002	0	0	0	0.0001	0	0.0001
dv	cue	17	0.005	0.0056	0.0007	0.0006	0.0015	0.0015	0.0005	0.0001	0.0002	0.0016	0.0042	0.0053	0.0051	0.0062	0.0049	0.0092	0.0094	0.0065	0.0061	0.0099	0.0093	0.0089	0.0081	0.0092	0.0163	0.0187	0.0163	0.0149	0.0133	0.0111	0.0063	0.0044	0.0046	0.0028	0.0066	0.0029	0.0009	0.002	0.0016	0.0003	0.0012	0.0025	0.0025	0.0021	0.0026	0.0019	0.0017
dv	cue	18	0.0054	0.0035	0.0041	0.0047	0.0021	0.0019	0.0027	0.0011	0.0029	0.002	0.0015	0.0012	0.001	0.0008	0.0002	0	0.0016	0.001	0.0003	0	0.0002	0.001	0.0003	0	0.0002	0.0003	0	0.0003	0.0002	0.0001	0	0.0002	0.0003	0.001	0.001	0.0008	0.0019	0.0002	0.0001	0.0005	0.0002	0	0.0008	0.0039	0.0005	0.0003	0.002
dv	cue	19	0.0051	0.0065	0.0051	0.0037	0.0066	0.0077	0.0078	0.0098	0.0127	0.0118	0.0066	0.0062	0.01	0.013	0.0164	0.0231	0.0248	0.026	0.0245	0.0221	0.0171	0.0196	0.023	0.0233	0.0192	0.0097	0.0081	0.0052	0.0021	0.0038	0.0038	0.0039	0.0004	0.0005	0.0007	0.0005	0.0002	0.0001	0.0001	0.0001	0	0.0001	0.0002	0.0006	0	0	0
dv	cue	20	0.0069	0.0068	0.0014	0.0046	0.0037	0.0059	0.007	0.0106	0.0021	0.0005	0.0007	0.0001	0.0008	0.0019	0.0025	0.0037	0.0058	0.0072	0.0081	0.0161	0.0158	0.0207	0.0123	0.0121	0.0081	0.0083	0.005	0.0052	0.0022	0.0026	0.0044	0.0055	0.0012	0.0009	0.0001	0.0003	0.0023	0.0048	0.0025	0.0025	0.0016	0.0004	0.0001	0	0.0002	0.0001	0.0006
dv	cue	21	0.005	0.0003	0.0006	0.0003	0.0008	0.0002	0	0.0005	0.0023	0.0018	0.0063	0.0108	0.0049	0.0105	0.0059	0.0068	0.0077	0.006	0.008	0.0035	0.0055	0.0005	0.0001	0	0.0022	0.0029	0.0031	0.0055	0.0116	0.01	0.0064	0.0078	0.006	0.0101	0.0033	0.0053	0.0064	0.0043	0.0044	0.0043	0.0037	0.0051	0.0058	0.007	0.0046	0.0013	0.0018
dv	cue	22	0.0001	0.0002	0.0003	0.0001	0.0001	0	0.0001	0.0001	0.0002	0.0004	0.0004	0.0003	0.0003	0.0002	0.0001	0.0006	0.0056	0.0066	0.0048	0.0038	0.0041	0.0102	0.0102	0.011	0.0148	0.0149	0.0131	0.0151	0.0158	0.0143	0.0194	0.0222	0.0237	0.0237	0.026	0.0256	0.0239	0.0224	0.0264	0.0285	0.0319	0.0286	0.0267	0.025	0.0254	0.0277	0.0345
dv	cue	23	0.0059	0.0057	0.0064	0.0087	0.0101	0.0109	0.009	0.0084	0.0048	0.0095	0.0116	0.0093	0.0089	0.0059	0.0048	0.0079	0.0094	0.0213	0.022	0.0228	0.0181	0.0166	0.0141	0.0137	0.0137	0.0125	0.0127	0.0075	0.0084	0.0095	0.0121	0.0117	0.013	0.012	0.0112	0.0069	0.007	0.0081	0.0077	0.0053	0.0072	0.0091	0.0105	0.0103	0.0114	0.0102	0.0042
dv	cue	24	0.012	0.0169	0.0111	0.0151	0.0135	0.0065	0.0079	0.0091	0.0129	0.0152	0.0184	0.0214	0.025	0.0232	0.0178	0.0178	0.0205	0.0251	0.0331	0.0317	0.028	0.031	0.0353	0.0299	0.0349	0.039	0.0408	0.0331	0.0285	0.0285	0.0234	0.0194	0.0212	0.0234	0.0211	0.0171	0.0122	0.0059	0.0003	0.0002	0.0004	0.0026	0.0035	0.0032	0.0035	0.0033	0.0041
dv	cue	25	0.0015	0.0012	0.0016	0.0002	0	0	0.0014	0.0002	0	0	0.0001	0	0.0012	0.0031	0.0004	0.0004	0.0013	0.0016	0.0004	0.001	0.0028	0.0033	0.001	0.0022	0.0043	0.0038	0.0026	0.005	0.0035	0.0012	0.0043	0.0023	0.0057	0.0039	0.0029	0.0017	0.0018	0.0035	0.0069	0.0039	0	0.0001	0.0002	0.0001	0.0001	0	0.001
dv	cue	26	0.0107	0.0083	0.0079	0.0088	0.0061	0.004	0.007	0.0061	0.0055	0.0056	0.0047	0.004	0.0049	0.0029	0.0031	0.004	0.0055	0.0043	0.0036	0.0006	0.0006	0.0021	0.0009	0.0008	0.0013	0.0031	0.0003	0.0002	0.0002	0	0.0002	0.0001	0.0002	0	0.0003	0.0017	0.0004	0.001	0.0001	0.0016	0.0023	0.0014	0.0007	0.0015	0.0001	0	0.0006
dv	cue	27	0.0003	0	0.0004	0	0.0008	0.0008	0.0005	0.0026	0.0024	0.001	0.0006	0.003	0.0031	0.0038	0.004	0.0029	0.0023	0.003	0.0031	0.0017	0.0023	0.003	0.0063	0.0063	0.0065	0.0071	0.007	0.0079	0.0087	0.0147	0.0147	0.0091	0.0085	0.008	0.0083	0.0097	0.0102	0.0103	0.0049	0.0088	0.0083	0.0091	0.0085	0.0085	0.0068	0.0053	0.0053
[truncated: 154 more columns]

## Sheet: B_release sort
condition	event	cell	-1500	-1490	-1480	-1470	-1460	-1450	-1440	-1430	-1420	-1410	-1400	-1390	-1380	-1370	-1360	-1350	-1340	-1330	-1320	-1310	-1300	-1290	-1280	-1270	-1260	-1250	-1240	-1230	-1220	-1210	-1200	-1190	-1180	-1170	-1160	-1150	-1140	-1130	-1120	-1110	-1100	-1090	-1080	-1070	-1060	-1050	-1040
non-dv	release	1	0.0183	0.011	0.0165	0.014	0.0096	0.0049	0.0054	0.0089	0.0061	0.0273	0.023	0.0295	0.028	0.0176	0.0123	0.015	0.0181	0.0133	0.0247	0.0244	0.0233	0.0206	0.0171	0.0104	0.0128	0.0168	0.0144	0.0301	0.0422	0.012	0.0089	0.0069	0.003	0.0034	0.0056	0.0001	0	0.001	0.0039	0.0031	0.0096	0.0025	0.0032	0.0002	0.0005	0.0009	0.0001
non-dv	release	2	0.0134	0.0061	0.0042	0.0008	0.0011	0.0004	0	0.0009	0.0037	0.0049	0.0036	0.0018	0.0052	0.0103	0.0169	0.0126	0.0161	0.0144	0.0173	0.0207	0.0183	0.0078	0.006	0.002	0.001	0.0021	0.0007	0.0002	0.0016	0.0001	0	0.0002	0.001	0	0	0	0	0.0005	0.0011	0.0024	0.0002	0	0	0.0007	0.0003	0.0002	0.0004
non-dv	release	3	0.0287	0.0349	0.029	0.0269	0.0256	0.0293	0.0296	0.0277	0.0303	0.0477	0.0389	0.0385	0.0326	0.0301	0.0206	0.0177	0.0161	0.0131	0.0186	0.0231	0.0194	0.0228	0.0327	0.0259	0.0361	0.028	0.0258	0.025	0.0284	0.0171	0.0144	0.0125	0.0124	0.0087	0.0081	0.0132	0.0109	0.0092	0.0086	0.0045	0.0022	0.0008	0.0004	0.002	0.0002	0	0.0004
non-dv	release	4	0.0204	0.0119	0.0116	0.0108	0.005	0.0024	0.002	0.002	0.0007	0.0007	0	0	0.0001	0.0001	0	0	0.0001	0.0001	0.0001	0.0001	0	0.0001	0.0001	0.0002	0.002	0.0018	0.0031	0.0031	0.0089	0.0108	0.0102	0.0082	0.0139	0.0196	0.021	0.025	0.0232	0.0206	0.0234	0.0211	0.0177	0.0213	0.0215	0.0215	0.0236	0.0236	0.024
non-dv	release	5	0.0014	0.0018	0.0072	0.0098	0.0117	0.0141	0.0152	0.01	0.0091	0.004	0.0018	0.003	0.0039	0.0042	0.0047	0.0006	0.0017	0.0024	0.0034	0.0027	0.0007	0.001	0.0001	0.0015	0.0017	0.0039	0.0019	0.0004	0.001	0.0015	0.0015	0.0027	0.0044	0.0018	0.0053	0.0007	0.0013	0.0021	0.0031	0.0046	0.0041	0.005	0.0068	0.0031	0.0036	0.001	0.0033
non-dv	release	6	0.0035	0.0022	0.0004	0.0004	0.0001	0	0.0019	0.0004	0.0028	0.0003	0.0008	0.0001	0.0006	0.0001	0.0018	0.0015	0.0014	0.0012	0.0017	0.0025	0.0049	0.0032	0.0015	0.002	0.0015	0.0015	0.0017	0.0007	0.0009	0.0002	0.0004	0.0003	0.0012	0.001	0.0051	0.0061	0.0072	0.0063	0.0044	0.0041	0.0066	0.0043	0.0038	0.0064	0.0052	0.0061	0.0036
non-dv	release	7	0.0013	0.0001	0.0001	0	0	0	0.0002	0.0004	0	0	0	0.0001	0.0002	0.0007	0.0007	0.001	0.001	0.0002	0.0001	0	0	0.0003	0.0015	0.0009	0.0006	0.001	0.0018	0.0012	0.0048	0.0055	0.0047	0.0041	0.0049	0.0078	0.0101	0.0076	0.0087	0.0035	0.006	0.0062	0.006	0.0058	0.006	0.0042	0.0042	0.0032	0.0027
non-dv	release	8	0.006	0.0021	0.0016	0.0011	0.0027	0.0026	0.003	0.0003	0.0008	0.0013	0.0028	0.0042	0.0032	0.0108	0.0135	0.016	0.0216	0.0249	0.0322	0.0226	0.0262	0.0311	0.0423	0.0527	0.0471	0.0438	0.0392	0.0547	0.0591	0.0588	0.0603	0.0678	0.0663	0.0623	0.0408	0.0263	0.0152	0.0028	0.0019	0.0018	0.0078	0.0167	0.0099	0.0056	0.0098	0.0158	0.0132
non-dv	release	9	0.0432	0.0461	0.0345	0.0674	0.0643	0.0499	0.0372	0.0342	0.0247	0.0327	0.0385	0.0434	0.0602	0.0499	0.0465	0.0475	0.0639	0.058	0.0352	0.03	0.0388	0.0386	0.0498	0.0317	0.027	0.0511	0.0448	0.0468	0.0339	0.0204	0.0105	0.007	0.0004	0.0002	0	0.0005	0.0033	0.0057	0.0036	0.0038	0.0082	0.0085	0.015	0.0129	0.0123	0.015	0.0139
non-dv	release	10	0.0012	0.002	0.0003	0.0017	0.0026	0.0042	0.0028	0.0025	0.0001	0.0001	0.0001	0.0001	0.0006	0.0002	0.002	0.0059	0.0026	0.0049	0.0044	0.008	0.0041	0.0048	0.0047	0.0109	0.0112	0.0145	0.0151	0.018	0.0086	0.0083	0.0066	0.0122	0.0134	0.0115	0.0088	0.0071	0.0131	0.0076	0.0103	0.0076	0.0046	0.0033	0.0014	0.001	0.0007	0.0002	0
non-dv	release	11	0.017	0.0177	0.0163	0.0205	0.0133	0.0092	0.0117	0.011	0.0025	0.0025	0.0004	0.0014	0.0038	0.0002	0.0007	0.0007	0.0008	0.0001	0.0041	0.0036	0.0023	0.0002	0.0014	0.0006	0.0002	0.0006	0.0024	0.0024	0.0036	0.0034	0.0047	0.012	0.0155	0.0138	0.0211	0.0278	0.0411	0.0421	0.0359	0.0376	0.0453	0.0453	0.0563	0.0477	0.045	0.0568	0.0559
non-dv	release	12	0.0119	0.0142	0.0209	0.0216	0.0183	0.0203	0.0378	0.0437	0.0358	0.0358	0.0347	0.028	0.0227	0.0161	0.013	0.0167	0.0114	0.0122	0.0084	0.0042	0.0015	0.003	0.0001	0.0001	0.0032	0.0001	0.0001	0.0011	0.0011	0.0006	0.0002	0.0015	0.0015	0.0025	0.0052	0.0013	0.0003	0	0	0.0002	0.0001	0	0.0003	0	0.0029	0.0028	0.0049
non-dv	release	13	0.0032	0.001	0.0005	0.0005	0.0028	0.0013	0.0009	0	0.0001	0	0.0002	0.0012	0.0007	0.0003	0.001	0.0017	0.0007	0	0.0028	0.0018	0.0021	0.0033	0.006	0.0035	0.0141	0.0053	0.0012	0.0005	0.0026	0.0007	0.0031	0.0139	0.0079	0.0039	0.0013	0.0018	0.0003	0.0002	0.0007	0.0005	0	0.0003	0.001	0.0003	0.0013	0.0003	0.0028
non-dv	release	14	0.0122	0.0192	0.0144	0.0166	0.0144	0.0178	0.0231	0.024	0.0147	0.0108	0.0057	0.0068	0.0108	0.0161	0.0166	0.0159	0.0179	0.0181	0.0147	0.0144	0.0144	0.0086	0.0105	0.009	0.0087	0.0092	0.0043	0.0066	0.005	0.0058	0.0037	0.0023	0.0014	0	0.0003	0.0006	0.0001	0.0013	0.0012	0	0.0002	0.0012	0.0009	0.0002	0.0008	0	0.0031
non-dv	release	15	0.0115	0.0116	0.0161	0.0111	0.0123	0.0195	0.0217	0.0378	0.0392	0.0268	0.0154	0.0128	0.0146	0.0112	0.0066	0.0014	0.0005	0.0027	0.0034	0.0036	0.0031	0.0027	0.0043	0.0057	0.0051	0.001	0	0.0006	0.001	0.0001	0.0002	0.0001	0.0002	0.0003	0.0013	0.0011	0.0015	0.0018	0.0022	0.0024	0.008	0.0178	0.0221	0.0318	0.0477	0.0588	0.0626
non-dv	release	16	0.0128	0.0128	0.0131	0.0127	0.0099	0.0099	0.0094	0.0058	0.0066	0.0067	0.0074	0.009	0.0121	0.0134	0.0185	0.0185	0.0112	0.0112	0.0112	0.0112	0.0112	0.0116	0.0151	0.014	0.0158	0.016	0.0169	0.013	0.0149	0.017	0.013	0.0074	0.0058	0.0034	0.0005	0.0001	0.0004	0.0004	0.0012	0.0001	0.0003	0.0021	0.0046	0.0032	0.0029	0.0035	0.0085
non-dv	release	17	0	0.0006	0.005	0.0041	0.005	0.002	0.0031	0.0025	0.001	0.0002	0.0007	0.0008	0	0	0	0	0.0005	0.0003	0	0.0003	0.0003	0.0003	0.0016	0.0012	0.0001	0.0012	0.002	0.0004	0.0011	0.0011	0	0.0001	0	0	0.0011	0.0006	0	0	0.0001	0	0.0012	0.0002	0.0001	0.0008	0.004	0.0051	0.0046
non-dv	release	18	0.0172	0.0139	0.0139	0.0093	0.0063	0.0049	0.0071	0.0035	0.0058	0.0034	0.004	0.005	0.0019	0.003	0.001	0.0003	0.0024	0.0063	0.0099	0.0045	0.0089	0.0121	0.0115	0.011	0.0141	0.0212	0.0144	0.0182	0.0127	0.0072	0.0031	0.0031	0.0031	0.0031	0.0009	0.004	0.0003	0.0003	0.0006	0.0006	0.0066	0.0064	0.0062	0.0002	0	0.0034	0.0053
non-dv	release	19	0.0106	0.0154	0.0084	0.0094	0.0033	0.0077	0.0056	0.0065	0.0085	0.0066	0.0021	0.0012	0.0009	0.0005	0.0003	0.002	0.0026	0.0007	0.0012	0.0047	0.0023	0.0027	0.0001	0.0002	0	0.0001	0.0005	0.0003	0.0008	0.0002	0.0003	0.0005	0.0001	0.0021	0.0006	0.0003	0.0022	0.0109	0.0081	0.0061	0.0038	0.0045	0.0068	0.0078	0.0066	0.0118	0.0163
non-dv	release	20	0.0075	0.0073	0.0072	0.0059	0.0059	0.0051	0.0057	0.0052	0.0046	0.0052	0.0065	0.0068	0.006	0.0058	0.0028	0.0053	0.0081	0.0096	0.0093	0.0079	0.0109	0.0079	0.0073	0.0101	0.0089	0.0096	0.0052	0.0071	0.007	0.0064	0.0075	0.0052	0.0067	0.0037	0.0083	0.0083	0.005	0.0029	0.0034	0.0053	0.0053	0.0077	0.0106	0.0072	0.0064	0.0048	0.0097
non-dv	release	21	0.002	0.001	0.001	0.001	0.001	0.001	0.001	0.0002	0	0.008	0.008	0.008	0.008	0.008	0.008	0.008	0.008	0.008	0.0092	0.0056	0.0056	0.0041	0.0041	0.0041	0.0041	0.0041	0.0083	0.0071	0.0059	0.0048	0.0048	0.0048	0.0099	0.015	0.0139	0.0267	0.0247	0.0222	0.0209	0.0209	0.0209	0.0233	0.0233	0.0233	0.0247	0.028	0.0238
non-dv	release	22	0.0072	0.0094	0.0093	0.0122	0.0148	0.0096	0.0136	0.0092	0.0093	0.0094	0.0074	0.0084	0.0063	0.0123	0.0111	0.011	0.0143	0.0158	0.0189	0.0169	0.0172	0.0113	0.0096	0.0066	0.0079	0.0077	0.0086	0.0115	0.0083	0.0069	0.0067	0.0044	0.0071	0.0018	0.0023	0.0031	0.0026	0.0021	0.0005	0.0017	0.0033	0.0046	0.006	0.0083	0.0111	0.0135	0.0145
non-dv	release	23	0.0033	0.0091	0.0165	0.017	0.0151	0.0259	0.0229	0.0145	0.0212	0.0138	0.0127	0.0212	0.016	0.0116	0.0049	0.0103	0.0073	0.0147	0.0143	0.0178	0.0108	0.0093	0.0072	0.0097	0.0085	0.0004	0.0016	0.0019	0.0019	0.0051	0.0014	0.0023	0.0026	0.0047	0.0035	0.0058	0.0051	0.0012	0.0012	0.0043	0.0043	0.0037	0.0037	0.0117	0.0106	0.0037	0.0101
non-dv	release	24	0.0016	0.0007	0.0001	0.0004	0.0009	0.0002	0	0.0015	0.0032	0.0038	0.0078	0.0064	0.0081	0.0052	0.0126	0.0099	0.0093	0.014	0.0143	0.0108	0.011	0.0083	0.0077	0.0118	0.0182	0.0134	0.0106	0.0069	0.0047	0.0022	0.0012	0.0014	0.0011	0.0018	0.0001	0.0005	0.0001	0.0008	0.0001	0	0	0.0001	0.0004	0	0.0051	0.0051	0.016
non-dv	release	25	0.0239	0.0248	0.0101	0.0206	0.0225	0.0226	0.0226	0.0317	0.038	0.0327	0.0275	0.0143	0.0119	0.0025	0.01	0.001	0.0002	0	0.0004	0.0004	0.0002	0	0.0025	0.0008	0.0004	0.0001	0.0011	0.0031	0.0015	0.0026	0.0031	0.0022	0.0006	0.0009	0.0038	0.0005	0.0017	0.0001	0.0012	0.0018	0.0032	0.0004	0.0003	0.0004	0.0006	0.0004	0
non-dv	release	26	0.0061	0.0082	0.0081	0.0087	0.0087	0.0052	0.0044	0.005	0.0061	0.0045	0.0049	0.0039	0.0038	0.003	0.0033	0.0032	0.002	0.0016	0.0012	0.0013	0.0006	0.001	0.0009	0.0009	0.0009	0.0021	0.0027	0.0021	0.0017	0.003	0.002	0.0033	0.0038	0.0042	0.0034	0.0027	0.0031	0.004	0.004	0.0019	0.0053	0.0033	0.0007	0.0002	0.0007	0.0007	0.0019
non-dv	release	27	0.0299	0.0351	0.0295	0.0357	0.0262	0.0238	0.023	0.0211	0.0167	0.0158	0.0147	0.0222	0.0142	0.024	0.0134	0.0174	0.0093	0.0074	0.0042	0.0077	0.004	0.0062	0.0057	0.0051	0.0061	0.0063	0.0073	0.0073	0.0073	0.0067	0.0126	0.0126	0.0176	0.0114	0.0146	0.0122	0.011	0.0098	0.0066	0.0025	0.0025	0.0006	0.0001	0.0008	0.0011	0.0011	0.001
non-dv	release	28	0.009	0.014	0.0091	0.0104	0.0073	0.0092	0.0066	0.0066	0.006	0.0067	0.007	0.0073	0.0038	0.0031	0.001	0.0005	0.0005	0.0004	0	0.0006	0.002	0.0017	0.0029	0.0012	0.0019	0.0012	0.0047	0.0044	0.0042	0.0029	0.0035	0.0056	0.0082	0.0161	0.0118	0.0144	0.0105	0.0116	0.0118	0.0075	0.004	0.0003	0.0007	0.0026	0.0085	0.005	0.0011
non-dv	release	29	0.0065	0.0024	0.002	0.0018	0.0036	0.0005	0.0005	0.0002	0.0016	0.0003	0	0.0007	0.0007	0.0019	0.0019	0.0002	0.0001	0.0001	0.0001	0	0	0.0005	0.0012	0.0002	0.0017	0.0005	0.0005	0	0	0	0.0005	0.0004	0.0048	0.0043	0.0029	0.0001	0.0003	0	0	0	0.0002	0	0.0004	0	0.0001	0.0001	0
non-dv	release	30	0.0041	0.0027	0.0012	0.0033	0.003	0.0026	0.002	0.0027	0.0023	0.0023	0.0024	0.0016	0.0016	0.0003	0.0001	0	0.0002	0.0003	0.0003	0.0001	0.0002	0	0	0.0001	0.0001	0	0	0.0001	0.0003	0.0001	0	0	0	0	0.0004	0.0002	0.0001	0	0	0	0	0	0	0	0	0.0005	0.0007
non-dv	release	31	0.0046	0.0032	0.0009	0.0003	0.0003	0.0023	0.0088	0.003	0.0003	0.0003	0.0027	0	0	0.0001	0.0003	0.0097	0.0116	0.0163	0.0142	0.0314	0.0263	0.0282	0.0231	0.0218	0.0223	0.0194	0.0087	0.0084	0.0141	0.0131	0.0212	0.0187	0.0288	0.0161	0.0103	0.0019	0.0014	0.0004	0.0002	0.0003	0.0018	0.0009	0	0.0007	0.0009	0.0002	0.0011
non-dv	release	32	0.0097	0.0064	0.0029	0.003	0.003	0.0063	0.0016	0.0019	0.0009	0	0.0002	0.0005	0.0016	0.0025	0.0028	0.006	0.0058	0.0019	0.0002	0.0013	0.0037	0.002	0.0001	0.0001	0.0005	0.0004	0.0007	0.0007	0.0015	0.0047	0.0029	0.0003	0.0008	0.0009	0.0002	0.0001	0.0001	0	0.0003	0.001	0.0022	0.0019	0.0013	0.0009	0.0004	0.0006	0.0001
non-dv	release	33	0.0053	0.0017	0.0018	0.0007	0.0001	0	0	0.0003	0.0001	0	0	0.0001	0	0.0002	0.0001	0.0007	0.0012	0.0021	0.0054	0.0026	0.0042	0.0018	0.0032	0.0027	0.001	0.0013	0.0033	0.0055	0.0111	0.0113	0.0129	0.0141	0.0103	0.013	0.0135	0.0103	0.0101	0.0097	0.0093	0.0092	0.0081	0.0089	0.0072	0.0067	0.0059	0.0029	0.0008
non-dv	release	34	0.0005	0.0003	0.0005	0.0006	0.0001	0.0002	0.0028	0.0017	0.0004	0.0001	0.0002	0.0003	0.0012	0.0007	0.0015	0.0008	0.0064	0.0108	0.012	0.0151	0.0188	0.0163	0.019	0.0198	0.007	0.0059	0.0154	0.0189	0.0139	0.0174	0.0149	0.0088	0.0068	0.0102	0.0172	0.0218	0.0112	0.0024	0.0018	0.0019	0.0024	0.0027	0.0038	0.0021	0.0079	0.0028	0
non-dv	release	35	0.0015	0.0011	0.0024	0.0031	0.0028	0.0055	0.0067	0.0091	0.0109	0.0104	0.0076	0.0041	0.0057	0.0073	0.0075	0.0047	0.0122	0.0078	0.0085	0.0034	0.0053	0.0044	0.0025	0.0035	0.0018	0.0003	0.0005	0.0004	0	0.0022	0.0007	0.0013	0.0011	0.0014	0.001	0.0009	0	0.0008	0.0013	0.0007	0.0012	0.0012	0.0028	0.0029	0.0031	0.0035	0.0026
non-dv	release	36	0.0131	0.0066	0.0061	0.0087	0.0081	0.0076	0.0072	0.0044	0.006	0.0062	0.0047	0.0059	0.0056	0.013	0.0157	0.0127	0.014	0.0159	0.0153	0.0153	0.0175	0.0264	0.0166	0.0155	0.0142	0.0114	0.0078	0.0076	0.0118	0.0074	0.0085	0.0078	0.0038	0.0009	0	0	0	0.0003	0.0001	0.0004	0	0.0002	0.0001	0.0001	0.001	0.0004	0.0003
non-dv	release	37	0.0049	0.0134	0.0133	0.0133	0.0133	0.0135	0.0066	0.0066	0.0032	0.0044	0.0011	0.0051	0.0053	0.0037	0.0009	0.0009	0.0008	0.0006	0	0.0003	0	0.0002	0.0002	0.001	0.0021	0.0021	0	0	0.0003	0.0012	0.0103	0.0103	0.0116	0.0116	0.0192	0.0192	0.0063	0.0131	0.0137	0.0107	0.0094	0.0092	0.0094	0.017	0.0296	0.0211	0.0151
non-dv	release	38	0	0.0021	0.0007	0.0005	0.0008	0.0008	0	0	0	0	0	0.001	0.0001	0.0007	0.0015	0.0083	0.0096	0.0096	0.0069	0.0193	0.0492	0.0469	0.055	0.0552	0.0522	0.067	0.0569	0.0657	0.077	0.0683	0.0603	0.0529	0.06	0.053	0.0437	0.041	0.036	0.0313	0.0414	0.0312	0.0312	0.0327	0.0232	0.0155	0.0197	0.0106	0.0106
non-dv	release	39	0.0059	0	0	0.0003	0.0005	0.001	0.0072	0.0072	0.0072	0.006	0.009	0.0074	0.0058	0.0058	0	0.0001	0.0009	0.0009	0.0013	0.001	0.001	0.0008	0.0008	0.001	0.0008	0.0005	0.0003	0.0003	0.0001	0	0.0004	0.0004	0.0002	0.0002	0.0061	0.0046	0.0023	0.0028	0.0025	0.0057	0.0071	0.0086	0.0127	0.0123	0.0123	0.0123	0.0198
non-dv	release	40	0.0086	0.0037	0.0005	0.001	0.0002	0	0.0004	0.0007	0.0001	0.0006	0.0002	0.0017	0.0039	0.002	0.0041	0.0077	0.0143	0.0249	0.0203	0.0308	0.0221	0.0192	0.0136	0.0172	0.0134	0.0084	0.0081	0.0084	0.0089	0.0034	0.0069	0.006	0.0046	0.0072	0.0056	0.0003	0.0007	0.0002	0.0001	0.003	0.004	0.0062	0.0134	0.0217	0.0215	0.0226	0.0211
non-dv	release	41	0.0016	0.0002	0.0023	0.0022	0.0079	0.027	0.0186	0.029	0.0243	0.0437	0.0448	0.0343	0.0281	0.0269	0.0231	0.0258	0.0288	0.0234	0.0197	0.0202	0.0273	0.0102	0.004	0.0064	0.0064	0.0012	0.0004	0.0002	0.0001	0.0012	0.0003	0.0004	0.0051	0.0091	0.0216	0.0181	0.0179	0.0179	0.0226	0.0343	0.025	0.027	0.0453	0.0529	0.0635	0.0632	0.0661
non-dv	release	42	0.0035	0.0042	0.0046	0.0037	0.0019	0.0019	0.0009	0.0005	0.0005	0.0007	0.0006	0.001	0.0016	0.0004	0.0002	0.0011	0.0031	0.0023	0.0048	0.0079	0.0053	0.0046	0.0123	0.0016	0	0.0004	0.0001	0.0001	0.0001	0.0007	0.0028	0.0033	0.0059	0.0054	0.0054	0.0041	0.0042	0.0043	0.0051	0.0052	0.0053	0.006	0.0058	0.0078	0.0076	0.0065	0.008
non-dv	release	43	0.0006	0.0011	0.0001	0.0008	0.0031	0.0045	0.0073	0.005	0.0035	0.0026	0.0005	0.0006	0.0001	0.0008	0.0003	0.0006	0.001	0.0005	0.0005	0.0004	0	0.0003	0	0.0014	0.0026	0.0036	0.007	0.0092	0.0069	0.0148	0.0111	0.0084	0.0102	0.0092	0.0132	0.0186	0.0143	0.0098	0.0097	0.0164	0.0156	0.0235	0.0221	0.0193	0.0152	0.0128	0.0116
non-dv	release	44	0.0054	0.0137	0.0067	0.002	0.0034	0.0031	0.0016	0.0012	0.0021	0.0021	0.0022	0.0019	0.0009	0.0006	0.0008	0.0001	0.0001	0.0003	0.001	0.0011	0.0016	0.0016	0.0016	0.0029	0.0027	0.0052	0.0114	0.0052	0.0042	0.0076	0.0031	0.0048	0.0073	0.0101	0.0075	0.0111	0.0102	0.014	0.0175	0.012	0.0165	0.0105	0.0112	0.009	0.016	0.0145	0.0141
non-dv	release	45	0.0033	0.0049	0.0044	0.0016	0.0018	0.002	0.0033	0.0033	0.0024	0.0027	0.0023	0.0002	0.0003	0.0001	0.0001	0	0.0011	0.0054	0.0014	0.0013	0.0013	0.0001	0.0014	0.0005	0	0	0	0	0.0004	0.0005	0	0.001	0.0019	0.0023	0.0016	0.0015	0.0036	0.0076	0.0094	0.003	0.0032	0.0005	0.0014	0.0019	0.0007	0.0012	0
non-dv	release	46	0.0159	0.0172	0.0143	0.0145	0.0151	0.0293	0.0187	0.0161	0.0184	0.027	0.0293	0.051	0.0562	0.0562	0.0483	0.0517	0.0498	0.052	0.0445	0.0517	0.0369	0.0423	0.0414	0.0344	0.0335	0.025	0.0241	0.0251	0.0226	0.0203	0.0158	0.0178	0.006	0.011	0.0127	0.0127	0.0068	0.0095	0.0062	0.0054	0.004	0	0	0.0026	0.0022	0.0104	0.0164
non-dv	release	47	0.0006	0.0003	0.0006	0.0012	0.0022	0.0035	0.0002	0	0.0001	0	0	0	0	0.0005	0.0003	0.0001	0.0003	0.0004	0.0013	0.0017	0.0029	0.0048	0.0045	0.0043	0.004	0.0053	0.0062	0.011	0.0117	0.0082	0.0031	0.0023	0.0015	0.0005	0.0001	0	0	0	0	0.0001	0.0004	0	0.0008	0.0006	0.0009	0.0002	0.0011
non-dv	release	48	0	0.0008	0	0.0012	0	0.0001	0.0029	0.0002	0.0002	0.0002	0.0009	0	0.0021	0.0021	0.001	0.0001	0.0001	0.0006	0.0007	0.0001	0.0194	0.0181	0.0136	0.0319	0.0173	0.0248	0.0248	0.0065	0.0046	0.0046	0.0138	0.017	0.017	0.017	0.017	0.0031	0.0031	0.0031	0.0012	0.0038	0.0021	0.0014	0.0014	0.0014	0.0014	0.0043	0.0053
non-dv	release	49	0.0039	0.0046	0.0047	0.0033	0.0026	0.0028	0.0015	0.0026	0.0026	0.0059	0.0107	0.0132	0.0114	0.0104	0.0144	0.0161	0.0158	0.0115	0.0167	0.0125	0.0113	0.0066	0.0059	0.0058	0.0059	0.0063	0.0055	0.0058	0.0073	0.0014	0.0024	0.0011	0.0023	0.0038	0.0044	0.0054	0.007	0.0072	0.0085	0.0118	0.0205	0.0273	0.0267	0.0263	0.0216	0.0232	0.022
non-dv	release	50	0.0009	0.0001	0	0	0.0025	0.0002	0.0002	0.0014	0.0041	0.0039	0.0106	0.0097	0.0131	0.0172	0.0156	0.0178	0.0219	0.0143	0.012	0.0118	0.0073	0.0071	0.0156	0.0249	0.0238	0.0396	0.0374	0.0322	0.0344	0.0422	0.0247	0.0294	0.0288	0.032	0.0268	0.0263	0.0232	0.0193	0.0475	0.053	0.0638	0.0673	0.0459	0.0367	0.0339	0.03	0.029
non-dv	release	51	0.0027	0.0017	0.0013	0.0004	0.0004	0	0	0.0004	0.0015	0.0035	0.0061	0.0083	0.0045	0.0049	0.0063	0.0078	0.0116	0.0098	0.0137	0.0116	0.0125	0.0134	0.0125	0.0127	0.015	0.0195	0.0186	0.017	0.0128	0.0146	0.0163	0.0174	0.022	0.0222	0.0211	0.0239	0.0252	0.0212	0.0202	0.0204	0.0209	0.0226	0.0235	0.022	0.0221	0.0233	0.0297
non-dv	release	52	0.0453	0.0338	0.0264	0.0269	0.0099	0.0075	0.01	0.0065	0.0038	0.0018	0.0029	0.0004	0.0002	0.0001	0.0002	0.0012	0.0172	0.0241	0.0529	0.0501	0.05	0.0375	0.0351	0.0433	0.0424	0.0367	0.0324	0.049	0.035	0.0313	0.0333	0.0177	0.0166	0.029	0.0302	0.0166	0.0071	0.0046	0.0008	0.0041	0.0185	0.0123	0.0109	0.0062	0.0061	0.0078	0.014
non-dv	release	53	0.0079	0.0131	0.017	0.0173	0.0147	0.0072	0.0097	0.0117	0.0112	0.0107	0.011	0.0137	0.0117	0.0159	0.0134	0.0105	0.0169	0.0152	0.0074	0.0044	0.0007	0.0001	0.0001	0	0.0003	0.0002	0.0002	0.0003	0.0003	0.0011	0.0001	0.0002	0.0017	0.0005	0.0037	0.002	0	0.0003	0.0027	0.0029	0	0	0	0.0016	0.007	0.0043	0.0109
non-dv	release	54	0.0004	0.0013	0.0007	0.001	0.0011	0.0004	0.0004	0.0061	0.0166	0.0161	0.0239	0.0304	0.0256	0.0374	0.049	0.0802	0.1108	0.0929	0.1119	0.1155	0.113	0.1128	0.0936	0.0771	0.0773	0.0606	0.0538	0.0264	0.0264	0.0199	0.01	0.0071	0.0091	0.0057	0.0094	0.001	0.0034	0.0019	0.0032	0.0043	0.0119	0.0154	0.0174	0.0029	0.0018	0.0007	0.0007
non-dv	release	55	0.0533	0.0515	0.0477	0.0443	0.0451	0.0445	0.0462	0.0477	0.0478	0.0527	0.0508	0.0524	0.0533	0.0575	0.0595	0.0561	0.0606	0.058	0.0605	0.0619	0.06	0.0619	0.07	0.0751	0.0733	0.0759	0.0804	0.0828	0.0819	0.0823	0.088	0.0889	0.0914	0.0926	0.0908	0.0912	0.0899	0.0937	0.0925	0.0947	0.0942	0.0951	0.0964	0.0957	0.097	0.0984	0.0896
non-dv	release	56	0.0032	0.0041	0.0037	0.0017	0.0058	0.0042	0.0054	0.0045	0.0056	0.0055	0.0064	0.0068	0.0063	0.0053	0.0025	0.0003	0	0	0	0.0013	0.0017	0.0017	0.002	0.0015	0.0069	0.0069	0.0065	0.0054	0.0059	0.0062	0.003	0.0026	0.0023	0.0026	0.001	0.003	0.0018	0.0021	0.0017	0.0013	0	0.0002	0.0001	0	0.0001	0.0007	0.0007
non-dv	release	57	0.0166	0.0168	0.0188	0.0208	0.024	0.0173	0.0176	0.0146	0.0154	0.0105	0.0089	0.0093	0.0095	0.008	0.0055	0.0052	0.0018	0.0027	0.0012	0.0019	0.0017	0.0013	0.0007	0.001	0.0016	0.0017	0.0027	0.0028	0.0035	0.0057	0.0058	0.0055	0.0059	0.008	0.0127	0.0153	0.0189	0.0217	0.0313	0.0272	0.0361	0.0422	0.0484	0.0435	0.0177	0.0177	0.0132
non-dv	release	58	0.0022	0.0018	0.0028	0.0036	0.0057	0.0055	0.0055	0.0048	0.0048	0.0045	0.0017	0.002	0.0021	0.0026	0.0025	0.0015	0.0021	0.0004	0	0	0	0.0004	0.0001	0.0001	0.0008	0.0003	0.0002	0.0001	0.0003	0.0017	0.0096	0.0118	0.0076	0.0059	0.0018	0.0015	0.0007	0.0027	0.0048	0.0059	0.0018	0.0024	0.0039	0.005	0.006	0.0062	0.0072
non-dv	release	59	0.0003	0.0003	0.0004	0.0002	0.0003	0	0.0004	0.0009	0.0015	0.0024	0.0059	0.0066	0.0083	0.0091	0.0112	0.0055	0.0088	0.0056	0.0052	0.0066	0.0052	0.0071	0.0063	0.0064	0.0056	0.0064	0.0092	0.0085	0.0029	0.002	0.004	0.0043	0.0051	0.0063	0.0068	0.011	0.0095	0.0094	0.011	0.0089	0.0092	0.0092	0.0064	0.0079	0.0086	0.0095	0.0087
non-dv	release	60	0.0062	0.0051	0.0053	0.0084	0.0103	0.01	0.0129	0.0142	0.0177	0.0126	0.0063	0.0073	0.0022	0.0028	0.0008	0.0003	0.0001	0.0007	0	0.0014	0.0021	0.0016	0.0018	0.0025	0.0031	0.0015	0.0018	0.0008	0.0011	0.0023	0.0008	0.0011	0.0011	0.0003	0.0001	0	0.0001	0.0001	0.0001	0.0002	0.0006	0.0006	0.0001	0.0001	0	0.001	0.0017
non-dv	release	61	0.0136	0.0162	0.0173	0.0173	0.017	0.0228	0.0229	0.0285	0.0293	0.0316	0.0345	0.0302	0.026	0.0249	0.0266	0.0276	0.0338	0.0333	0.0313	0.0377	0.0344	0.0288	0.0266	0.0291	0.0298	0.0302	0.0232	0.0166	0.0142	0.0095	0.0092	0.0097	0.0136	0.014	0.0117	0.0073	0.0066	0.0026	0.0019	0.0012	0.0014	0.0008	0.0012	0.0015	0.0018	0.001	0.0023
non-dv	release	62	0.0005	0.0001	0.0008	0.0002	0.0001	0.0028	0.0024	0.0049	0.0041	0.0045	0.0042	0.0021	0.0021	0.0012	0	0	0.0003	0.0015	0	0.0001	0.001	0.0003	0	0.0002	0	0.0003	0.0012	0.0025	0.0015	0.0011	0.0007	0.0004	0.0001	0	0.0012	0.0029	0.0048	0.0086	0.0055	0.0056	0.0071	0.0024	0.0018	0.0018	0.0001	0.0016	0.0014
non-dv	release	63	0	0.0027	0.0027	0.0072	0.0095	0.0268	0.024	0.0195	0.0195	0.0233	0.0172	0.0113	0.0099	0.0077	0.0046	0.0048	0.0009	0.0001	0.0001	0.0006	0.0013	0.0032	0.004	0.0065	0.0076	0.0083	0.0088	0.0117	0.0119	0.0122	0.0087	0.0085	0.0101	0.0106	0.0082	0.0056	0.0055	0.004	0.0043	0.001	0.0006	0	0	0.0002	0.0009	0.0025	0.0024
non-dv	release	64	0.002	0.005	0.0088	0.0091	0.0076	0.0066	0.0064	0.0065	0.006	0.0068	0.0079	0.01	0.0081	0.007	0.0096	0.0084	0.01	0.0052	0.0075	0.0034	0.0015	0.0006	0.0007	0.0001	0.0009	0.0034	0.0093	0.0161	0.0183	0.0231	0.0251	0.0274	0.0302	0.0276	0.0303	0.0437	0.0467	0.0585	0.0644	0.072	0.0837	0.089	0.0941	0.1053	0.1079	0.1025	0.0838
non-dv	release	65	0.0077	0.0113	0.0181	0.0189	0.0076	0.0054	0.0088	0.0127	0.0062	0.0045	0.0036	0.0065	0.0052	0.0093	0.0098	0.0201	0.0156	0.0161	0.0138	0.0125	0.0095	0.0046	0.0017	0.0023	0.0057	0.0058	0.0114	0.0076	0.0092	0.0121	0.0114	0.0078	0.0112	0.0039	0.0022	0.0026	0.0053	0.0069	0.0176	0.016	0.0186	0.034	0.041	0.0295	0.0235	0.0437	0.0259
non-dv	release	66	0.0103	0.0089	0.0082	0.0099	0.011	0.0073	0.0102	0.0113	0.0145	0.01	0.0132	0.0135	0.0109	0.0097	0.0101	0.0151	0.0168	0.0169	0.0153	0.014	0.0127	0.0126	0.0156	0.0135	0.0133	0.0139	0.0179	0.0166	0.0195	0.0221	0.0192	0.0193	0.0191	0.0191	0.0144	0.0121	0.0124	0.0147	0.0165	0.0162	0.0152	0.0161	0.015	0.0164	0.018	0.0168	0.0134
non-dv	release	67	0.0021	0.0048	0.0068	0.0061	0.0102	0.0091	0.009	0.0133	0.0163	0.0162	0.0152	0.0122	0.0106	0.0156	0.0144	0.0141	0.0147	0.0116	0.0093	0.0054	0.0057	0.0051	0.0036	0.0032	0.001	0.0021	0.0012	0.0001	0	0.0001	0	0.0001	0.0003	0.0018	0.0012	0.0005	0.0004	0	0.0005	0.0011	0.0008	0.0013	0.0015	0.0005	0.0001	0	0.0001
non-dv	release	68	0.0002	0.0005	0.0007	0.0006	0.0012	0.0019	0.0004	0.0011	0.0056	0.0056	0.0064	0.0089	0.0084	0.0066	0.0057	0.0048	0.0047	0.0021	0.0021	0.0028	0.0022	0.0025	0.0037	0.0046	0.0018	0.0015	0.0045	0.0048	0.0044	0.0042	0.0046	0.0009	0.0003	0.0005	0.0018	0.0011	0.0009	0.0009	0.0007	0.0007	0.002	0.0012	0	0.0004	0.002	0.0022	0.0019
non-dv	release	69	0.0024	0.0026	0.0028	0.0064	0.0053	0.0089	0.0098	0.0104	0.0105	0.0135	0.0124	0.0175	0.0188	0.0134	0.0123	0.0141	0.0142	0.0107	0.0104	0.0155	0.0179	0.0253	0.0283	0.0264	0.0339	0.0307	0.0357	0.0348	0.0324	0.0321	0.0297	0.0257	0.0222	0.0296	0.0303	0.0237	0.02	0.02	0.0232	0.0171	0.0114	0.0038	0.0047	0	0.0025	0.005	0.0043
non-dv	release	70	0.0108	0.0121	0.0157	0.0173	0.0148	0.0181	0.027	0.0218	0.0176	0.0186	0.0194	0.0185	0.0161	0.0111	0.0123	0.0128	0.013	0.0125	0.0194	0.0197	0.021	0.0181	0.0141	0.0134	0.0134	0.0121	0.01	0.0138	0.0163	0.0148	0.0163	0.013	0.013	0.0153	0.0162	0.0166	0.0226	0.0229	0.0211	0.0203	0.0252	0.0274	0.0297	0.0309	0.0326	0.0254	0.0306
non-dv	release	71	0.0034	0.002	0.0011	0.0016	0.0011	0.0008	0.0005	0.0001	0.001	0.0009	0.0011	0.0025	0.0024	0.0037	0.0034	0.0031	0.0034	0.0026	0.0024	0.0014	0.0005	0.0011	0.0028	0.0029	0.0071	0.0077	0.0092	0.0112	0.0113	0.0137	0.0136	0.0165	0.0183	0.0226	0.0241	0.0262	0.0292	0.0299	0.0287	0.0331	0.0374	0.0388	0.0351	0.0398	0.0432	0.0455	0.0433
non-dv	release	72	0.0166	0.013	0.0135	0.0124	0.0147	0.0124	0.0107	0.0091	0.0097	0.0059	0.0066	0.0044	0.003	0.0056	0.0038	0.0031	0.0042	0.01	0.0061	0.0073	0.0107	0.01	0.0025	0.0042	0.0036	0.0053	0.0065	0.0051	0.007	0.0098	0.0098	0.0101	0.0092	0.0039	0.0012	0.0003	0.0001	0.0001	0.0002	0.0005	0.0015	0.0014	0.0001	0.0004	0.0004	0.001	0.0011
non-dv	release	73	0.0013	0.0011	0.0018	0.0064	0.0084	0.0075	0.0142	0.0104	0.0106	0.0087	0.0194	0.0172	0.015	0.023	0.0206	0.0216	0.0303	0.0339	0.032	0.0275	0.0268	0.0255	0.0362	0.0295	0.0284	0.0252	0.0189	0.0215	0.0269	0.0316	0.0349	0.0347	0.0356	0.0318	0.0363	0.0333	0.0255	0.0277	0.0362	0.0296	0.0222	0.0289	0.0191	0.0248	0.0216	0.021	0.0187
dv	release	1	0.0034	0.0043	0.0041	0.006	0.0037	0.0002	0	0.0001	0.0001	0.0012	0.0015	0.0011	0.0011	0.0038	0.0162	0.0047	0.0094	0.0121	0.0092	0.0096	0.0076	0.0072	0.0031	0.0039	0.0017	0.0004	0.0009	0.0009	0.0002	0.0013	0.002	0.0173	0.0179	0.0168	0.025	0.0184	0.0178	0.0299	0.0295	0.0292	0.03	0.0266	0.0139	0.0085	0.0167	0.0115	0.0108
dv	release	2	0.0027	0.0021	0.0015	0.0016	0.0026	0.0004	0.0024	0.0003	0.0013	0.0032	0.0038	0.0044	0.0032	0.0012	0.0008	0.0015	0.0012	0.0033	0.0078	0.0092	0.0085	0.0089	0.0081	0.0083	0.0041	0.0124	0.0029	0.0048	0.0037	0.0063	0.008	0.0061	0.0092	0.0119	0.0048	0.0005	0.0007	0.0028	0.0003	0.0004	0.0006	0.0009	0.0008	0.0016	0.0007	0.0033	0.0008
dv	release	3	0.0991	0.0986	0.1048	0.1172	0.1249	0.1248	0.1196	0.1132	0.1052	0.1008	0.0978	0.0945	0.088	0.091	0.0968	0.0935	0.0926	0.0929	0.086	0.0973	0.0892	0.0942	0.0925	0.0931	0.0899	0.0865	0.0915	0.0953	0.0933	0.0912	0.0842	0.0876	0.0937	0.0954	0.0905	0.0853	0.0968	0.0998	0.1058	0.1087	0.106	0.1106	0.1108	0.1014	0.1107	0.1245	0.1094
dv	release	4	0.0604	0.0569	0.0561	0.0582	0.0556	0.0604	0.0423	0.0376	0.0277	0.0353	0.0293	0.0227	0.0183	0.0142	0.0477	0.0432	0.0325	0.0237	0.0208	0.0229	0.0228	0.0209	0.0183	0.0108	0.0153	0.0057	0.0097	0.0047	0.011	0.0104	0.0098	0.0109	0.0209	0.02	0.0046	0.0135	0.0098	0.0119	0.0167	0.0145	0.0195	0.0226	0.0179	0.0234	0.0293	0.0429	0.0504
dv	release	5	0.0189	0.0217	0.0197	0.0178	0.0232	0.0248	0.022	0.0212	0.0229	0.0195	0.0252	0.0237	0.0285	0.0281	0.0344	0.0388	0.0402	0.0356	0.0375	0.0429	0.0338	0.0397	0.0458	0.0452	0.0404	0.0417	0.04	0.0415	0.0365	0.0415	0.0395	0.0387	0.0414	0.0408	0.0348	0.0243	0.0222	0.0252	0.0181	0.0159	0.0215	0.0198	0.0211	0.0168	0.0216	0.023	0.0221
dv	release	6	0.0074	0.0093	0.0271	0.0359	0.0396	0.0412	0.0477	0.0549	0.0495	0.0506	0.0724	0.0707	0.0638	0.0686	0.0695	0.0699	0.0699	0.0649	0.0626	0.0762	0.0608	0.0603	0.0354	0.0525	0.0443	0.0364	0.0265	0.0183	0.0137	0.0121	0.0078	0.0103	0.0113	0.0178	0.0209	0.0221	0.0252	0.0205	0.0189	0.0137	0.0233	0.0316	0.0349	0.0575	0.0704	0.0676	0.0747
dv	release	7	0.0001	0.0001	0.0008	0.0003	0.0003	0	0	0.0001	0.0002	0	0	0	0	0	0.0004	0.0008	0.0017	0.002	0.0009	0.0019	0.0021	0.0009	0.0002	0.0002	0.0003	0.0008	0.0009	0.001	0.0007	0	0.0001	0.0008	0.0008	0.0029	0.0048	0.0054	0.0061	0.0066	0.007	0.0102	0.0114	0.0142	0.0133	0.0105	0.0133	0.0169	0.0181
dv	release	8	0.0092	0.0079	0.0102	0.0144	0.0195	0.0191	0.0251	0.031	0.0278	0.0289	0.0317	0.0185	0.0185	0.0078	0.0059	0.0089	0.0179	0.0271	0.0294	0.031	0.0407	0.0408	0.0297	0.019	0.0013	0.0013	0.0005	0.0039	0.0006	0.004	0.006	0.0023	0.0029	0.0001	0	0	0.0012	0.001	0.001	0.0007	0.0004	0.0005	0	0.0006	0.0013	0.0013	0.0034
dv	release	9	0.049	0.0443	0.0447	0.0478	0.0461	0.0387	0.032	0.023	0.0274	0.0294	0.0326	0.026	0.0228	0.0254	0.034	0.04	0.0322	0.0285	0.0314	0.0303	0.0365	0.0384	0.0359	0.029	0.0239	0.0266	0.036	0.0474	0.0396	0.0371	0.0335	0.0417	0.0382	0.0429	0.0453	0.0413	0.0355	0.039	0.0415	0.0423	0.0343	0.0405	0.0319	0.0164	0.016	0.0169	0.0166
dv	release	10	0.0157	0.0157	0.0089	0.0252	0.0355	0.0355	0.0355	0.0556	0.0556	0.0405	0.0296	0.0253	0.0253	0.0253	0.0203	0.0203	0.0203	0.0159	0.0253	0.0366	0.0578	0.0578	0.0899	0.07	0.0592	0.0592	0.0592	0.0473	0.0675	0.1287	0.15	0.1558	0.1558	0.1558	0.1558	0.1858	0.1858	0.1934	0.1626	0.1626	0.1332	0.1513	0.1626	0.1934	0.1934	0.2299	0.2617
dv	release	11	0.0033	0.0047	0.0067	0.0046	0.0023	0.0035	0.0037	0.0076	0.0116	0.0126	0.0129	0.0184	0.0195	0.0212	0.0123	0.0212	0.0256	0.0221	0.0238	0.0302	0.0425	0.0393	0.0366	0.0323	0.0408	0.0352	0.0247	0.0154	0.0169	0.0209	0.0142	0.011	0.0109	0.0103	0.0184	0.0182	0.0143	0.0138	0.0147	0.0188	0.0188	0.022	0.022	0.022	0.0148	0.0163	0.0237
dv	release	12	0.0003	0.0006	0.0035	0.0012	0.0049	0.0025	0.0048	0.009	0.0123	0.0235	0.0123	0.0059	0.0069	0.0004	0.0003	0.0003	0	0.004	0.0035	0.0046	0.0029	0.0003	0.0003	0.0013	0.0013	0.0012	0.0012	0.0012	0.0021	0.0001	0.0074	0.0089	0.0161	0.0207	0.0181	0.0185	0.0243	0.01	0.0112	0.0112	0.0221	0.0221	0.0381	0.0345	0.0273	0.0306	0.0288
dv	release	13	0.0354	0.0373	0.0389	0.0429	0.0418	0.0397	0.0382	0.0357	0.0295	0.0269	0.0226	0.0205	0.0213	0.0225	0.0191	0.0167	0.0157	0.0122	0.0098	0.0085	0.0088	0.0053	0.0061	0.0021	0.0013	0.0009	0.0006	0.0001	0.0003	0	0	0.0002	0.0001	0.0005	0.0001	0.0001	0	0.0001	0.0001	0	0	0.0004	0.0004	0.0019	0.0017	0.0016	0.0007
dv	release	14	0.0188	0.0213	0.0168	0.016	0.0148	0.0126	0.0124	0.0124	0.0135	0.0104	0.0081	0.0084	0.0106	0.0047	0.0042	0.0042	0.0045	0.0141	0.0146	0.0146	0.0146	0.0135	0.0118	0.0092	0.0092	0.0092	0.0032	0.0042	0.0001	0.0001	0.0001	0	0.0049	0.0038	0.0097	0.0099	0.0305	0.0412	0.0619	0.0619	0.0619	0.0453	0.0491	0.0468	0.0394	0.069	0.0755
dv	release	15	0.1007	0.0989	0.0997	0.1042	0.1119	0.1359	0.1392	0.1582	0.1346	0.1422	0.1574	0.1682	0.1995	0.181	0.1855	0.1915	0.2236	0.2147	0.2115	0.2244	0.2592	0.2729	0.2763	0.2707	0.2796	0.2594	0.2456	0.2363	0.2493	0.2347	0.2377	0.2663	0.2602	0.2932	0.3018	0.3121	0.3057	0.3237	0.3619	0.3721	0.3729	0.3595	0.3475	0.3598	0.3556	0.3917	0.4272
dv	release	16	0.022	0.0262	0.0047	0.0016	0.0009	0.0025	0.0091	0.0074	0.0039	0.0043	0.007	0.008	0.0061	0.0061	0.0078	0.0101	0.007	0.0097	0.0085	0.0085	0.0104	0.009	0.0147	0.0167	0.0177	0.0137	0.0124	0.0154	0.0213	0.0216	0.009	0.005	0.0143	0.0138	0.0084	0.0044	0.002	0.0005	0.0057	0.013	0.0247	0.0131	0.0086	0.0065	0.0052	0.0034	0.0062
dv	release	17	0.1298	0.1177	0.1436	0.1448	0.1616	0.1657	0.1516	0.1827	0.1991	0.2031	0.1953	0.1996	0.2103	0.2031	0.1959	0.1823	0.1834	0.1945	0.1924	0.1879	0.1996	0.199	0.1735	0.193	0.185	0.1686	0.1556	0.1583	0.1449	0.1502	0.1592	0.1896	0.1801	0.1746	0.1653	0.1806	0.168	0.1719	0.1434	0.1435	0.149	0.1543	0.1697	0.1632	0.1503	0.1595	0.1746
dv	release	18	0.0436	0.044	0.0442	0.0425	0.0444	0.0454	0.0437	0.0419	0.0377	0.0401	0.0447	0.0469	0.0475	0.0522	0.049	0.0536	0.0518	0.0463	0.048	0.0538	0.0441	0.04	0.041	0.0432	0.0438	0.0423	0.037	0.0413	0.0417	0.0388	0.0336	0.0338	0.0334	0.0301	0.031	0.0331	0.035	0.0361	0.0354	0.0343	0.0426	0.0514	0.0542	0.0538	0.0547	0.052	0.0567
dv	release	19	0.0262	0.0268	0.0304	0.0353	0.0351	0.0385	0.0358	0.0335	0.0291	0.0365	0.0351	0.0347	0.0387	0.0408	0.0408	0.0415	0.0422	0.039	0.0398	0.0366	0.0393	0.0429	0.0399	0.0463	0.0424	0.0379	0.0405	0.0404	0.046	0.0394	0.0384	0.0409	0.0411	0.0405	0.0367	0.0353	0.0351	0.0357	0.0323	0.0379	0.0382	0.0408	0.0395	0.0405	0.0396	0.0361	0.0312
dv	release	20	0.0026	0.0014	0.0015	0	0	0	0.0003	0.0006	0.0004	0.0006	0.0022	0.0006	0.002	0.0018	0.0017	0.0003	0.0006	0	0.0001	0.0003	0.0019	0.0031	0.0037	0.0039	0.0023	0.0067	0.0149	0.0129	0.0112	0.0126	0.0094	0.0091	0.0078	0.01	0.0165	0.0176	0.0145	0.0125	0.0123	0.019	0.0149	0.0119	0.0079	0.0085	0.0109	0.0043	0.0029
dv	release	21	0.0004	0.0001	0.0002	0.002	0.0009	0.0018	0.0017	0.0017	0.0014	0.0013	0.0033	0.0092	0.0102	0.0107	0.012	0.0142	0.0061	0.0042	0.003	0.0037	0.0029	0.0031	0.0017	0.002	0.0035	0.0013	0.0007	0.0015	0.0005	0.0001	0.0002	0.0025	0.0024	0.0046	0.009	0.0072	0.0055	0.0036	0.0032	0.0019	0.0031	0.0045	0.0051	0.0125	0.014	0.0072	0.0016
dv	release	22	0.0203	0.024	0.0257	0.0263	0.0314	0.0282	0.0263	0.0252	0.0267	0.0251	0.025	0.025	0.0286	0.0265	0.0234	0.0273	0.0287	0.0293	0.0313	0.032	0.0355	0.0326	0.0336	0.0289	0.0282	0.0305	0.0351	0.0353	0.0341	0.0333	0.0367	0.0381	0.0366	0.039	0.0401	0.0419	0.0445	0.046	0.0492	0.049	0.0521	0.055	0.054	0.0568	0.0589	0.0601	0.0591
dv	release	23	0.0315	0.0396	0.0431	0.0434	0.0348	0.0298	0.0246	0.0176	0.0155	0.0189	0.0159	0.0183	0.0186	0.0229	0.019	0.031	0.0377	0.0429	0.0393	0.0483	0.0447	0.0459	0.0453	0.0433	0.039	0.0429	0.0595	0.0623	0.0706	0.0626	0.0545	0.0592	0.0638	0.0539	0.0746	0.0624	0.0499	0.0489	0.0586	0.0504	0.0631	0.0564	0.0626	0.0688	0.0666	0.0689	0.0451
dv	release	24	0.1499	0.1502	0.1366	0.1606	0.2085	0.2158	0.2346	0.233	0.2279	0.247	0.2368	0.2545	0.2676	0.2464	0.2434	0.2551	0.2406	0.2515	0.2499	0.2566	0.262	0.2672	0.2724	0.2701	0.237	0.2397	0.2179	0.2378	0.2308	0.2533	0.2416	0.2337	0.1854	0.1814	0.1787	0.1785	0.1948	0.2058	0.2253	0.2168	0.2295	0.2387	0.2758	0.2822	0.2972	0.2816	0.2427
dv	release	25	0.0168	0.0117	0.0074	0.0042	0.0044	0.0027	0.0075	0.0061	0.006	0.0075	0.0115	0.0085	0.0105	0.0089	0.0164	0.0135	0.0159	0.0165	0.0251	0.025	0.0195	0.0191	0.0229	0.0238	0.0236	0.0228	0.0233	0.0306	0.0329	0.0346	0.0317	0.0465	0.047	0.0601	0.0492	0.0497	0.039	0.0507	0.0481	0.0527	0.0629	0.0745	0.0692	0.0732	0.1005	0.1579	0.1353
dv	release	26	0.0424	0.0383	0.0418	0.0349	0.0379	0.0439	0.0346	0.0497	0.045	0.0385	0.0387	0.0395	0.0313	0.0291	0.0254	0.0145	0.0066	0.0073	0.0062	0.0037	0.0067	0.0043	0.0087	0.0055	0.0037	0.0042	0.0037	0	0.0039	0.0198	0.0191	0.0326	0.0398	0.0659	0.0554	0.0501	0.0507	0.0524	0.0467	0.0336	0.0296	0.0419	0.0424	0.0528	0.0511	0.0452	0.046
dv	release	27	0.0013	0.0008	0.0022	0.0024	0.0044	0.0074	0.0063	0.011	0.0093	0.0118	0.0074	0.0065	0.0033	0.0053	0.004	0.0037	0.0018	0.0008	0.0037	0.0065	0.0072	0.0074	0.006	0.009	0.0103	0.0124	0.017	0.0149	0.0121	0.0113	0.0113	0.0165	0.0177	0.0189	0.0181	0.0154	0.0228	0.0313	0.024	0.0218	0.0298	0.0324	0.0338	0.0302	0.0284	0.0254	0.0226
[truncated: 154 more columns]
