# Supplementary material for: Single caudate neurons encode temporally discounted value for formulating motivation for action
Source: eLife. 2021 Jul 30;10:e61248. doi: 10.7554/eLife.61248 (PMC8352586; doi:10.7554/eLife.61248)
Supplement: Figure 7—source data 1. [file elife-61248-fig7-data1.xls]

## Sheet: D
monkey_name	ID	Session	condition	delay	reward	error_rate
ST	163	1	con	0	1	0.75
ST	163	1	con	3.3	1	6.38
ST	163	1	con	6.9	1	8.97
ST	163	1	con	0	3	0
ST	163	1	con	3.3	3	2.22
ST	163	1	con	6.9	3	5.67
ST	163	2	con	0	1	1.47
ST	163	2	con	3.3	1	6.29
ST	163	2	con	6.9	1	6.94
ST	163	2	con	0	3	1.47
ST	163	2	con	3.3	3	1.48
ST	163	2	con	6.9	3	1.47
ST	163	3	con	0	1	0.71
ST	163	3	con	3.3	1	0
ST	163	3	con	6.9	1	4.14
ST	163	3	con	0	3	0
ST	163	3	con	3.3	3	0.71
ST	163	3	con	6.9	3	1.42
ST	163	4	con	0	1	2.22
ST	163	4	con	3.3	1	5
ST	163	4	con	6.9	1	13.64
ST	163	4	con	0	3	0.75
ST	163	4	con	3.3	3	0
ST	163	4	con	6.9	3	2.92
ST	163	5	con	0	1	0
ST	163	5	con	3.3	1	6.99
ST	163	5	con	6.9	1	11.33
ST	163	5	con	0	3	0
ST	163	5	con	3.3	3	0
ST	163	5	con	6.9	3	0
ST	163	6	inactivate	0	1	1.49
ST	163	6	inactivate	3.3	1	16.56
ST	163	6	inactivate	6.9	1	16.56
ST	163	6	inactivate	0	3	0.75
ST	163	6	inactivate	3.3	3	5.71
ST	163	6	inactivate	6.9	3	10.81
ST	163	7	inactivate	0	1	3.62
ST	163	7	inactivate	3.3	1	12.58
ST	163	7	inactivate	6.9	1	9.59
ST	163	7	inactivate	0	3	0
ST	163	7	inactivate	3.3	3	2.21
ST	163	7	inactivate	6.9	3	9.52
ST	163	8	inactivate	0	1	0.75
ST	163	8	inactivate	3.3	1	11.33
ST	163	8	inactivate	6.9	1	11.33
ST	163	8	inactivate	0	3	0.75
ST	163	8	inactivate	3.3	3	2.21
ST	163	8	inactivate	6.9	3	8.9
ST	163	9	inactivate	0	1	4.38
ST	163	9	inactivate	3.3	1	21.08
ST	163	9	inactivate	6.9	1	19.63
ST	163	9	inactivate	0	3	0.76
ST	163	9	inactivate	3.3	3	7.8
ST	163	9	inactivate	6.9	3	11.49
ST	163	10	inactivate	0	1	1.47
ST	163	10	inactivate	3.3	1	7.59
ST	163	10	inactivate	6.9	1	12.5
ST	163	10	inactivate	0	3	0
ST	163	10	inactivate	3.3	3	7.64
ST	163	10	inactivate	6.9	3	3.62
RI	181	11	con	0	1	0.89
RI	181	11	con	3.3	1	3.45
RI	181	11	con	6.9	1	15.91
RI	181	11	con	0	3	3.48
RI	181	11	con	3.3	3	0
RI	181	11	con	6.9	3	5.13
RI	181	12	con	0	1	4.84
RI	181	12	con	3.3	1	18.06
RI	181	12	con	6.9	1	28.05
RI	181	12	con	0	3	5.6
RI	181	12	con	3.3	3	7.81
RI	181	12	con	6.9	3	6.3
RI	181	13	con	0	1	0.78
RI	181	13	con	3.3	1	6.57
RI	181	13	con	6.9	1	13.51
RI	181	13	con	0	3	3.03
RI	181	13	con	3.3	3	6.57
RI	181	13	con	6.9	3	8.63
RI	181	14	con	0	1	2.65
RI	181	14	con	3.3	1	14.06
RI	181	14	con	6.9	1	18.52
RI	181	14	con	0	3	0.9
RI	181	14	con	3.3	3	9.84
RI	181	14	con	6.9	3	10.57
RI	181	15	con	0	1	4.26
RI	181	15	con	3.3	1	23.08
RI	181	15	con	6.9	1	23.73
RI	181	15	con	0	3	3.23
RI	181	15	con	3.3	3	14.95
RI	181	15	con	6.9	3	18.75
RI	181	16	inactivate	0	1	5.93
RI	181	16	inactivate	3.3	1	7.3
RI	181	16	inactivate	6.9	1	17.53
RI	181	16	inactivate	0	3	1.54
RI	181	16	inactivate	3.3	3	9.93
RI	181	16	inactivate	6.9	3	13.51
RI	181	17	inactivate	0	1	7.5
RI	181	17	inactivate	3.3	1	19.57
RI	181	17	inactivate	6.9	1	21.43
RI	181	17	inactivate	0	3	3.48
RI	181	17	inactivate	3.3	3	11.9
RI	181	17	inactivate	6.9	3	21.28
RI	181	18	inactivate	0	1	26.73
RI	181	18	inactivate	3.3	1	15.73
RI	181	18	inactivate	6.9	1	21.88
RI	181	18	inactivate	0	3	0
RI	181	18	inactivate	3.3	3	14.94
RI	181	18	inactivate	6.9	3	11.76
RI	181	19	inactivate	0	1	0
RI	181	19	inactivate	3.3	1	15.38
RI	181	19	inactivate	6.9	1	15.38
RI	181	19	inactivate	0	3	0
RI	181	19	inactivate	3.3	3	5.71
RI	181	19	inactivate	6.9	3	21.95
RI	181	20	inactivate	0	1	7.41
RI	181	20	inactivate	3.3	1	21.05
RI	181	20	inactivate	6.9	1	39.52
RI	181	20	inactivate	0	3	11.76
RI	181	20	inactivate	3.3	3	25.49
RI	181	20	inactivate	6.9	3	34.78
BI	188	21	con	0	1	0.83
BI	188	21	con	3.3	1	2.46
BI	188	21	con	6.9	1	9.77
BI	188	21	con	0	4	0
BI	188	21	con	3.3	4	0.83
BI	188	21	con	6.9	4	4
BI	188	22	con	0	1	1.63
BI	188	22	con	3.3	1	4.76
BI	188	22	con	6.9	1	6.25
BI	188	22	con	0	4	0.83
BI	188	22	con	3.3	4	4
BI	188	22	con	6.9	4	3.23
BI	188	23	con	0	1	0.82
BI	188	23	con	3.3	1	1.63
BI	188	23	con	6.9	1	9.02
BI	188	23	con	0	4	0
BI	188	23	con	3.3	4	0
BI	188	23	con	6.9	4	1.61
BI	188	24	con	0	1	0
BI	188	24	con	3.3	1	0.81
BI	188	24	con	6.9	1	6.87
BI	188	24	con	0	4	0
BI	188	24	con	3.3	4	0
BI	188	24	con	6.9	4	2.38
BI	188	25	con	0	1	0.81
BI	188	25	con	3.3	1	2.38
BI	188	25	con	6.9	1	3.94
BI	188	25	con	0	4	0.81
BI	188	25	con	3.3	4	0.81
BI	188	25	con	6.9	4	0
BI	188	26	inactivate	0	1	3.17
BI	188	26	inactivate	3.3	1	3.17
BI	188	26	inactivate	6.9	1	4.69
BI	188	26	inactivate	0	4	0.81
BI	188	26	inactivate	3.3	4	1.61
BI	188	26	inactivate	6.9	4	1.61
BI	188	27	inactivate	0	1	0.76
BI	188	27	inactivate	3.3	1	2.24
BI	188	27	inactivate	6.9	1	3.68
BI	188	27	inactivate	0	4	0
BI	188	27	inactivate	3.3	4	0.76
BI	188	27	inactivate	6.9	4	2.24
BI	188	28	inactivate	0	1	1.61
BI	188	28	inactivate	3.3	1	3.94
BI	188	28	inactivate	6.9	1	4.69
BI	188	28	inactivate	0	4	0.81
BI	188	28	inactivate	3.3	4	3.17
BI	188	28	inactivate	6.9	4	1.61
BI	188	29	inactivate	0	1	0
BI	188	29	inactivate	3.3	1	2.38
BI	188	29	inactivate	6.9	1	4.65
BI	188	29	inactivate	0	4	1.6
BI	188	29	inactivate	3.3	4	2.38
BI	188	29	inactivate	6.9	4	0.81
BI	188	30	inactivate	0	1	4.17
BI	188	30	inactivate	3.3	1	7.07
BI	188	30	inactivate	6.9	1	11.54
BI	188	30	inactivate	0	4	2.13
BI	188	30	inactivate	3.3	4	12.38
BI	188	30	inactivate	6.9	4	8.08
ST	163	463	base	0	1	0.746269
ST	163	464	base	0	1	2.22222
ST	163	465	base	0	1	0
ST	163	466	base	0	1	0
ST	163	471	base	0	1	0.769231
ST	163	472	base	0	1	2.17391
ST	163	473	base	0	1	3.25203
ST	163	485	base	0	1	5.60748
ST	163	486	base	0	1	0.990099
ST	163	561	base	0	1	0
ST	163	562	base	0	1	0.757576
ST	163	563	base	0	1	3.62319
ST	163	564	base	0	1	0
ST	163	567	base	0	1	1.48148
ST	163	568	base	0	1	0.746269
ST	163	569	base	0	1	0.740741
ST	163	570	base	0	1	1.45985
ST	163	571	base	0	1	0.740741
ST	163	574	base	0	1	2.98507
ST	163	578	base	0	1	3.67647
ST	163	581	base	0	1	2.89855
ST	163	582	base	0	1	2.20588
ST	163	583	base	0	1	2.22222
ST	163	584	base	0	1	1.48148
ST	163	585	base	0	1	0.746269
ST	163	588	base	0	1	3.62319
ST	163	590	base	0	1	2.14286
ST	163	592	base	0	1	2.20588
ST	163	463	base	3.3	1	6.33803
ST	163	464	base	3.3	1	8.96552
ST	163	465	base	3.3	1	7.19424
ST	163	466	base	3.3	1	2.96296
ST	163	471	base	3.3	1	9.15493
ST	163	472	base	3.3	1	1.45985
ST	163	473	base	3.3	1	11.7647
ST	163	485	base	3.3	1	8.18182
ST	163	486	base	3.3	1	9.09091
ST	163	561	base	3.3	1	5.03597
ST	163	562	base	3.3	1	3.64964
ST	163	563	base	3.3	1	7.69231
ST	163	564	base	3.3	1	6.42857
ST	163	567	base	3.3	1	5
ST	163	568	base	3.3	1	0.746269
ST	163	569	base	3.3	1	3.59712
ST	163	570	base	3.3	1	2.17391
ST	163	571	base	3.3	1	3.62319
ST	163	574	base	3.3	1	5.14706
ST	163	578	base	3.3	1	7.74648
ST	163	581	base	3.3	1	4.96454
ST	163	582	base	3.3	1	2.22222
ST	163	583	base	3.3	1	6.33803
ST	163	584	base	3.3	1	4.31655
ST	163	585	base	3.3	1	6.33803
ST	163	588	base	3.3	1	3.62319
ST	163	590	base	3.3	1	2.12766
ST	163	592	base	3.3	1	3.64964
ST	163	463	base	6.9	1	12.987
ST	163	464	base	6.9	1	8.96552
ST	163	465	base	6.9	1	16.2338
ST	163	466	base	6.9	1	9.58904
ST	163	471	base	6.9	1	15.6863
ST	163	472	base	6.9	1	10.0671
ST	163	473	base	6.9	1	21.1921
ST	163	485	base	6.9	1	9.82143
ST	163	486	base	6.9	1	15.8333
ST	163	561	base	6.9	1	2.91971
ST	163	562	base	6.9	1	9.02778
ST	163	563	base	6.9	1	7.04225
ST	163	564	base	6.9	1	7.0922
ST	163	567	base	6.9	1	7.58621
ST	163	568	base	6.9	1	10.8108
ST	163	569	base	6.9	1	5.6338
ST	163	570	base	6.9	1	6.29371
ST	163	571	base	6.9	1	5.6338
ST	163	574	base	6.9	1	10.3448
ST	163	578	base	6.9	1	10.8844
ST	163	581	base	6.9	1	3.62319
ST	163	582	base	6.9	1	2.22222
ST	163	583	base	6.9	1	8.90411
ST	163	584	base	6.9	1	12.4183
ST	163	585	base	6.9	1	10.1351
ST	163	588	base	6.9	1	6.99301
ST	163	590	base	6.9	1	5.51724
ST	163	592	base	6.9	1	8.96552
ST	163	463	base	0	3	2.91971
ST	163	464	base	0	3	0
ST	163	465	base	0	3	1.52672
ST	163	466	base	0	3	1.50376
ST	163	471	base	0	3	0
ST	163	472	base	0	3	0
ST	163	473	base	0	3	1.63934
ST	163	485	base	0	3	0.980392
ST	163	486	base	0	3	0
ST	163	561	base	0	3	0
ST	163	562	base	0	3	1.50376
ST	163	563	base	0	3	1.49254
ST	163	564	base	0	3	0
ST	163	567	base	0	3	1.47059
ST	163	568	base	0	3	0
ST	163	569	base	0	3	0.735294
ST	163	570	base	0	3	0
ST	163	571	base	0	3	0
ST	163	574	base	0	3	0
ST	163	578	base	0	3	1.51515
ST	163	581	base	0	3	0.740741
ST	163	582	base	0	3	0.746269
ST	163	583	base	0	3	0
ST	163	584	base	0	3	0.746269
ST	163	585	base	0	3	1.48148
ST	163	588	base	0	3	3.62319
ST	163	590	base	0	3	0
ST	163	592	base	0	3	0.75188
ST	163	463	base	3.3	3	4.28571
ST	163	464	base	3.3	3	3.62319
ST	163	465	base	3.3	3	0
ST	163	466	base	3.3	3	2.23881
ST	163	471	base	3.3	3	5.83942
ST	163	472	base	3.3	3	3.57143
ST	163	473	base	3.3	3	3.25203
ST	163	485	base	3.3	3	1.94175
ST	163	486	base	3.3	3	9.90991
ST	163	561	base	3.3	3	1.49254
ST	163	562	base	3.3	3	0.75188
ST	163	563	base	3.3	3	0.75188
ST	163	564	base	3.3	3	0.757576
ST	163	567	base	3.3	3	1.48148
ST	163	568	base	3.3	3	1.48148
ST	163	569	base	3.3	3	0.740741
ST	163	570	base	3.3	3	1.45985
ST	163	571	base	3.3	3	0.746269
ST	163	574	base	3.3	3	2.25564
ST	163	578	base	3.3	3	2.98507
ST	163	581	base	3.3	3	0
ST	163	582	base	3.3	3	2.94118
ST	163	583	base	3.3	3	0.746269
ST	163	584	base	3.3	3	0.746269
ST	163	585	base	3.3	3	1.48148
ST	163	588	base	3.3	3	0.740741
ST	163	590	base	3.3	3	0.719424
ST	163	592	base	3.3	3	5.03597
ST	163	463	base	6.9	3	4.28571
ST	163	464	base	6.9	3	2.94118
ST	163	465	base	6.9	3	5.14706
ST	163	466	base	6.9	3	4.37956
ST	163	471	base	6.9	3	5.88235
ST	163	472	base	6.9	3	0.735294
ST	163	473	base	6.9	3	2.45902
ST	163	485	base	6.9	3	4.71698
ST	163	486	base	6.9	3	2.88462
ST	163	561	base	6.9	3	5.03597
ST	163	562	base	6.9	3	0.75188
ST	163	563	base	6.9	3	2.20588
ST	163	564	base	6.9	3	2.96296
ST	163	567	base	6.9	3	4.31655
ST	163	568	base	6.9	3	0.746269
ST	163	569	base	6.9	3	2.89855
ST	163	570	base	6.9	3	2.8777
ST	163	571	base	6.9	3	2.89855
ST	163	574	base	6.9	3	7.80142
ST	163	578	base	6.9	3	6.42857
ST	163	581	base	6.9	3	2.20588
ST	163	582	base	6.9	3	2.94118
ST	163	583	base	6.9	3	1.49254
ST	163	584	base	6.9	3	5
ST	163	585	base	6.9	3	2.20588
ST	163	588	base	6.9	3	1.48148
ST	163	590	base	6.9	3	1.42857
ST	163	592	base	6.9	3	4.34783
RI	181	170	base	0	1	1.52672
RI	181	172	base	0	1	0.769231
RI	181	173	base	0	1	3.05344
RI	181	178	base	0	1	0.769231
RI	181	184	base	0	1	0.78125
RI	181	185	base	0	1	1.5873
RI	181	188	base	0	1	1.75439
RI	181	192	base	0	1	0.877193
RI	181	193	base	0	1	3.48837
RI	181	198	base	0	1	2.25564
RI	181	200	base	0	1	4.34783
RI	181	205	base	0	1	0
RI	181	212	base	0	1	2
RI	181	213	base	0	1	2.65487
RI	181	170	base	3.3	1	11.0345
RI	181	172	base	3.3	1	8.51064
RI	181	173	base	3.3	1	5.26316
RI	181	178	base	3.3	1	3.7037
RI	181	184	base	3.3	1	3.0303
RI	181	185	base	3.3	1	3.125
RI	181	188	base	3.3	1	7.43802
RI	181	192	base	3.3	1	7.43802
RI	181	193	base	3.3	1	4.5977
RI	181	198	base	3.3	1	1.51515
RI	181	200	base	3.3	1	9.83607
RI	181	205	base	3.3	1	5.88235
RI	181	212	base	3.3	1	12.6126
RI	181	213	base	3.3	1	16.4179
RI	181	170	base	6.9	1	18.9873
RI	181	172	base	6.9	1	7.85714
RI	181	173	base	6.9	1	13.1034
RI	181	178	base	6.9	1	6.52174
RI	181	184	base	6.9	1	11.1888
RI	181	185	base	6.9	1	14.5833
RI	181	188	base	6.9	1	15.2672
RI	181	192	base	6.9	1	16.4179
RI	181	193	base	6.9	1	12.5
RI	181	198	base	6.9	1	13.9073
RI	181	200	base	6.9	1	20.2899
RI	181	205	base	6.9	1	9.92908
RI	181	212	base	6.9	1	14.9123
RI	181	213	base	6.9	1	15.2672
RI	181	170	base	0	3	3.0303
RI	181	172	base	0	3	0
RI	181	173	base	0	3	0.787402
RI	181	178	base	0	3	0.763359
RI	181	184	base	0	3	0.78125
RI	181	185	base	0	3	1.5873
RI	181	188	base	0	3	0.892857
RI	181	192	base	0	3	1.73913
RI	181	193	base	0	3	1.19048
RI	181	198	base	0	3	0
RI	181	200	base	0	3	0
RI	181	205	base	0	3	1.55039
RI	181	212	base	0	3	3
RI	181	213	base	0	3	0
RI	181	170	base	3.3	3	7.91367
RI	181	172	base	3.3	3	5.14706
RI	181	173	base	3.3	3	1.55039
RI	181	178	base	3.3	3	1.52672
RI	181	184	base	3.3	3	5.88235
RI	181	185	base	3.3	3	4.61538
RI	181	188	base	3.3	3	4.31034
RI	181	192	base	3.3	3	0
RI	181	193	base	3.3	3	0
RI	181	198	base	3.3	3	3.67647
RI	181	200	base	3.3	3	6.83761
RI	181	205	base	3.3	3	3.78788
RI	181	212	base	3.3	3	3.9604
RI	181	213	base	3.3	3	4.2735
RI	181	170	base	6.9	3	5.88235
RI	181	172	base	6.9	3	3.73134
RI	181	173	base	6.9	3	10
RI	181	178	base	6.9	3	3.7037
RI	181	184	base	6.9	3	4.51128
RI	181	185	base	6.9	3	9.48905
RI	181	188	base	6.9	3	6.72269
RI	181	192	base	6.9	3	5.08475
RI	181	193	base	6.9	3	7.69231
RI	181	198	base	6.9	3	5.7971
RI	181	200	base	6.9	3	8.40336
RI	181	205	base	6.9	3	10.5634
RI	181	212	base	6.9	3	9.34579
RI	181	213	base	6.9	3	11.811
BI	188	104	base	0	1	1.75439
BI	188	105	base	0	1	0.819672
BI	188	106	base	0	1	0.78125
BI	188	107	base	0	1	0.813008
BI	188	118	base	0	1	0
BI	188	119	base	0	1	0.819672
BI	188	124	base	0	1	1.62602
BI	188	139	base	0	1	1.5625
BI	188	148	base	0	1	1.66667
BI	188	155	base	0	1	0
BI	188	156	base	0	1	1.62602
BI	188	168	base	0	1	0.826446
BI	188	174	base	0	1	1.62602
BI	188	175	base	0	1	0.826446
BI	188	184	base	0	1	0
BI	188	190	base	0	1	0.819672
BI	188	195	base	0	1	0.819672
BI	188	196	base	0	1	0.8
BI	188	197	base	0	1	0.840336
BI	188	198	base	0	1	0
BI	188	203	base	0	1	1.65289
BI	188	204	base	0	1	0
BI	188	210	base	0	1	0.970874
BI	188	211	base	0	1	0
BI	188	216	base	0	1	2.17391
BI	188	104	base	3.3	1	5.17241
BI	188	105	base	3.3	1	3.22581
BI	188	106	base	3.3	1	3.78788
BI	188	107	base	3.3	1	0.813008
BI	188	118	base	3.3	1	3.22581
BI	188	119	base	3.3	1	5.46875
BI	188	124	base	3.3	1	3.96825
BI	188	139	base	3.3	1	3.81679
BI	188	148	base	3.3	1	3.25203
BI	188	155	base	3.3	1	4.83871
BI	188	156	base	3.3	1	6.20155
BI	188	168	base	3.3	1	6.29921
BI	188	174	base	3.3	1	3.1746
BI	188	175	base	3.3	1	5.51181
BI	188	184	base	3.3	1	4.72441
BI	188	190	base	3.3	1	3.2
BI	188	195	base	3.3	1	2.43902
BI	188	196	base	3.3	1	3.87597
BI	188	197	base	3.3	1	2.47934
BI	188	198	base	3.3	1	4.95868
BI	188	203	base	3.3	1	4.03226
BI	188	204	base	3.3	1	4.72441
BI	188	210	base	3.3	1	11.4035
BI	188	211	base	3.3	1	4.20168
BI	188	216	base	3.3	1	4.21053
BI	188	104	base	6.9	1	6.66667
BI	188	105	base	6.9	1	10.4478
BI	188	106	base	6.9	1	0.78125
BI	188	107	base	6.9	1	1.6129
BI	188	118	base	6.9	1	5.51181
BI	188	119	base	6.9	1	4.7619
BI	188	124	base	6.9	1	3.93701
BI	188	139	base	6.9	1	8.08824
BI	188	148	base	6.9	1	13.2353
BI	188	155	base	6.9	1	8.46154
BI	188	156	base	6.9	1	8.33333
BI	188	168	base	6.9	1	8.39695
BI	188	174	base	6.9	1	10.3704
BI	188	175	base	6.9	1	9.09091
BI	188	184	base	6.9	1	9.02256
BI	188	190	base	6.9	1	7.63359
BI	188	195	base	6.9	1	10.4478
BI	188	196	base	6.9	1	11.5108
BI	188	197	base	6.9	1	7.03125
BI	188	198	base	6.9	1	16.6667
BI	188	203	base	6.9	1	9.84848
BI	188	204	base	6.9	1	8.33333
BI	188	210	base	6.9	1	15.1261
BI	188	211	base	6.9	1	10.2362
BI	188	216	base	6.9	1	14.2857
BI	188	104	base	0	4	1.75439
BI	188	105	base	0	4	0
BI	188	106	base	0	4	0
BI	188	107	base	0	4	0.813008
BI	188	118	base	0	4	0.819672
BI	188	119	base	0	4	0.819672
BI	188	124	base	0	4	0
BI	188	139	base	0	4	0.793651
BI	188	148	base	0	4	2.47934
BI	188	155	base	0	4	0
BI	188	156	base	0	4	0.826446
BI	188	168	base	0	4	0.819672
BI	188	174	base	0	4	0
BI	188	175	base	0	4	0
BI	188	184	base	0	4	0
BI	188	190	base	0	4	0.819672
BI	188	195	base	0	4	0.833333
BI	188	196	base	0	4	0
BI	188	197	base	0	4	0
BI	188	198	base	0	4	0
BI	188	203	base	0	4	0
BI	188	204	base	0	4	0
BI	188	210	base	0	4	0.980392
BI	188	211	base	0	4	0
BI	188	216	base	0	4	0
BI	188	104	base	3.3	4	4.2735
BI	188	105	base	3.3	4	0.826446
BI	188	106	base	3.3	4	0.78125
BI	188	107	base	3.3	4	0
BI	188	118	base	3.3	4	0.826446
BI	188	119	base	3.3	4	0.826446
BI	188	124	base	3.3	4	0
BI	188	139	base	3.3	4	2.32558
BI	188	148	base	3.3	4	0
BI	188	155	base	3.3	4	1.63934
BI	188	156	base	3.3	4	4.72441
BI	188	168	base	3.3	4	0.826446
BI	188	174	base	3.3	4	1.63934
BI	188	175	base	3.3	4	4
BI	188	184	base	3.3	4	1.62602
BI	188	190	base	3.3	4	0.819672
BI	188	195	base	3.3	4	0.833333
BI	188	196	base	3.3	4	1.5873
BI	188	197	base	3.3	4	3.25203
BI	188	198	base	3.3	4	3.38983
BI	188	203	base	3.3	4	3.22581
BI	188	204	base	3.3	4	2.41935
BI	188	210	base	3.3	4	4.71698
BI	188	211	base	3.3	4	2.5641
BI	188	216	base	3.3	4	1.08696
BI	188	104	base	6.9	4	5.88235
BI	188	105	base	6.9	4	0.826446
BI	188	106	base	6.9	4	2.32558
BI	188	107	base	6.9	4	1.6129
BI	188	118	base	6.9	4	0.826446
BI	188	119	base	6.9	4	1.62602
BI	188	124	base	6.9	4	1.62602
BI	188	139	base	6.9	4	3.10078
BI	188	148	base	6.9	4	7.03125
BI	188	155	base	6.9	4	6.97674
BI	188	156	base	6.9	4	0.819672
BI	188	168	base	6.9	4	1.63934
BI	188	174	base	6.9	4	3.1746
BI	188	175	base	6.9	4	2.43902
BI	188	184	base	6.9	4	2.43902
BI	188	190	base	6.9	4	4
BI	188	195	base	6.9	4	0.819672
BI	188	196	base	6.9	4	3.125
BI	188	197	base	6.9	4	4.06504
BI	188	198	base	6.9	4	6.50407
BI	188	203	base	6.9	4	4.03226
BI	188	204	base	6.9	4	5.46875
BI	188	210	base	6.9	4	2.85714
BI	188	211	base	6.9	4	2.54237
BI	188	216	base	6.9	4	4.25532
