# Supplementary material for: Single caudate neurons encode temporally discounted value for formulating motivation for action
Source: eLife. 2021 Jul 30;10:e61248. doi: 10.7554/eLife.61248 (PMC8352586; doi:10.7554/eLife.61248)
Supplement: Figure 8—source data 1. [file elife-61248-fig8-data1.xls]

## Sheet: B
monkey_name	ID	Session	condition	reward	error_rate
ST	163	1	con	1	10.26
ST	163	1	con	2	3.82
ST	163	1	con	4	1.25
ST	163	1	con	8	0.96
ST	163	2	con	1	9.04
ST	163	2	con	2	2.95
ST	163	2	con	4	1.24
ST	163	2	con	8	0.64
ST	163	3	con	1	6.94
ST	163	3	con	2	3.73
ST	163	3	con	4	1.31
ST	163	3	con	8	0
ST	163	4	con	1	10
ST	163	4	con	2	6.34
ST	163	4	con	4	0.93
ST	163	4	con	8	0.92
ST	163	5	con	1	3.6
ST	163	5	con	2	3.98
ST	163	5	con	4	1.49
ST	163	5	con	8	0.32
ST	163	6	inactivate	1	9.85
ST	163	6	inactivate	2	6.41
ST	163	6	inactivate	4	2.27
ST	163	6	inactivate	8	1.67
ST	163	7	inactivate	1	15.89
ST	163	7	inactivate	2	8.75
ST	163	7	inactivate	4	2.66
ST	163	7	inactivate	8	3.16
ST	163	8	inactivate	1	9.14
ST	163	8	inactivate	2	5.5
ST	163	8	inactivate	4	1.2
ST	163	8	inactivate	8	2.12
ST	163	9	inactivate	1	8.22
ST	163	9	inactivate	2	8.36
ST	163	9	inactivate	4	1.8
ST	163	9	inactivate	8	1.51
ST	163	10	inactivate	1	10.4
ST	163	10	inactivate	2	7.86
ST	163	10	inactivate	4	1.35
ST	163	10	inactivate	8	3.1
RI	181	11	con	1	9.76
RI	181	11	con	2	6.25
RI	181	11	con	4	4.55
RI	181	11	con	8	4.1
RI	181	12	con	1	16.55
RI	181	12	con	2	8.49
RI	181	12	con	4	2.48
RI	181	12	con	8	6.45
RI	181	13	con	1	7.78
RI	181	13	con	2	1.75
RI	181	13	con	4	2.9
RI	181	13	con	8	1.19
RI	181	14	con	1	9.97
RI	181	14	con	2	3.91
RI	181	14	con	4	1.37
RI	181	14	con	8	0.36
RI	181	15	inactivate	1	6.25
RI	181	15	inactivate	2	4.26
RI	181	15	inactivate	4	3.83
RI	181	15	inactivate	8	2.61
RI	181	16	inactivate	1	11.26
RI	181	16	inactivate	2	6.05
RI	181	16	inactivate	4	4.01
RI	181	16	inactivate	8	6.71
RI	181	17	inactivate	1	4.49
RI	181	17	inactivate	2	3.72
RI	181	17	inactivate	4	0.44
RI	181	17	inactivate	8	1.74
RI	181	18	inactivate	1	14.29
RI	181	18	inactivate	2	5.52
RI	181	18	inactivate	4	3.37
RI	181	18	inactivate	8	6.9
ST	163	496	base	1	9.4
ST	163	497	base	1	3.34
ST	163	498	base	1	5.9
ST	163	499	base	1	5.48
ST	163	500	base	1	6.1
ST	163	503	base	1	8.84
ST	163	504	base	1	6.76
ST	163	511	base	1	6.67
ST	163	512	base	1	8
ST	163	513	base	1	9.32
ST	163	514	base	1	6.71
ST	163	518	base	1	5.13
ST	163	520	base	1	6.1
ST	163	525	base	1	7.23
ST	163	527	base	1	6.78
ST	163	534	base	1	8.14
ST	163	539	base	1	7.08
ST	163	541	base	1	5.88
ST	163	548	base	1	6.08
RI	181	12	base	1	15.38
RI	181	24	base	1	9.76
RI	181	32	base	1	16.55
RI	181	38	base	1	15.31
RI	181	39	base	1	12.9
RI	181	44	base	1	14.71
RI	181	47	base	1	11.05
RI	181	73	base	1	16.62
RI	181	74	base	1	12.57
RI	181	79	base	1	11.9
RI	181	80	base	1	14.76
RI	181	81	base	1	15.16
RI	181	87	base	1	9.33
RI	181	95	base	1	7.78
RI	181	96	base	1	49.02
RI	181	103	base	1	9.97
ST	163	496	base	2	4.5
ST	163	497	base	2	1.14
ST	163	498	base	2	3.93
ST	163	499	base	2	0.88
ST	163	500	base	2	3.95
ST	163	503	base	2	3.19
ST	163	504	base	2	3.77
ST	163	511	base	2	3.72
ST	163	512	base	2	2.48
ST	163	513	base	2	1.81
ST	163	514	base	2	4.25
ST	163	518	base	2	3.52
ST	163	520	base	2	3.46
ST	163	525	base	2	4.36
ST	163	527	base	2	3.59
ST	163	534	base	2	7.1
ST	163	539	base	2	3.44
ST	163	541	base	2	2.95
ST	163	548	base	2	3.24
RI	181	12	base	2	5.96
RI	181	24	base	2	6.25
RI	181	32	base	2	8.49
RI	181	38	base	2	8.68
RI	181	39	base	2	9.49
RI	181	44	base	2	9.4
RI	181	47	base	2	6.67
RI	181	73	base	2	8.86
RI	181	74	base	2	3.47
RI	181	79	base	2	11.98
RI	181	80	base	2	9.65
RI	181	81	base	2	7.26
RI	181	87	base	2	6.1
RI	181	95	base	2	1.75
RI	181	96	base	2	40.78
RI	181	103	base	2	3.91
ST	163	496	base	4	3.06
ST	163	497	base	4	1.38
ST	163	498	base	4	1.79
ST	163	499	base	4	0.6
ST	163	500	base	4	0.31
ST	163	503	base	4	1.83
ST	163	504	base	4	0.58
ST	163	511	base	4	2.76
ST	163	512	base	4	3.07
ST	163	513	base	4	1.24
ST	163	514	base	4	2.73
ST	163	518	base	4	0
ST	163	520	base	4	1.55
ST	163	525	base	4	1.29
ST	163	527	base	4	1.21
ST	163	534	base	4	0.7
ST	163	539	base	4	1.32
ST	163	541	base	4	0
ST	163	548	base	4	2.13
RI	181	12	base	4	7.1
RI	181	24	base	4	4.55
RI	181	32	base	4	2.48
RI	181	38	base	4	3.5
RI	181	39	base	4	2.58
RI	181	44	base	4	2.67
RI	181	47	base	4	4.55
RI	181	73	base	4	5.71
RI	181	74	base	4	4.79
RI	181	79	base	4	4.52
RI	181	80	base	4	4.71
RI	181	81	base	4	7.11
RI	181	87	base	4	4.04
RI	181	95	base	4	2.9
RI	181	96	base	4	33.44
RI	181	103	base	4	1.37
ST	163	496	base	8	2.74
ST	163	497	base	8	0.28
ST	163	498	base	8	1.2
ST	163	499	base	8	0.91
ST	163	500	base	8	2.11
ST	163	503	base	8	1.45
ST	163	504	base	8	0.32
ST	163	511	base	8	0
ST	163	512	base	8	0.63
ST	163	513	base	8	0.87
ST	163	514	base	8	1.64
ST	163	518	base	8	0.44
ST	163	520	base	8	0.32
ST	163	525	base	8	1.3
ST	163	527	base	8	0.58
ST	163	534	base	8	0.36
ST	163	539	base	8	0.33
ST	163	541	base	8	1.63
ST	163	548	base	8	1.85
RI	181	12	base	8	1.68
RI	181	24	base	8	4.1
RI	181	32	base	8	6.45
RI	181	38	base	8	6.06
RI	181	39	base	8	3.25
RI	181	44	base	8	1.23
RI	181	47	base	8	3.28
RI	181	73	base	8	4.62
RI	181	74	base	8	1.26
RI	181	79	base	8	3.64
RI	181	80	base	8	4.1
RI	181	81	base	8	4.84
RI	181	87	base	8	5.84
RI	181	95	base	8	1.19
RI	181	96	base	8	34.16
RI	181	103	base	8	0.36

## Sheet: C-D
monkey_name	ID	Session	condition	phase	reward	error_rate
ST	163	497	base	0.25	1	0
ST	163	497	base	0.25	2	0
ST	163	497	base	0.25	4	1.04
ST	163	497	base	0.25	8	0
ST	163	497	base	0.5	1	2.17
ST	163	497	base	0.5	2	0.94
ST	163	497	base	0.5	4	2.67
ST	163	497	base	0.5	8	0
ST	163	497	base	0.75	1	1.98
ST	163	497	base	0.75	2	2.35
ST	163	497	base	0.75	4	1
ST	163	497	base	0.75	8	0
ST	163	497	base	1	1	11.59
ST	163	497	base	1	2	1.28
ST	163	497	base	1	4	1.15
ST	163	497	base	1	8	1.05
ST	163	498	base	0.25	1	1.15
ST	163	498	base	0.25	2	4.35
ST	163	498	base	0.25	4	0
ST	163	498	base	0.25	8	0
ST	163	498	base	0.5	1	3.53
ST	163	498	base	0.5	2	4.05
ST	163	498	base	0.5	4	2.08
ST	163	498	base	0.5	8	1.28
ST	163	498	base	0.75	1	9.21
ST	163	498	base	0.75	2	3.66
ST	163	498	base	0.75	4	1.37
ST	163	498	base	0.75	8	1.12
ST	163	498	base	1	1	12.64
ST	163	498	base	1	2	4.26
ST	163	498	base	1	4	3.8
ST	163	498	base	1	8	3.7
ST	163	499	base	0.25	1	1.25
ST	163	499	base	0.25	2	0
ST	163	499	base	0.25	4	0
ST	163	499	base	0.25	8	1.25
ST	163	499	base	0.5	1	2.3
ST	163	499	base	0.5	2	0
ST	163	499	base	0.5	4	1.16
ST	163	499	base	0.5	8	2.53
ST	163	499	base	0.75	1	7.59
ST	163	499	base	0.75	2	0
ST	163	499	base	0.75	4	0
ST	163	499	base	0.75	8	0
ST	163	499	base	1	1	12.2
ST	163	499	base	1	2	3.33
ST	163	499	base	1	4	1.2
ST	163	499	base	1	8	0
ST	163	500	base	0.25	1	3.95
ST	163	500	base	0.25	2	0
ST	163	500	base	0.25	4	0
ST	163	500	base	0.25	8	1.19
ST	163	500	base	0.5	1	5.88
ST	163	500	base	0.5	2	2.33
ST	163	500	base	0.5	4	0
ST	163	500	base	0.5	8	1.39
ST	163	500	base	0.75	1	7.23
ST	163	500	base	0.75	2	4.55
ST	163	500	base	0.75	4	0
ST	163	500	base	0.75	8	3.45
ST	163	500	base	1	1	8.86
ST	163	500	base	1	2	14.08
ST	163	500	base	1	4	2.38
ST	163	500	base	1	8	2.47
ST	163	504	base	0.25	1	0.99
ST	163	504	base	0.25	2	1.09
ST	163	504	base	0.25	4	0
ST	163	504	base	0.25	8	0
ST	163	504	base	0.5	1	10
ST	163	504	base	0.5	2	0
ST	163	504	base	0.5	4	0
ST	163	504	base	0.5	8	0
ST	163	504	base	0.75	1	6.35
ST	163	504	base	0.75	2	6.33
ST	163	504	base	0.75	4	2.99
ST	163	504	base	0.75	8	1.1
ST	163	504	base	1	1	12.87
ST	163	504	base	1	2	8.05
ST	163	504	base	1	4	0
ST	163	504	base	1	8	0
ST	163	512	base	0.25	1	1.1
ST	163	512	base	0.25	2	0
ST	163	512	base	0.25	4	0
ST	163	512	base	0.25	8	0
ST	163	512	base	0.5	1	2.7
ST	163	512	base	0.5	2	1.35
ST	163	512	base	0.5	4	0
ST	163	512	base	0.5	8	1.27
ST	163	512	base	0.75	1	8.33
ST	163	512	base	0.75	2	1.15
ST	163	512	base	0.75	4	1.35
ST	163	512	base	0.75	8	1.25
ST	163	512	base	1	1	22.35
ST	163	512	base	1	2	7.69
ST	163	512	base	1	4	10.98
ST	163	512	base	1	8	0
ST	163	513	base	0.25	1	0
ST	163	513	base	0.25	2	3.9
ST	163	513	base	0.25	4	0
ST	163	513	base	0.25	8	1.09
ST	163	513	base	0.5	1	6.25
ST	163	513	base	0.5	2	0
ST	163	513	base	0.5	4	0
ST	163	513	base	0.5	8	0
ST	163	513	base	0.75	1	23.61
ST	163	513	base	0.75	2	0
ST	163	513	base	0.75	4	2.22
ST	163	513	base	0.75	8	1.22
ST	163	513	base	1	1	13.41
ST	163	513	base	1	2	5.26
ST	163	513	base	1	4	4.29
ST	163	513	base	1	8	1.1
ST	163	514	base	0.25	1	3.33
ST	163	514	base	0.25	2	2.41
ST	163	514	base	0.25	4	0
ST	163	514	base	0.25	8	1.35
ST	163	514	base	0.5	1	5.63
ST	163	514	base	0.5	2	1.39
ST	163	514	base	0.5	4	6.76
ST	163	514	base	0.5	8	1.33
ST	163	514	base	0.75	1	13.85
ST	163	514	base	0.75	2	11.11
ST	163	514	base	0.75	4	1.32
ST	163	514	base	0.75	8	3.95
ST	163	514	base	1	1	8.75
ST	163	514	base	1	2	4
ST	163	514	base	1	4	2.9
ST	163	514	base	1	8	0
ST	163	519	control	0.25	1	2.56
ST	163	519	control	0.25	2	0
ST	163	519	control	0.25	4	0
ST	163	519	control	0.25	8	0
ST	163	519	control	0.5	1	13.16
ST	163	519	control	0.5	2	2.5
ST	163	519	control	0.5	4	1.47
ST	163	519	control	0.5	8	1.19
ST	163	519	control	0.75	1	13.16
ST	163	519	control	0.75	2	0
ST	163	519	control	0.75	4	0
ST	163	519	control	0.75	8	0
ST	163	519	control	1	1	17.28
ST	163	519	control	1	2	12.82
ST	163	519	control	1	4	3.49
ST	163	519	control	1	8	2.7
ST	163	520	base	0.25	1	0
ST	163	520	base	0.25	2	0
ST	163	520	base	0.25	4	1.14
ST	163	520	base	0.25	8	0
ST	163	520	base	0.5	1	2.67
ST	163	520	base	0.5	2	0
ST	163	520	base	0.5	4	1.56
ST	163	520	base	0.5	8	0
ST	163	520	base	0.75	1	7.69
ST	163	520	base	0.75	2	8.33
ST	163	520	base	0.75	4	1.25
ST	163	520	base	0.75	8	0
ST	163	520	base	1	1	16.46
ST	163	520	base	1	2	5.63
ST	163	520	base	1	4	2.33
ST	163	520	base	1	8	1.33
ST	163	521	inactivate	0.25	1	6.85
ST	163	521	inactivate	0.25	2	13.51
ST	163	521	inactivate	0.25	4	7.14
ST	163	521	inactivate	0.25	8	8.33
ST	163	521	inactivate	0.5	1	4
ST	163	521	inactivate	0.5	2	2.44
ST	163	521	inactivate	0.5	4	0
ST	163	521	inactivate	0.5	8	0
ST	163	521	inactivate	0.75	1	22.5
ST	163	521	inactivate	0.75	2	9.09
ST	163	521	inactivate	0.75	4	1.59
ST	163	521	inactivate	0.75	8	0
ST	163	521	inactivate	1	1	8.45
ST	163	521	inactivate	1	2	4.76
ST	163	521	inactivate	1	4	1.14
ST	163	521	inactivate	1	8	1.39
ST	163	525	base	0.25	1	0
ST	163	525	base	0.25	2	0
ST	163	525	base	0.25	4	0
ST	163	525	base	0.25	8	0
ST	163	525	base	0.5	1	2.56
ST	163	525	base	0.5	2	12.33
ST	163	525	base	0.5	4	1.33
ST	163	525	base	0.5	8	2.56
ST	163	525	base	0.75	1	10.53
ST	163	525	base	0.75	2	2.7
ST	163	525	base	0.75	4	1.35
ST	163	525	base	0.75	8	0
ST	163	525	base	1	1	21.43
ST	163	525	base	1	2	6.33
ST	163	525	base	1	4	2.53
ST	163	525	base	1	8	2.7
ST	163	526	control	0.25	1	3.9
ST	163	526	control	0.25	2	1.39
ST	163	526	control	0.25	4	1.16
ST	163	526	control	0.25	8	0
ST	163	526	control	0.5	1	6.74
ST	163	526	control	0.5	2	4.17
ST	163	526	control	0.5	4	1.16
ST	163	526	control	0.5	8	0
ST	163	526	control	0.75	1	8.57
ST	163	526	control	0.75	2	1.47
ST	163	526	control	0.75	4	1.59
ST	163	526	control	0.75	8	0
ST	163	526	control	1	1	20.25
ST	163	526	control	1	2	6.25
ST	163	526	control	1	4	1.15
ST	163	526	control	1	8	2.6
ST	163	527	base	0.25	1	0
ST	163	527	base	0.25	2	1.39
ST	163	527	base	0.25	4	0
ST	163	527	base	0.25	8	0
ST	163	527	base	0.5	1	2.5
ST	163	527	base	0.5	2	1.2
ST	163	527	base	0.5	4	0
ST	163	527	base	0.5	8	0
ST	163	527	base	0.75	1	7.78
ST	163	527	base	0.75	2	6.25
ST	163	527	base	0.75	4	0
ST	163	527	base	0.75	8	4
ST	163	527	base	1	1	18.75
ST	163	527	base	1	2	5.63
ST	163	527	base	1	4	5.19
ST	163	527	base	1	8	0
ST	163	533	control	0.25	1	1.45
ST	163	533	control	0.25	2	1.05
ST	163	533	control	0.25	4	0
ST	163	533	control	0.25	8	0
ST	163	533	control	0.5	1	11.25
ST	163	533	control	0.5	2	2.44
ST	163	533	control	0.5	4	0
ST	163	533	control	0.5	8	0
ST	163	533	control	0.75	1	12.66
ST	163	533	control	0.75	2	5
ST	163	533	control	0.75	4	0
ST	163	533	control	0.75	8	0
ST	163	533	control	1	1	4.35
ST	163	533	control	1	2	7.69
ST	163	533	control	1	4	5.13
ST	163	533	control	1	8	0
ST	163	534	base	0.25	1	7.69
ST	163	534	base	0.25	2	7.79
ST	163	534	base	0.25	4	0
ST	163	534	base	0.25	8	0
ST	163	534	base	0.5	1	6.15
ST	163	534	base	0.5	2	4.76
ST	163	534	base	0.5	4	0
ST	163	534	base	0.5	8	1.37
ST	163	534	base	0.75	1	9.33
ST	163	534	base	0.75	2	8.33
ST	163	534	base	0.75	4	2.78
ST	163	534	base	0.75	8	0
ST	163	534	base	1	1	11.69
ST	163	534	base	1	2	10.53
ST	163	534	base	1	4	0
ST	163	534	base	1	8	0
ST	163	535	inactivate	0.25	1	5.88
ST	163	535	inactivate	0.25	2	6.06
ST	163	535	inactivate	0.25	4	1.16
ST	163	535	inactivate	0.25	8	4.76
ST	163	535	inactivate	0.5	1	3.57
ST	163	535	inactivate	0.5	2	0
ST	163	535	inactivate	0.5	4	1.22
ST	163	535	inactivate	0.5	8	2.41
ST	163	535	inactivate	0.75	1	14.47
ST	163	535	inactivate	0.75	2	9
ST	163	535	inactivate	0.75	4	2.6
ST	163	535	inactivate	0.75	8	0
ST	163	535	inactivate	1	1	15.91
ST	163	535	inactivate	1	2	7.35
ST	163	535	inactivate	1	4	0
ST	163	535	inactivate	1	8	3.75
ST	163	539	base	0.25	1	0
ST	163	539	base	0.25	2	0
ST	163	539	base	0.25	4	0
ST	163	539	base	0.25	8	0
ST	163	539	base	0.5	1	5.62
ST	163	539	base	0.5	2	2.9
ST	163	539	base	0.5	4	0
ST	163	539	base	0.5	8	0
ST	163	539	base	0.75	1	8.82
ST	163	539	base	0.75	2	5.33
ST	163	539	base	0.75	4	1.16
ST	163	539	base	0.75	8	1.41
ST	163	539	base	1	1	19.44
ST	163	539	base	1	2	5.81
ST	163	539	base	1	4	5.33
ST	163	539	base	1	8	0
ST	163	540	control	0.25	1	4.76
ST	163	540	control	0.25	2	5.13
ST	163	540	control	0.25	4	1.27
ST	163	540	control	0.25	8	0
ST	163	540	control	0.5	1	13.64
ST	163	540	control	0.5	2	2.5
ST	163	540	control	0.5	4	0
ST	163	540	control	0.5	8	0
ST	163	540	control	0.75	1	10.99
ST	163	540	control	0.75	2	8.14
ST	163	540	control	0.75	4	2.38
ST	163	540	control	0.75	8	1.3
ST	163	540	control	1	1	12.86
ST	163	540	control	1	2	12.5
ST	163	540	control	1	4	0
ST	163	540	control	1	8	2.3
ST	163	541	base	0.25	1	1.35
ST	163	541	base	0.25	2	2.86
ST	163	541	base	0.25	4	0
ST	163	541	base	0.25	8	1.33
ST	163	541	base	0.5	1	2.33
ST	163	541	base	0.5	2	3.66
ST	163	541	base	0.5	4	0
ST	163	541	base	0.5	8	1.35
ST	163	541	base	0.75	1	11.27
ST	163	541	base	0.75	2	3.53
ST	163	541	base	0.75	4	0
ST	163	541	base	0.75	8	1.37
ST	163	541	base	1	1	10.96
ST	163	541	base	1	2	3.39
ST	163	541	base	1	4	0
ST	163	541	base	1	8	2.5
ST	163	542	inactivate	0.25	1	6.9
ST	163	542	inactivate	0.25	2	0
ST	163	542	inactivate	0.25	4	2.33
ST	163	542	inactivate	0.25	8	1.23
ST	163	542	inactivate	0.5	1	2.6
ST	163	542	inactivate	0.5	2	3.66
ST	163	542	inactivate	0.5	4	0
ST	163	542	inactivate	0.5	8	2.33
ST	163	542	inactivate	0.75	1	9.3
ST	163	542	inactivate	0.75	2	14.81
ST	163	542	inactivate	0.75	4	1.2
ST	163	542	inactivate	0.75	8	1.2
ST	163	542	inactivate	1	1	16.28
ST	163	542	inactivate	1	2	17.24
ST	163	542	inactivate	1	4	4.71
ST	163	542	inactivate	1	8	1.23
ST	163	548	base	0.25	1	1.41
ST	163	548	base	0.25	2	0
ST	163	548	base	0.25	4	1.18
ST	163	548	base	0.25	8	0
ST	163	548	base	0.5	1	6.02
ST	163	548	base	0.5	2	1.28
ST	163	548	base	0.5	4	0
ST	163	548	base	0.5	8	0
ST	163	548	base	0.75	1	8.33
ST	163	548	base	0.75	2	8
ST	163	548	base	0.75	4	4.05
ST	163	548	base	0.75	8	5.95
ST	163	548	base	1	1	9.86
ST	163	548	base	1	2	4.4
ST	163	548	base	1	4	3.61
ST	163	548	base	1	8	1.3
ST	163	549	inactivate	0.25	1	13.95
ST	163	549	inactivate	0.25	2	6.15
ST	163	549	inactivate	0.25	4	2.82
ST	163	549	inactivate	0.25	8	6.02
ST	163	549	inactivate	0.5	1	3.95
ST	163	549	inactivate	0.5	2	4.4
ST	163	549	inactivate	0.5	4	1.41
ST	163	549	inactivate	0.5	8	0
ST	163	549	inactivate	0.75	1	12.5
ST	163	549	inactivate	0.75	2	5.26
ST	163	549	inactivate	0.75	4	0
ST	163	549	inactivate	0.75	8	2.74
ST	163	549	inactivate	1	1	14.81
ST	163	549	inactivate	1	2	19.4
ST	163	549	inactivate	1	4	1.43
ST	163	549	inactivate	1	8	3.61
RI	181	22	inactivate	0.25	1	4.29
RI	181	22	inactivate	0.25	2	0
RI	181	22	inactivate	0.25	4	1.32
RI	181	22	inactivate	0.25	8	0
RI	181	22	inactivate	0.5	1	1.33
RI	181	22	inactivate	0.5	2	5.45
RI	181	22	inactivate	0.5	4	2.78
RI	181	22	inactivate	0.5	8	2.5
RI	181	22	inactivate	0.75	1	5.88
RI	181	22	inactivate	0.75	2	5.49
RI	181	22	inactivate	0.75	4	2.53
RI	181	22	inactivate	0.75	8	7.35
RI	181	22	inactivate	1	1	20
RI	181	22	inactivate	1	2	8.7
RI	181	22	inactivate	1	4	12.16
RI	181	22	inactivate	1	8	2.63
RI	181	24	control	0.25	1	0
RI	181	24	control	0.25	2	0
RI	181	24	control	0.25	4	1.47
RI	181	24	control	0.25	8	0
RI	181	24	control	0.5	1	2.86
RI	181	24	control	0.5	2	1.72
RI	181	24	control	0.5	4	0
RI	181	24	control	0.5	8	1.33
RI	181	24	control	0.75	1	6.67
RI	181	24	control	0.75	2	5.88
RI	181	24	control	0.75	4	5.71
RI	181	24	control	0.75	8	2.86
RI	181	24	control	1	1	32.43
RI	181	24	control	1	2	17.5
RI	181	24	control	1	4	12.68
RI	181	24	control	1	8	21.88
RI	181	26	inactivate	0.25	1	1.64
RI	181	26	inactivate	0.25	2	1.59
RI	181	26	inactivate	0.25	4	1.69
RI	181	26	inactivate	0.25	8	0
RI	181	26	inactivate	0.5	1	7.69
RI	181	26	inactivate	0.5	2	3.39
RI	181	26	inactivate	0.5	4	0
RI	181	26	inactivate	0.5	8	4.23
RI	181	26	inactivate	0.75	1	8.06
RI	181	26	inactivate	0.75	2	5
RI	181	26	inactivate	0.75	4	7.89
RI	181	26	inactivate	0.75	8	5.17
RI	181	26	inactivate	1	1	31.94
RI	181	26	inactivate	1	2	17.74
RI	181	26	inactivate	1	4	7.25
RI	181	26	inactivate	1	8	21.88
RI	181	32	control	0.25	1	4.08
RI	181	32	control	0.25	2	1.89
RI	181	32	control	0.25	4	1.82
RI	181	32	control	0.25	8	1.59
RI	181	32	control	0.5	1	4.48
RI	181	32	control	0.5	2	7.58
RI	181	32	control	0.5	4	3.23
RI	181	32	control	0.5	8	0
RI	181	32	control	0.75	1	19.67
RI	181	32	control	0.75	2	9.38
RI	181	32	control	0.75	4	0
RI	181	32	control	0.75	8	2.04
RI	181	32	control	1	1	72.73
RI	181	32	control	1	2	33.33
RI	181	32	control	1	4	6.67
RI	181	32	control	1	8	24.24
RI	181	38	base	0.25	1	4.88
RI	181	38	base	0.25	2	1.64
RI	181	38	base	0.25	4	0
RI	181	38	base	0.25	8	0
RI	181	38	base	0.5	1	12.77
RI	181	38	base	0.5	2	1.72
RI	181	38	base	0.5	4	0
RI	181	38	base	0.5	8	1.49
RI	181	38	base	0.75	1	24.32
RI	181	38	base	0.75	2	16.07
RI	181	38	base	0.75	4	10.34
RI	181	38	base	0.75	8	9.38
RI	181	38	base	1	1	47.83
RI	181	38	base	1	2	22.39
RI	181	38	base	1	4	6.9
RI	181	38	base	1	8	20.31
RI	181	39	base	0.25	1	6.35
RI	181	39	base	0.25	2	0
RI	181	39	base	0.25	4	0
RI	181	39	base	0.25	8	0
RI	181	39	base	0.5	1	10.39
RI	181	39	base	0.5	2	1.75
RI	181	39	base	0.5	4	1.67
RI	181	39	base	0.5	8	0
RI	181	39	base	0.75	1	16.39
RI	181	39	base	0.75	2	25.42
RI	181	39	base	0.75	4	5.88
RI	181	39	base	0.75	8	7.25
RI	181	39	base	1	1	31.88
RI	181	39	base	1	2	22.5
RI	181	39	base	1	4	5.26
RI	181	39	base	1	8	10.34
RI	181	44	base	0.25	1	0
RI	181	44	base	0.25	2	6.45
RI	181	44	base	0.25	4	0
RI	181	44	base	0.25	8	0
RI	181	44	base	0.5	1	5.88
RI	181	44	base	0.5	2	2.94
RI	181	44	base	0.5	4	0
RI	181	44	base	0.5	8	2.78
RI	181	44	base	0.75	1	20.83
RI	181	44	base	0.75	2	9.76
RI	181	44	base	0.75	4	5.26
RI	181	44	base	0.75	8	2.78
RI	181	44	base	1	1	44.74
RI	181	44	base	1	2	27.59
RI	181	44	base	1	4	8.82
RI	181	44	base	1	8	2.38
RI	181	47	base	0.25	1	6.67
RI	181	47	base	0.25	2	7.79
RI	181	47	base	0.25	4	5.13
RI	181	47	base	0.25	8	5.71
RI	181	47	base	0.5	1	11.11
RI	181	47	base	0.5	2	5.63
RI	181	47	base	0.5	4	2.9
RI	181	47	base	0.5	8	1.28
RI	181	47	base	0.75	1	29.69
RI	181	47	base	0.75	2	7.79
RI	181	47	base	0.75	4	9.86
RI	181	47	base	0.75	8	12.99
RI	181	47	base	1	1	11.25
RI	181	47	base	1	2	9.64
RI	181	47	base	1	4	2.63
RI	181	47	base	1	8	0
RI	181	73	base	0.25	1	3.39
RI	181	73	base	0.25	2	0
RI	181	73	base	0.25	4	0
RI	181	73	base	0.25	8	0
RI	181	73	base	0.5	1	2.63
RI	181	73	base	0.5	2	1.54
RI	181	73	base	0.5	4	0
RI	181	73	base	0.5	8	1.35
RI	181	73	base	0.75	1	12.12
RI	181	73	base	0.75	2	7.23
RI	181	73	base	0.75	4	9.09
RI	181	73	base	0.75	8	0
RI	181	73	base	1	1	56.47
RI	181	73	base	1	2	38.03
RI	181	73	base	1	4	17.33
RI	181	73	base	1	8	21.43
RI	181	74	base	0.25	1	2.94
RI	181	74	base	0.25	2	5.26
RI	181	74	base	0.25	4	0
RI	181	74	base	0.25	8	0
RI	181	74	base	0.5	1	4.76
RI	181	74	base	0.5	2	0
RI	181	74	base	0.5	4	0
RI	181	74	base	0.5	8	0
RI	181	74	base	0.75	1	15.38
RI	181	74	base	0.75	2	2.27
RI	181	74	base	0.75	4	2.86
RI	181	74	base	0.75	8	0
RI	181	74	base	1	1	48.39
RI	181	74	base	1	2	11.43
RI	181	74	base	1	4	16
RI	181	74	base	1	8	5.56
RI	181	79	base	0.25	1	1.85
RI	181	79	base	0.25	2	0
RI	181	79	base	0.25	4	3.57
RI	181	79	base	0.25	8	0
RI	181	79	base	0.5	1	17.19
RI	181	79	base	0.5	2	5.77
RI	181	79	base	0.5	4	8
RI	181	79	base	0.5	8	3.77
RI	181	79	base	0.75	1	10
RI	181	79	base	0.75	2	3.39
RI	181	79	base	0.75	4	3.92
RI	181	79	base	0.75	8	5.66
RI	181	79	base	1	1	29.63
RI	181	79	base	1	2	55.32
RI	181	79	base	1	4	14.81
RI	181	79	base	1	8	11.11
RI	181	80	base	0.25	1	1.37
RI	181	80	base	0.25	2	0
RI	181	80	base	0.25	4	0
RI	181	80	base	0.25	8	2.74
RI	181	80	base	0.5	1	4.29
RI	181	80	base	0.5	2	3.8
RI	181	80	base	0.5	4	1.3
RI	181	80	base	0.5	8	0
RI	181	80	base	0.75	1	16.92
RI	181	80	base	0.75	2	13.64
RI	181	80	base	0.75	4	13.43
RI	181	80	base	0.75	8	5.41
RI	181	80	base	1	1	48
RI	181	80	base	1	2	25.71
RI	181	80	base	1	4	9.72
RI	181	80	base	1	8	17.39
RI	181	81	base	0.25	1	3.77
RI	181	81	base	0.25	2	0
RI	181	81	base	0.25	4	4.55
RI	181	81	base	0.25	8	0
RI	181	81	base	0.5	1	10.29
RI	181	81	base	0.5	2	1.79
RI	181	81	base	0.5	4	6.67
RI	181	81	base	0.5	8	5.17
RI	181	81	base	0.75	1	28.33
RI	181	81	base	0.75	2	9.68
RI	181	81	base	0.75	4	12.77
RI	181	81	base	0.75	8	3.13
RI	181	81	base	1	1	31.48
RI	181	81	base	1	2	24
RI	181	81	base	1	4	12.9
RI	181	81	base	1	8	11.86
RI	181	87	base	0.25	1	1.56
RI	181	87	base	0.25	2	0
RI	181	87	base	0.25	4	0
RI	181	87	base	0.25	8	1.27
RI	181	87	base	0.5	1	1.33
RI	181	87	base	0.5	2	1.3
RI	181	87	base	0.5	4	1.43
RI	181	87	base	0.5	8	0
RI	181	87	base	0.75	1	23.68
RI	181	87	base	0.75	2	2.63
RI	181	87	base	0.75	4	7.41
RI	181	87	base	0.75	8	1.54
RI	181	87	base	1	1	22.81
RI	181	87	base	1	2	25.76
RI	181	87	base	1	4	8.82
RI	181	87	base	1	8	27.63
RI	181	92	inactivate	0.25	1	0
RI	181	92	inactivate	0.25	2	2.08
RI	181	92	inactivate	0.25	4	0
RI	181	92	inactivate	0.25	8	0
RI	181	92	inactivate	0.5	1	7.46
RI	181	92	inactivate	0.5	2	0
RI	181	92	inactivate	0.5	4	0
RI	181	92	inactivate	0.5	8	2
RI	181	92	inactivate	0.75	1	0
RI	181	92	inactivate	0.75	2	1.82
RI	181	92	inactivate	0.75	4	2
RI	181	92	inactivate	0.75	8	0
RI	181	92	inactivate	1	1	15.09
RI	181	92	inactivate	1	2	14.29
RI	181	92	inactivate	1	4	0
RI	181	92	inactivate	1	8	5.26
RI	181	95	control	0.25	1	3.66
RI	181	95	control	0.25	2	0
RI	181	95	control	0.25	4	1.16
RI	181	95	control	0.25	8	1.22
RI	181	95	control	0.5	1	3.61
RI	181	95	control	0.5	2	0
RI	181	95	control	0.5	4	2.5
RI	181	95	control	0.5	8	0
RI	181	95	control	0.75	1	11.76
RI	181	95	control	0.75	2	1.25
RI	181	95	control	0.75	4	1.2
RI	181	95	control	0.75	8	2.38
RI	181	95	control	1	1	18.29
RI	181	95	control	1	2	6.98
RI	181	95	control	1	4	10.47
RI	181	95	control	1	8	4.94
RI	181	96	base	0.25	1	0
RI	181	96	base	0.25	2	1.61
RI	181	96	base	0.25	4	0
RI	181	96	base	0.25	8	2.04
RI	181	96	base	0.5	1	16.36
RI	181	96	base	0.5	2	4.26
RI	181	96	base	0.5	4	1.72
RI	181	96	base	0.5	8	0
RI	181	96	base	0.75	1	136.54
RI	181	96	base	0.75	2	106.52
RI	181	96	base	0.75	4	70.37
RI	181	96	base	0.75	8	92.59
RI	181	96	base	1	1	373.47
RI	181	96	base	1	2	249.12
RI	181	96	base	1	4	213.64
RI	181	96	base	1	8	191.23
RI	181	101	inactivate	0.25	1	6.98
RI	181	101	inactivate	0.25	2	0
RI	181	101	inactivate	0.25	4	0
RI	181	101	inactivate	0.25	8	0
RI	181	101	inactivate	0.5	1	0
RI	181	101	inactivate	0.5	2	2.22
RI	181	101	inactivate	0.5	4	5.13
RI	181	101	inactivate	0.5	8	4.88
RI	181	101	inactivate	0.75	1	21.43
RI	181	101	inactivate	0.75	2	9.52
RI	181	101	inactivate	0.75	4	4.65
RI	181	101	inactivate	0.75	8	12.82
RI	181	101	inactivate	1	1	62.16
RI	181	101	inactivate	1	2	25
RI	181	101	inactivate	1	4	6.82
RI	181	101	inactivate	1	8	20.93
RI	181	103	control	0.25	1	5.95
RI	181	103	control	0.25	2	0
RI	181	103	control	0.25	4	1.45
RI	181	103	control	0.25	8	0
RI	181	103	control	0.5	1	1.56
RI	181	103	control	0.5	2	3.08
RI	181	103	control	0.5	4	0
RI	181	103	control	0.5	8	0
RI	181	103	control	0.75	1	10.61
RI	181	103	control	0.75	2	3.28
RI	181	103	control	0.75	4	5.48
RI	181	103	control	0.75	8	0
RI	181	103	control	1	1	29.76
RI	181	103	control	1	2	14.63
RI	181	103	control	1	4	0
RI	181	103	control	1	8	1.54
